# 1 An atlas of healthy and injured cell 2 states and niches in the human kidney

3 Blue B. Lake<sup>1\*</sup>, Rajasree Menon<sup>2\*</sup>, Seth Winfree<sup>3\*</sup>, Qiwen Hu<sup>4\*</sup>, Ricardo Melo Ferreira<sup>5\*</sup>, Kian  
4 Kalhor<sup>1</sup>, Daria Barwinska<sup>5</sup>, Edgar A. Otto<sup>6</sup>, Michael Ferkowicz<sup>5</sup>, Dinh Diep<sup>1</sup>, Nongluk  
5 Plongthongkum<sup>1</sup>, Amanda Knoten<sup>7</sup>, Sarah Urata<sup>1</sup>, Abhijit S. Naik<sup>6</sup>, Sean Eddy<sup>6</sup>, Bo Zhang<sup>7</sup>, Yan  
6 Wu<sup>1</sup>, Diane Salamon<sup>7</sup>, James C. Williams<sup>5</sup>, Xin Wang<sup>4</sup>, Karol S. Balderrama<sup>8</sup>, Paul Hoover<sup>8</sup>,  
7 Evan Murray<sup>8</sup>, Anitha Vijayan<sup>7</sup>, Fei Chen<sup>8</sup>, Sushrut S. Waikar<sup>9</sup>, Sylvia Rosas<sup>10</sup>, Francis P.  
8 Wilson<sup>11</sup>, Paul M. Palevsky<sup>12</sup>, Krzysztof Kiryluk<sup>13</sup>, John R. Sedor<sup>14</sup>, Robert D. Toto<sup>15</sup>, Chirag  
9 Parikh<sup>16</sup>, Eric H. Kim<sup>17</sup>, Evan Z. Macosko<sup>8</sup>, Peter V. Kharchenko<sup>4</sup>, Joseph P. Gaut<sup>18</sup>, Jeffrey B.  
10 Hodgkin<sup>6</sup>, Michael T. Eadon<sup>5</sup>, Pierre C. Dagher<sup>5, ‡</sup>, Tarek M. El-Achkar<sup>5, ‡</sup>, Kun Zhang<sup>1, ‡</sup>, Matthias  
11 Kretzler<sup>6, ‡</sup>, Sanjay Jain<sup>7, 18, ‡</sup>, for the KPMP consortium<sup>19</sup>.

12  
13 <sup>1</sup>Department of Bioengineering, University of California, San Diego, La Jolla, CA 92093, USA

14 <sup>2</sup>Department of Computational Medicine and Bioinformatics, University of Michigan, Ann Arbor, MI 48109, USA.

15 <sup>3</sup>Department of Pathology and Microbiology, University of Nebraska Medical Center, Omaha, NE 68198, USA

16 <sup>4</sup>Department of Biomedical Informatics, Harvard Medical School, Boston, MA 02115, USA

17 <sup>5</sup>Department of Medicine, Indiana University School of Medicine, Indianapolis, IN 46202, USA

18 <sup>6</sup>Department of Internal Medicine, Division of Nephrology, University of Michigan, Ann Arbor, MI 48109, USA

19 <sup>7</sup>Department of Medicine, Washington University School of Medicine, St. Louis, MO 63110, USA

20 <sup>8</sup>Broad Institute of Harvard and MIT, Cambridge, MA 02142, USA

21 <sup>9</sup>Section of Nephrology, Boston University School of Medicine and Boston Medical Center, Boston, MA 02118, USA

22 <sup>10</sup>Joslin Diabetes Center and Harvard Medical School, Boston, MA 02215, USA

23 <sup>11</sup>Department of Medicine, Yale University School of Medicine, New Haven, CT 06510, USA

24 <sup>12</sup>Department of Medicine, University of Pittsburgh School of Medicine, Pittsburgh, PA 15213, USA

25 <sup>13</sup>Department of Medicine, Columbia University, New York, NY 10032, USA

26 <sup>14</sup>Lerner Research and Glickman Urology and Kidney Institutes, Cleveland Clinic, Cleveland, OH 44195, USA

27 <sup>15</sup>Department of Internal Medicine, UT Southwestern Medical Center, Dallas, TX 75390, USA

28 <sup>16</sup>Division of Nephrology, Johns Hopkins School of Medicine, Baltimore, MD 21287, USA

29 <sup>17</sup>Department of Surgery, Washington University School of Medicine, St. Louis, MO 63110, USA

30 <sup>18</sup>Department of Pathology and Immunology, Washington University School of Medicine, St. Louis, MO 63110, USA

31 <sup>19</sup>Kidney Research Institute, University of Washington, Seattle, WA 98104, USA

32

33 \*These Authors Contributed Equally

34 ‡Corresponding Authors

35 **Sanjay Jain** [sanjayjain@wustl.edu](mailto:sanjayjain@wustl.edu)

36 **Matthias Kretzler** [kretzler@med.umich.edu](mailto:kretzler@med.umich.edu)

37 **Kun Zhang** [kzhang@bioeng.ucsd.edu](mailto:kzhang@bioeng.ucsd.edu)

38 **Tarek M. El-Achkar** [telachka@iu.edu](mailto:telachka@iu.edu)

39 **Pierre C. Dagher** [pdaghe2@iu.edu](mailto:pdaghe2@iu.edu)

40

## 41 Abstract

42 Understanding kidney disease relies upon defining the complexity of cell types and states, their  
43 associated molecular profiles, and interactions within tissue neighborhoods. We have applied  
44 multiple single-cell or -nucleus assays (>400,000 nuclei/cells) and spatial imaging technologies  
45 to a broad spectrum of healthy reference (n = 42) and disease (n = 42) kidneys. This has  
46 provided a high resolution cellular atlas of 100 cell types that include rare and novel cell  
47 populations. The multi-omic approach provides detailed transcriptomic profiles, epigenomic  
48 regulatory factors, and spatial localizations for major cell types spanning the entire kidney. We  
49 further identify and define cellular states altered in kidney injury, encompassing cycling,  
50 adaptive or maladaptive repair, transitioning and degenerative states affecting several  
51 segments. Molecular signatures of these states permitted their localization within injury  
52 neighborhoods using spatial transcriptomics, and large-scale 3D imaging analysis of ~1.2  
53 million neighborhoods provided linkages to active immune responses. These analyses further  
54 defined biological pathways relevant to injury niches, including signatures underlying the  
55 transition from reference to predicted maladaptive states that were associated with a decline in  
56 kidney function during chronic kidney disease. This human kidney cell atlas, including injury cell  
57 states and neighborhoods, will be a valuable resource for future studies.

## 58 Introduction

59 The human kidneys play vital systemic roles in the preservation of body fluid homeostasis,  
60 metabolic waste product removal and blood pressure maintenance. This organ system has a  
61 remarkable ability to perform its functions by adapting to a wide range of physiological demands  
62 and pathological insults. After injury, there are dynamic acute and chronic morphological and  
63 cellular changes in renal tubules and surrounding interstitial niche. The balance between  
64 successful or maladaptive repair processes may ultimately determine potential for progressive  
65 decline in kidney function over time<sup>1-4</sup>. In this regard it is critical to delineate the landscape of  
66 cellular and molecular diversity of gene expression and regulation at a single cell level in the  
67 human kidney. This will be needed to fully understand how acute kidney injury (AKI) events can  
68 increase risk for progression to chronic kidney disease (CKD), kidney failure, heart disease or  
69 death, issues that remain a global concern<sup>5,6</sup>.

70 To this end, we report a next-generation multimodal single cell and 3D atlas that leverages  
71 integrated transcriptomic, epigenomic and imaging data over three major consortia: the Human  
72 Biomolecular Atlas Program (HuBMAP)<sup>7</sup>, the Kidney Precision Medicine Project (KPMP)<sup>8</sup>, and  
73 the Human Cell Atlas (HCA)<sup>9</sup>. To ensure robust cell state profiles, reference tissues were  
74 obtained from multiple sources, and biopsies were collected from AKI and CKD patients under  
75 rigorous quality assurance and control procedures<sup>7,8,10</sup>. We define micro niches for healthy and  
76 altered states across different regions of the human kidney spanning the cortex and medulla, to  
77 the papillary tip, and identify gene expression and regulatory modules in altered states  
78 associated with worsening kidney function. The resultant atlas of molecular cell types and their  
79 spatially resolved healthy and injury niches greatly expands upon existing efforts<sup>11-14</sup>. This will

80 serve as an important resource for a broad user base of investigators and clinicians working  
81 towards a better understanding of kidney processes in health or disease.

## 82 Results

### 83 Constructing a Cellular Atlas of the Human Kidney

84 To fully interrogate molecularly defined kidney cell types, we have applied droplet-based  
85 transcriptomic assays (Chromium v3) for single nuclei (snCv3) and single cells (scCv3) and the  
86 dual transcriptomic/epigenomic assay for single-nucleus chromatin accessibility and mRNA  
87 expression sequencing (SNARE-seq2 or SNARE2)<sup>15,16</sup> to a broad range of tissues from  
88 reference to AKI and CKD biopsies (**Supplementary Tables 1-3**). To glean insights into  
89 biologically relevant spatial interactions between these cell types or states *in situ*, we further  
90 applied 3D label-free imaging, multiplex fluorescence imaging, and the spatial transcriptomic  
91 assays Slide-Seq2<sup>17,18</sup> and Visium (**Fig. 1, Supplementary Tables 1-2; Methods**). Our  
92 heterogeneous sampling approach was designed to ensure cell type discovery with minimal  
93 assay dependent biases or artifacts associated with different sources of reference or disease  
94 kidney samples.

95 Integrative cross-platform transcriptome analyses were performed on >400,000 nuclei/cells  
96 (after quality filtering, **Methods**) from 58 reference tissues (37 donors) and 52 diseased tissues  
97 (36 patients) that covered the spectrum of kidney health through to acute and chronic kidney  
98 disease (**Fig. 1, Extended Data Fig. 1-4, Supplementary Table 1**). Unsupervised clustering  
99 was first performed on snCv3, permitting discovery of 100 distinct cell populations, which were  
100 annotated to subclasses of epithelial, endothelial, stromal, immune and neural cell types (**Fig. 2,**  
101 **Extended Data Fig. 1-2, Supplementary Tables 4-5, Methods**). To further extend cell type  
102 annotations across omic platforms, snCv3 was used to anchor scCv3 (**Extended data Fig. 3**)  
103 and SNARE2 (**Extended Data Fig. 4**) data sets to the same embedding space, and cell type  
104 labels were assigned through integrative clustering (**Supplementary Tables 6-7, Methods**).  
105 This permitted a single harmonized annotation across technologies for more accurate cross-  
106 platform interrogation of the same cell populations (**Extended Data Fig. 3-4**). This combined  
107 omic atlas permitted deeper and cross-validated molecular profiles for these aligned kidney cell  
108 types, leveraging the distinct advantages of each technology, for instance the addition of  
109 cytosolic transcripts from scCv3 and regulatory elements from SNARE2 accessible chromatin  
110 (AC).

111

### 112 Reference and Altered States

113 We now provide a higher level of complexity for all cell types along the depth of a kidney lobe  
114 from the cortex to the papillary tip (**Fig. 2a**), identifying 53 canonical human kidney cell types  
115 with associated biomarkers (**Supplementary Tables 8-9**). This includes a higher granularity for

116 the loop of Henle, distal convoluted tubule and collecting duct segments, now resolving: three  
117 descending thin limb cell types (DTL1, 2, 3); different subpopulations of medullary thick  
118 ascending limb cells (M-TAL); two types of distal convoluted tubule cells (DCT1, 2); intercalated  
119 and principal cells of the connecting tubules (CNT-IC and CNT-PC); cortical, outer medullary  
120 and inner medullary collecting duct subpopulations (CCD, OMCD, IMCD); and papillary tip  
121 epithelial cells abutting the calyx (PapE). We further provide molecular profiles for several rare  
122 cell types important in homeostasis, including: juxtaglomerular renin-producing granular cells  
123 (REN); macula densa (MD); and a novel cell population enriched in schwann/neuronal  
124 (SCI/NEU) genes *NRXN1*, *PLP1* and *S100B* (**Supplementary Table 9**). We were further able to  
125 stratify: major endothelial cell types, including endothelial cells of the lymphatics (EC-LYM) and  
126 vasa recta (EC-AVR, EC-DVR); major stromal cell types including distinct fibroblast populations  
127 oriented along the cortico-medullary axis; and 12 immune cell types from lymphoid and myeloid  
128 lineages.

129 Through harmonized SNARE2 dual-omic annotations, we characterized the epigenetic  
130 landscape distinguishing the major kidney cell types found in snCv3 data in the cortex and  
131 medulla (**Extended Data Fig. 5**). Using paired AC data from the same nuclei annotated using  
132 RNA expression profiles, we identified open chromatin regions and candidate cis-regulatory  
133 elements for cell type marker genes, as well as associated transcription factor (TF) binding motif  
134 enrichments (**Extended Data Fig. 5a-b, Supplementary Tables 10-11**). We further identified  
135 accessibility of TF binding sites (TFBS), indicative of potential activity of expressed TFs, across  
136 most of the cell types identified by snCv3 (**Extended Data Fig. 5c, Supplementary Table 12**).  
137 These include HNF4A in proximal tubule (PT), ESRRB in the TAL, GATA3 in the collecting  
138 tubules, FOXI1 in IC cells, SOX17 in ECs and MEF2D in VSMC/P.

139 To spatially localize cell types within the tissue, snCv3 subclasses were used to predict the  
140 corresponding identities in Slide-seq and Visium transcriptomic data at different resolution  
141 scales (10 $\mu$ m and 55 $\mu$ m beads, respectively) (**Fig. 2c-i, Extended Data Fig. 6-7,**  
142 **Supplementary Table 2, Methods**). This allowed for recapitulated renal corpuscle, tubular,  
143 vascular, and interstitial cell types having proportions, marker profiles, and spatial organizations  
144 consistent with expected or observed (Visium) histopathology (**Extended Data Fig. 6-7**).  
145 Proximity network analysis based on the cell type composition of adjacent Slide-seq beads  
146 across 9 tissue pucks delineated cellular neighborhoods (**Fig. 2d**), including the renal corpuscle  
147 (RC) composition of podocytes (POD), glomerular capillaries (EC-GC), mesangial cells (MC),  
148 and parietal epithelial cells (PEC). These localized adjacent to the juxtaglomerular apparatus  
149 cells, REN and MD, and endothelial cells of the afferent/efferent arterioles (EC-AEA) leading  
150 into and out of the RC (**Fig. 2e-f**). This neighborhood analysis further identified a distinct  
151 vascular smooth muscle cell (VSMC) population juxtaposing or flanking the AEA (**Fig. 2g**).  
152 Consistent with these annotations, we see the appropriate localization of associated cell type  
153 markers *REN* (REN), *NOS1* (MD), *NPHS2* (POD) and *MYH11* (VSMC), *SLC5A12* (PT-S1),  
154 *EMCN* (EC-GC) (**Fig. 2f-h**). In addition to the RC, we confirmed spatial resolution of  
155 subpopulations between the cortex and medulla, with the transition of C-TAL to M-TAL, both  
156 expressing *SLC12A1*, within the medullary rays (**Fig. 2i**). Therefore, the unique strengths of  
157 each spatial technology has enabled cross validation for our omic-defined cell type annotations.

158 This permitted spatial localization of these cell types into functional tissue units, and more  
159 stratified annotations for distinct VSMC cell populations.

160 In addition to healthy states, a critical and novel element of this reference atlas is the  
161 characterization of cellular states associated with perturbations or injury. We carefully defined  
162 these altered states based on prior studies and gene expression profiles for clusters showing  
163 known features of injury (**Supplementary Table 13, Methods**). From this we established  
164 multiple putative states from cycling, transitioning, adaptive (or maladaptive) repair, to the  
165 degenerative (degen) states that may ultimately progress to necrosis or apoptosis. Applying  
166 these definitions, we identified altered states within snCv3 data for cell types found along the  
167 nephron, as well as within the stroma and vasculature (**Fig. 2, Supplementary Table 4**). These  
168 were contributed at different proportions from both reference and disease tissues and found to  
169 exist across technologies (**Extended Data Fig. 1, 3, 4**).

170 Clusters associated with the putative adaptive or maladaptive repair states were predominantly  
171 found within the PT and TAL subclasses, which may be due to the higher abundance of these  
172 tubules. Adaptive PT (aPT) clusters showed correlation with maladaptive states in rodents  
173 (**Extended Data Fig. 2e**), with characteristic expression of *VCAM1*, *DCDC2* and *HAVCR1*  
174 (**Extended Data Fig. 8a, Supplementary Table 14**)<sup>3,19</sup>. Interestingly, we also identified a  
175 similar, as yet uncharacterized, state within the TAL, marked by *PROM1* (CD133) and *DCDC2*  
176 (**Extended Data Fig. 8a**). These are consistent with CD133+ PAX2+ lineage-restricted  
177 progenitors known to exist in the proximal and distal tubules of the adult kidney<sup>20,21</sup>. Both of  
178 these adaptive epithelial (aEpi) cell types showed expression profiles associated with epithelial  
179 differentiation, morphogenesis and EMT, while also exhibiting a marked down-regulation of  
180 transporters critical to their normal function (**Extended Data Fig. 8b-c**). Furthermore, both aEpi  
181 cell types shared common signaling pathways and TF activities associated with injury related  
182 signaling, including mitogen-activated protein kinases (MAPKs) FOS/JUN, TGF- $\beta$  and  
183 JAK/STAT<sup>22</sup> (**Extended Data Fig. 8d**). This suggests a common aEpi state, sharing molecular  
184 signatures associated with injury and repair, that occurs in higher abundance within the PT and  
185 cortical TAL. Further, we find heterogeneity in aEpi clusters, with different developmental and  
186 differentiation pathways (aPT: SOX4, SOX6 and SOX13; aTAL: PAX2, TCF12 and PKNOX1)  
187 and distinct FOS/JUN and REL enriched clusters that may show distinct contributions to either  
188 successful or failed repair. We also identified separate adaptive states within the stroma (aStr)  
189 that are consistent with cell types contributing to wound healing and fibrosis following tissue  
190 injury (**Extended Data Fig. 2g**)<sup>23</sup>. These include myofibroblasts (MyoF), cycling MyoF  
191 (cycMyoF) and a population of adaptive fibroblasts (aFIB) representing potential MyoF  
192 progenitors<sup>23</sup>. We find increased expression of genes encoding periostin (*POSTN*), fibroblast  
193 activation protein alpha (*FAP*), smooth muscle actin (*ACTA2*) and collagens, characteristic of  
194 these altered states (**Extended Data Fig. 9a**).

195 To assess altered state severity at the cellular level, we developed a scoring system using a  
196 strategy previously employed for single-cell ECM expression (**Extended Data Fig. 9**)<sup>23</sup> using  
197 conserved genes upregulated in each of the altered states (degen, aPT, aTAL, aStr and cycling)  
198 across conditions (reference, AKI, CKD) (**Supplementary Tables 15-18**). Consistently, the  
199 state of cell clusters or subclasses within snCv3 and scCv3 could be predicted by their

200 aggregate score values (**Extended Data Fig. 9b-e**). For example, aStr high scoring cell  
201 populations also showed high matrisome scores that is in line with their predicted role in ECM  
202 deposition. We also found elevated cycling state scores within AKI tissues compared to CKD  
203 (**Extended Data Fig. 9g**). This, and the potential enrichment of aEpi scores in AKI for a number  
204 of distal tubules, implies a higher level of repair or remodeling may be underway following acute  
205 injury events compared to ongoing chronic injury.

206 In addition to adaptive state signatures, we find common expression signatures that are shared  
207 across degenerative states coinciding with elevated expression of the known injury markers  
208 *SPP1*, *CST3*, *CLU* and *IGFBP7*<sup>24</sup> (**Extended Data Fig. 9d-e**). Consistent with this, SNARE2 AC  
209 data identified common TFBS activities that may play a role in kidney cell degeneration, and  
210 that were associated with FOS/JUN signalling (**Extended Data Fig. 9f**). Therefore, common  
211 expression signatures associated with altered states permit single-cell/nucleus scoring, allowing  
212 both cellular level classification and possible insight into pathogenetic mechanisms of disease.  
213 Altered state scoring also provides a means for tagging injury populations in reference tissues  
214 arising from sample acquisition or normal aging, allowing for a cleaner representation of a  
215 healthy tissue reference atlas (**Extended Data Fig. 10**).

216 For spatial localization of injury, altered states were predicted along with reference states in  
217 both Slide-seq (aEpi, aStr, cycling) and Visium (aEpi, aStr, cycling, transitioning and  
218 degenerative) data. From Slide-seq, we identified areas of potential fibrosis around the AEAs  
219 that were enriched for aStr (aFIB, MyoF) and immune cell types, and which showed elevated  
220 *COL1A1* expression (**Fig. 3a-e**). We also identified an adjacent aTAL population with  
221 downregulated *EGF* expression, known to occur upon TAL injury<sup>25</sup>, and an upregulation of the  
222 aTAL marker *ITGB6* (**Fig. 3c, Supplementary Table 16**). For more detailed coverage of altered  
223 states, we used Visium on diseased tissues (**Figure 3f-k**), where there was an expected  
224 enrichment for adaptive states in CKD compared to reference tissues (**Extended Data Fig. 7b**).  
225 Furthermore, this technology permitted direct linkage of molecular profiles to histological areas  
226 of injury. Using this strategy, we interrogated an area of chronic fibrosis within a cortical CKD  
227 specimen (**Fig. 3f-g, Extended Data Fig 7e-f**). We found significant fibrosis that was associated  
228 with cell-type signatures arising from the stromal (FIB), aStr (aFIB), and immune cell clusters,  
229 especially monocyte derived cells (**Fig. 3g, Extended Data Fig. 7e-f**). There was also evident  
230 degeneration of FIB with increased expression of *B2M* and *VIM* (**Fig. 3g**). This region was  
231 surrounded by dilated and atrophic tubules that showed an aPT signature, including  
232 upregulation of *CDH6*<sup>19</sup> (**Fig. 3g, Supplementary Table 16**). We also identified an area of PT-  
233 S1, showing degenerative and adaptive signatures, with *CDH6* expression adjacent to an area  
234 of MyoF accumulation and immune cell infiltration (**Fig. 3h-j, Extended Data Fig. 7g-h**).

235 In addition to cortical cell types, we found evidence for medullary injury of the collecting duct  
236 (**Fig. 3j-k**). Here we identified an arc of injured tubules, most with intraluminal cellular cast  
237 formation, cell sloughing, and loss of nuclei. This region was associated with degenerative CD  
238 cells, including dM-PC and transitioning principal and intercalated cells (tPC-IC) (**Fig. 3k**).  
239 Consistently, the degenerative marker *DEFB1* was locally up-regulated in this region where it  
240 may contribute to fibrosis by recruiting immune cells<sup>26</sup>. We also found distinct spatial  
241 localization of medullary vascular (EC-DVR, VSMC/P) and stromal (M-FIB) cell types adjacent

242 to the region of injury (**Fig. 3j**). Therefore these results support co-mapping of reference and  
243 altered cell types identified from omic technologies, with specific states localized to histologic  
244 areas of injury in the appropriate cortical or medullary region of the kidney.

## 245 Spatially Mapped Injury Neighborhoods

246 To uncover *in situ* cellular niches and injured microenvironments across kidney disease we  
247 probed the growing KPMP cohort of 3D imaging data of kidney biopsies (**Extended Data Fig.**  
248 **11a, Supplementary Tables 2-3**). This included 3D fluorescence and second harmonic  
249 (fibrosis) image generation for specimens from both AKI and CKD patients (15 individuals,  
250 several interrogated by multiple technologies) and sampling of cortical and/or medullary renal  
251 tissue<sup>27</sup>. We used 3D-tissue cytometry to identify the composition of cellular niches associated  
252 with areas of altered or injured morphology. Cellular niches were defined for every cell  
253 (1,540,563 total over 15 individuals) by neighborhood analysis (cells within 25  $\mu\text{m}$ ) based on the  
254 14 classes that covered the majority of renal cortical structures (**Fig 4a, Extended Data Fig.**  
255 **11b, Methods**). From over 1.2 million total neighborhoods, we identified 14 unique groupings  
256 through community detection that included expected niches of cortical or medullary epithelium  
257 (N7 and N8 vs N14, N9 and N1 respectively, **Fig. 4b-c**). The TAL and PT epithelium  
258 neighborhoods (N7 and N8), as compared to other tubular epithelium and renal structures, had  
259 distinct neighborhoods enriched with areas of injury (**Fig. 4c and Extended Data Fig. 11c**).  
260 Furthermore, areas of injury were associated with infiltrating leukocytes including  
261 neighborhoods of CD68+, MPO+ and CD3+ cells (N6, N11 and N13 respectively). Uniquely,  
262 CD3+ cells were detected in a subset of neighborhoods almost exclusively with areas of tissue  
263 damage including presumptive epithelial degeneration (loss of markers and simplification) and  
264 fibrosis (N13, **Fig. 4c, a3 and Extended Data Fig. 11e**). In contrast, the myeloid cells were  
265 found in more cellular diverse niches including two neighborhoods with either cortical or  
266 medullary epithelium (N6 and N11, **Fig. 4c**). The leukocyte diversity was unique in these  
267 neighborhoods, as MPO+ and CD3+ cells were overlapping in neighborhoods (N11), whereas  
268 CD3+ cells were conspicuously low in neighborhoods with CD68+ cells (N6). Pairwise  
269 associations within neighborhoods identified a positive correlation between CD3+ and MPO+  
270 but not CD68+ cells (**Fig. 4d-e**). Performing similar pairwise analyses for subsets of  
271 neighborhoods further identified positive correlations between leukocytes and specific renal  
272 structures, including CD68+ cells with PT epithelium and MPO+ cells with glomeruli (**Fig. 4e-h**).  
273 Overall, we found that altered states associated with renal injury in disease were enriched in PT  
274 and TAL neighborhoods, and showed predominantly CD3+ immune cell activity (**Fig. 4c,**  
275 **Extended Data Fig. 11c,e**). Thus, 3D imaging and tissue cytometry analysis of 1.2 million  
276 neighborhoods demonstrated distinct immune-active cellular niches and their association with  
277 discrete regions of healthy and injured tubules.

278

## 279 Adaptive or Maladaptive Repair States

280 To obtain a deeper understanding of the genetic networks underlying the progression and  
281 potential pathology of altered PT and TAL, we performed trajectory inference on

282 snCv3/SNARE2 and scCv3 subpopulations (**Fig. 5a-f**). While most degen states appeared too  
283 disconnected, both segment trajectories for the adaptive progression did show a transition from  
284 gene expression modules associated with normal function (black/red - PT; black/pink - TAL) to  
285 those associated with differentiation (magenta/yellow/turquoise - PT; brown/yellow/blue - TAL,  
286 **Supplementary Tables 19-20**). A majority of the expression gains were conserved across  
287 platforms (snCv3/SNARE2 and scCv3) and were found to occur towards the end of each  
288 trajectory (**Extended Data Fig. 12a-g**). These were associated with progenitor states that  
289 coincided with both maximal *PROM1* (CD133) expression (**Fig. 5 c, f**) and overlap with genes  
290 associated with failed repair in mouse AKI<sup>3</sup> (turquoise module - PT, **Extended Data Fig. 12c**).  
291 There was also a concomitant increase in *HAVCR1* (KIM1) that was higher in PT, yet appeared  
292 elevated in AKI over CKD for TAL samples (**Fig. 5 c, f**). This suggests that this state, while  
293 potentially arising from acute injury, may persist in chronic disease.

294  
295 Expression signatures across the trajectories revealed an enhancement in growth factor  
296 signaling with known roles in promoting tubulogenesis, maladaptive repair, fibrosis and  
297 inflammation. This includes Wnt (*DCDC2*, *PRICKLE*), Notch, TGF- $\beta$  (*ITGB6*), EGF (*PLSCR1*)  
298 and Rho/Rac signalling pathways (**Fig. 5b,e**, **Extended Data Fig. 12d**, **Supplementary Tables**  
299 **19-21**)<sup>28-36</sup>. Furthermore, we identify progressive activation of the MAPK (FOS/JUN), TGF- $\beta$  and  
300 JAK/STAT pathways across both nephron segments, as predicted from TF activities associated  
301 with gene modules (**Extended Data Fig. 12i,k**, **Supplementary Table 22**) and TF motif  
302 accessibilities across adaptive trajectories (**Fig. 5 g-h**, **Supplementary Table 23**). Consistently,  
303 proximal tubule cells that showed expression of *PROM1* were also found subjacent to  
304 phosphorylated JUN (p-JUN) likely suggesting close association of maladaptive and reparative  
305 cells (**Extended Data Fig. 12l-q**). As shown in prior studies, we identified progressively active  
306 REL/NF-KB signaling along the aPT trajectory<sup>14</sup>, that was also predicted based on expression  
307 modules in the aTAL trajectory (**Extended Data Fig. 12k**). We also found increased cAMP  
308 signaling (Creb TFs in aPT) capable of promoting dedifferentiation<sup>37</sup> and increased ELF3  
309 activities potentially required for MET<sup>38</sup>, both indicating that adaptive states may be poised for  
310 re-epithelialization. Therefore, we find adaptive epithelial trajectories sharing common molecular  
311 profiles that progressively upregulate cytokine signaling involved in tubule regeneration, while  
312 also providing molecular links to pathways associated with fibrosis, inflammation and end-stage  
313 kidney disease.

314  
315 Given the upregulation of fibrotic cytokine signaling along adaptive trajectories, these  
316 regenerating cells may represent maladaptive states if they accumulate or fail to complete  
317 tubulogenesis. Therefore, we investigated the contribution of these states to cell-cell secreted  
318 ligand-receptor interactions within a fibrotic niche (**Supplementary Tables 24-26**). From  
319 imaging assays, this niche may comprise aEpi cells adjacent to normal and altered arteriole  
320 cells and fibroblasts, and immune cells that include T cells or macrophages depending on the  
321 level of tubular degeneration (**Figures 3-4**). Using snCv3 and scCv3 data sets associated with  
322 trajectory modules, we identified both late aPT and aTAL states as having a higher number of  
323 interactions with the stroma (**Fig. 5i**). This was associated with secreted growth factors of the  
324 FGF, BMP, WNT, EGF, IGF and TGF- $\beta$  families (**Extended Data Fig. 13a-b**). Furthermore, late  
325 modules and aStr cell types showed a higher number of ligand-receptor interactions with



326 immune cells (**Fig. 5i, Extended Data Fig. 13c-d**). This indicates adaptive tubule states may  
327 recruit immune cells both primarily and secondarily through their recruitment of the activated  
328 fibroblasts and myofibroblasts. This is consistent with the activation of Rel/NF- $\kappa$ B and CEBPD  
329 transcription factors, having known roles in promoting inflammation<sup>39,40</sup>, in the aEpi populations  
330 (**Fig. 5g-h**). We also found expression of the PVR Cell Adhesion Molecule (CD155) gene in late  
331 aTAL modules that may mediate its interactions with natural killer (NK) cells, or provide a  
332 mechanism to escape immune surveillance through PVR association with TIGIT (**Extended**  
333 **Data Fig. 12e**)<sup>41,42</sup>. The upregulation of PVR in aTAL and not aPT might contribute to the fewer  
334 observed T or NKC/T cell associations with C-TAL compared to PT neighborhoods (**Fig. 4e-f**).

335  
336 We also find additional evidence for the activation of EGF pathway signaling within the adaptive  
337 epithelial trajectories, which in itself may lead to activation of TGF- $\beta$  signalling and create a  
338 niche capable of promoting fibrosis<sup>36</sup>. Consistently, EGF ligands NRG1 and NRG3 both become  
339 expressed in aEpi states for a possible role in MAC-M2 recruitment (**Extended Data Fig.**  
340 **12c,e**). Furthermore, expression of EGF receptors ERBB2, ERBB4 (aPT/aTAL) and ERBB3  
341 (aPT) may poise these cells for contribution to autocrine/paracrine signalling within the adaptive  
342 tubules (**Extended Data Fig. 12e**). Since MAPK pathways can mediate ErbB receptor signaling,  
343 it remains possible that the increased activity of FOS/JUN could in fact be associated with EGF  
344 pathway functions promoting regeneration (**Fig.5g-h**). Therefore, we identify expression and  
345 regulatory signatures associated with a common reparative state in proximal and distal tubules.  
346 However, this may represent a maladaptive state that produces and receives a number of  
347 cytokine signals that promotes both fibrosis and inflammation. In support of this, we find PROM1  
348 expression along either trajectory to be elevated within CKD compared to AKI cases (**Fig. 5c,f**).  
349 We also find distinct expression profiles exist within different tubular segments that may  
350 modulate how these cells interact with their fibrotic niches or contribute to disease progression.  
351

## 352 Adaptive but not degenerative state scores associate with progressive decline in 353 kidney function

354 To identify whether aEpi cell states contribute to chronic kidney disease, we identified gene  
355 signatures for altered states that were conserved across technologies (snCv3 and scCv3)  
356 (**Supplementary Table 27**) and that were associated with disease severity (**Extended Data**  
357 **Fig. 14a-d**). These signatures were assessed for their association with disease progression  
358 within the Nephrotic Syndrome Study Network (NEPTUNE) cohort of 199 patients<sup>43</sup>. Composite  
359 gene expression scores were computed on the tubulointerstitial compartment for degenerative  
360 and adaptive cell states and used for Kaplan-Meier (K-M) analyses. In an unadjusted survival  
361 model, high adaptive, but not degenerative, state scores were significantly associated with  
362 composite endpoint (40% loss of eGFR or ESKD), with aTAL and aStr showing the most  
363 significant associations (p value < 0.0001) (**Fig. 6a, Extended Data Fig. 14e**). This indicated  
364 that aEpi processes may represent maladaptation and, like fibrosis-promoting aStr states,  
365 associate with disease progression. Alternatively, degenerative states progressing to necrosis  
366 or apoptosis may not accumulate over time. Interestingly, high adaptive state scores from a  
367 common set of aPT-aTAL genes were also found to have a significant association with faster

368 end point (p value < 0.0015), indicating a common, adaptive epithelial state that may  
369 accumulate or persist and ultimately contribute to eventual organ failure due to maladaptive  
370 repair.

371 Additional analysis of transcriptomic data from 111 kidney disease patients in the European  
372 Renal cDNA Bank (ERCB) cohort<sup>44</sup>, found scores for all adaptive, but not degenerative, states  
373 were significantly higher in the diabetic nephropathy (DN) patients compared to that of living  
374 donors (LD) (**Fig. 6b, Extended Data Fig. 14f**). The high association with ESKD and DN scores  
375 were found for each adaptive tubule type, demonstrating critical roles for effective repair  
376 mechanisms not only in the PT, but also in the TAL. Therefore, TAL functionality, which may  
377 include its known GFR-regulatory role through tubuloglomerular feedback, may represent a  
378 major contributing factor to progressive kidney failure. Consistent with this, causal variants for  
379 eGFR and chronic kidney failure were found to be enriched within TAL regulatory regions that  
380 also were enriched for Estrogen Related Receptor (ESRR) TF motifs (**Fig. 6c, Supplementary**  
381 **Table 28**). ESRR TFs (especially ESRRB), key players in TAL ion transporter expression<sup>45</sup>, are  
382 central regulators of the TAL expression network (**Extended Data Fig. 14g**) and become  
383 inactivated in adaptive states (**Fig. 4h**). Therefore, we demonstrate both a potential maladaptive  
384 role for the aEpi states and a potential central role for the TAL segment in maintaining the health  
385 and homeostasis of the human kidney. This is consistent with the finding that the top renal  
386 genes showing decline in a mouse aging cell atlas were associated with the TAL<sup>46</sup>.

387 Our findings implicate an accumulation of maladaptive epithelia during disease progression that  
388 may be consistent with chronically senescent cells<sup>4</sup>. This is supported by both increased  
389 expression of aging related genes and an apparent senescence-associated secretory  
390 phenotype (SASP) for these cells (**Fig. 5, Fig. 6d, Extended Data Fig. 14h**). As such, we  
391 detected *CDKN1A* (p21<sup>cip1</sup>), *CDKN1B* (p27<sup>kip1</sup>), *CDKN2A* (p16<sup>ink4a</sup>) and *CCL2* expression in late  
392 aPT and aTAL states (**Fig. 6d**). Furthermore, expression signatures for reparative processes in  
393 aEpi states were downregulated in the CKD (n = 28) over AKI (n = 22) cases used in this study  
394 (snCv3/scCv3), while G1/S checkpoint regulatory factors were upregulated (**Supplementary**  
395 **Table 30**). This is consistent with repair processes that may persist after injury<sup>19</sup>, but that may  
396 subsequently transition to senescent pro-fibrotic states during disease progression.

397

## 398 Discussion

399

400 We present a comprehensive spatially resolved cell atlas to define genes and pathways across  
401 the corticomedullary axis of the kidney, including signalling between tubules, stroma and  
402 immune cells that underlie normal and pathological cell neighborhoods. Through careful  
403 definition of injury states, we identify putative adaptive or maladaptive repair signatures within  
404 the epithelial segments that may reflect a failure to complete differentiation and tubulogenesis.  
405 This enabled us to resolve and greatly expand upon existing healthy reference and altered state  
406 cell identities. Spatial analyses prioritized relevant cell-cell interaction niches associated with

407 altered injury states and permitted reconstruction of the fibrotic niche. From this we find that  
408 expression signatures for the progression of adaptive states within the proximal and distal  
409 tubules are associated with elevated cytokine production, increased interactions with the fibrotic  
410 and inflammatory cell types and ultimately the progression to end stage kidney disease. These  
411 adaptive state signatures were highly associated with tubule regeneration and differentiation,  
412 indicating that the potential failure of these cells to complete tubulogenesis might ultimately lead  
413 to a progressive decline in kidney function. This may arise from an incompatible milieu  
414 associated with the high level of cytokine signalling found within the fibrotic niche. In turn, the  
415 high cytokine producing nature of these cells may further contribute to kidney disease through  
416 promotion of fibrosis. We identified specific modules in aEpi states enriched in senescence  
417 associated genes suggesting likely perturbation of cell cycle progression that will require deeper  
418 evaluation. Since several adaptive markers were overlapped across tubular regions,  
419 physiological or pathological stresses may initiate activation of common signaling events that  
420 could be subject to the same therapeutic strategies.

421  
422 In this study, we have leveraged multiple technologies, samples, sites and health conditions,  
423 representing efforts between the HuBMAP, KPMP and HCA consortia, to define cell types and  
424 states underlying health and disease. This atlas will serve as a key resource for studies into:  
425 normal physiology and sex differences; pathways associated with transitions from healthy and  
426 injury states; clinical outcomes; disease pathogenesis; and targeted interventions.

## 427 References

- 428 1. Park, J. *et al.* Single-cell transcriptomics of the mouse kidney reveals potential cellular  
429 targets of kidney disease. *Science* **360**, 758–763 (2018).
- 430 2. Sheng, L. & Zhuang, S. New Insights Into the Role and Mechanism of Partial Epithelial-  
431 Mesenchymal Transition in Kidney Fibrosis. *Front. Physiol.* **11**, 569322 (2020).
- 432 3. Kirita, Y., Wu, H., Uchimura, K., Wilson, P. C. & Humphreys, B. D. Cell profiling of mouse  
433 acute kidney injury reveals conserved cellular responses to injury. *Proc. Natl. Acad. Sci. U.*  
434 *S. A.* **117**, 15874–15883 (2020).
- 435 4. Docherty, M.-H., O'Sullivan, E. D., Bonventre, J. V. & Ferenbach, D. A. Cellular  
436 Senescence in the Kidney. *J. Am. Soc. Nephrol.* **30**, 726–736 (2019).
- 437 5. Lameire, N. H. *et al.* Acute kidney injury: an increasing global concern. *Lancet* **382**, 170–  
438 179 (2013).
- 439 6. Zuk, A. & Bonventre, J. V. Acute Kidney Injury. *Annu. Rev. Med.* **67**, 293–307 (2016).
- 440 7. HuBMAP Consortium. The human body at cellular resolution: the NIH Human Biomolecular  
441 Atlas Program. *Nature* **574**, 187–192 (2019).
- 442 8. de Boer, I. H. *et al.* Rationale and design of the Kidney Precision Medicine Project. *Kidney*  
443 *Int.* **99**, 498–510 (2021).
- 444 9. Regev, A. *et al.* The Human Cell Atlas. *Elife* **6**, (2017).
- 445 10. El-Achkar, T. M. *et al.* A multimodal and integrated approach to interrogate human kidney  
446 biopsies with rigor and reproducibility: guidelines from the Kidney Precision Medicine  
447 Project. *Physiol. Genomics* **53**, 1–11 (2021).
- 448 11. Lake, B. B. *et al.* A single-nucleus RNA-sequencing pipeline to decipher the molecular  
449 anatomy and pathophysiology of human kidneys. *Nat. Commun.* **10**, 2832 (2019).
- 450 12. Menon, R. *et al.* Single cell transcriptomics identifies focal segmental glomerulosclerosis  
451 remission endothelial biomarker. *JCI Insight* **5**, (2020).

- 452 13. Stewart, B. J. *et al.* Spatiotemporal immune zonation of the human kidney. *Science* **365**,  
453 1461–1466 (2019).
- 454 14. Muto, Y. *et al.* Single cell transcriptional and chromatin accessibility profiling redefine  
455 cellular heterogeneity in the adult human kidney. *Nat. Commun.* **12**, 2190 (2021).
- 456 15. Chen, S., Lake, B. B. & Zhang, K. High-throughput sequencing of the transcriptome and  
457 chromatin accessibility in the same cell. *Nat. Biotechnol.* **37**, 1452–1457 (2019).
- 458 16. Bakken, T. E. *et al.* Evolution of cellular diversity in primary motor cortex of human,  
459 marmoset monkey, and mouse. *bioRxiv* 2020.03.31.016972 (2020)  
460 doi:10.1101/2020.03.31.016972.
- 461 17. Rodriques, S. G. *et al.* Slide-seq: A scalable technology for measuring genome-wide  
462 expression at high spatial resolution. *Science* **363**, 1463–1467 (2019).
- 463 18. Stickels, R. R. *et al.* Highly sensitive spatial transcriptomics at near-cellular resolution with  
464 Slide-seqV2. *Nat. Biotechnol.* **39**, 313–319 (2021).
- 465 19. Gerhardt, L. M. S., Liu, J., Koppitch, K., Cippà, P. E. & McMahon, A. P. Single-nuclear  
466 transcriptomics reveals diversity of proximal tubule cell states in a dynamic response to  
467 acute kidney injury. *Proc. Natl. Acad. Sci. U. S. A.* **118**, (2021).
- 468 20. Bussolati, B. *et al.* Isolation of renal progenitor cells from adult human kidney. *Am. J.*  
469 *Pathol.* **166**, 545–555 (2005).
- 470 21. Cohen-Zontag, O. *et al.* Human kidney clonal proliferation disclose lineage-restricted  
471 precursor characteristics. *Sci. Rep.* **10**, 22097 (2020).
- 472 22. Tao, J. *et al.* JAK-STAT signaling is activated in the kidney and peripheral blood cells of  
473 patients with focal segmental glomerulosclerosis. *Kidney Int.* **94**, 795–808 (2018).
- 474 23. Kuppe, C. *et al.* Decoding myofibroblast origins in human kidney fibrosis. *Nature* **589**, 281–  
475 286 (2021).
- 476 24. Murray, P. T. *et al.* Potential use of biomarkers in acute kidney injury: report and summary  
477 of recommendations from the 10th Acute Dialysis Quality Initiative consensus conference.

- 478 *Kidney Int.* **85**, 513–521 (2014).
- 479 25. Ju, W. *et al.* Tissue transcriptome-driven identification of epidermal growth factor as a  
480 chronic kidney disease biomarker. *Sci. Transl. Med.* **7**, 316ra193 (2015).
- 481 26. Andresen, E., Günther, G., Bullwinkel, J., Lange, C. & Heine, H. Increased expression of  
482 beta-defensin 1 (DEFB1) in chronic obstructive pulmonary disease. *PLoS One* **6**, e21898  
483 (2011).
- 484 27. Ferkowicz, M. J. *et al.* Large-scale, three-dimensional tissue cytometry of the human  
485 kidney: a complete and accessible pipeline. *Lab. Invest.* **101**, 661–676 (2021).
- 486 28. Schueler, M. *et al.* DCDC2 mutations cause a renal-hepatic ciliopathy by disrupting Wnt  
487 signaling. *Am. J. Hum. Genet.* **96**, 81–92 (2015).
- 488 29. Yu, J. *et al.* A Wnt7b-dependent pathway regulates the orientation of epithelial cell division  
489 and establishes the cortico-medullary axis of the mammalian kidney. *Development* **136**,  
490 161–171 (2009).
- 491 30. Park, J.-S., Valerius, M. T. & McMahon, A. P. Wnt/beta-catenin signaling regulates nephron  
492 induction during mouse kidney development. *Development* **134**, 2533–2539 (2007).
- 493 31. Miller, R. K. & McCrea, P. D. Wnt to build a tube: contributions of Wnt signaling to epithelial  
494 tubulogenesis. *Dev. Dyn.* **239**, 77–93 (2010).
- 495 32. Patel, S. *et al.* Rac-GTPase promotes fibrotic TGF- $\beta$ 1 signaling and chronic kidney disease  
496 via EGFR, p53, and Hippo/YAP/TAZ pathways. *FASEB J.* **33**, 9797–9810 (2019).
- 497 33. Edeling, M., Ragi, G., Huang, S., Pavenstädt, H. & Susztak, K. Developmental signalling  
498 pathways in renal fibrosis: the roles of Notch, Wnt and Hedgehog. *Nat. Rev. Nephrol.* **12**,  
499 426–439 (2016).
- 500 34. Meecham, A. & Marshall, J. F. The ITGB6 gene: its role in experimental and clinical  
501 biology. *Gene X* **5**, 100023 (2020).
- 502 35. Nanjundan, M. *et al.* Plasma membrane phospholipid scramblase 1 promotes EGF-  
503 dependent activation of c-Src through the epidermal growth factor receptor. *J. Biol. Chem.*

- 504           **278**, 37413–37418 (2003).
- 505   36. Harskamp, L. R., Gansevoort, R. T., van Goor, H. & Meijer, E. The epidermal growth factor  
506       receptor pathway in chronic kidney diseases. *Nat. Rev. Nephrol.* **12**, 496–506 (2016).
- 507   37. Puri, P. *et al.* Ectopic Phosphorylated Creb Marks Dedifferentiated Proximal Tubules in  
508       Cystic Kidney Disease. *Am. J. Pathol.* **188**, 84–94 (2018).
- 509   38. Sengez, B. *et al.* The Transcription Factor Elf3 Is Essential for a Successful Mesenchymal  
510       to Epithelial Transition. *Cells* **8**, (2019).
- 511   39. Tak, P. P. & Firestein, G. S. NF-kappaB: a key role in inflammatory diseases. *J. Clin.*  
512       *Invest.* **107**, 7–11 (2001).
- 513   40. Yamaguchi, J., Tanaka, T., Eto, N. & Nangaku, M. Inflammation and hypoxia linked to renal  
514       injury by CCAAT/enhancer-binding protein  $\delta$ . *Kidney Int.* **88**, 262–275 (2015).
- 515   41. Pende, D. *et al.* PVR (CD155) and Nectin-2 (CD112) as ligands of the human DNAM-1  
516       (CD226) activating receptor: involvement in tumor cell lysis. *Mol. Immunol.* **42**, 463–469  
517       (2005).
- 518   42. Lupo, K. B. & Matosevic, S. CD155 immunoregulation as a target for natural killer cell  
519       immunotherapy in glioblastoma. *J. Hematol. Oncol.* **13**, 76 (2020).
- 520   43. Gadegbeku, C. A. *et al.* Design of the Nephrotic Syndrome Study Network (NEPTUNE) to  
521       evaluate primary glomerular nephropathy by a multidisciplinary approach. *Kidney Int.* **83**,  
522       749–756 (2013).
- 523   44. Yasuda, Y., Cohen, C. D., Henger, A., Kretzler, M. & European Renal cDNA Bank (ERCB)  
524       Consortium. Gene expression profiling analysis in nephrology: towards molecular definition  
525       of renal disease. *Clin. Exp. Nephrol.* **10**, 91–98 (2006).
- 526   45. Krid, H., Dorison, A., Salhi, A., Cheval, L. & Crambert, G. Expression profile of nuclear  
527       receptors along male mouse nephron segments reveals a link between ERR $\beta$  and thick  
528       ascending limb function. *PLoS One* **7**, e34223 (2012).
- 529   46. Tabula Muris Consortium. A single-cell transcriptomic atlas characterizes ageing tissues in

- 530 the mouse. *Nature* **583**, 590–595 (2020).
- 531 47. Eadon, M. T. *et al.* Kidney Histopathology and Prediction of Kidney Failure: A Retrospective  
532 Cohort Study. *Am. J. Kidney Dis.* **76**, 350–360 (2020).
- 533 48. Martin, M. Cutadapt removes adapter sequences from high-throughput sequencing reads.  
534 *EMBnet.journal* **17**, 10–12 (2011).
- 535 49. Petukhov, V. *et al.* dropEst: pipeline for accurate estimation of molecular counts in droplet-  
536 based single-cell RNA-seq experiments. *Genome Biol.* **19**, 78 (2018).
- 537 50. Dobin, A. *et al.* STAR: ultrafast universal RNA-seq aligner. *Bioinformatics* **29**, 15–21 (2013).
- 538 51. Fang, R. *et al.* Comprehensive analysis of single cell ATAC-seq data with SnapATAC. *Nat.*  
539 *Commun.* **12**, 1337 (2021).
- 540 52. Li, H. Minimap2: pairwise alignment for nucleotide sequences. *Bioinformatics* **34**, 3094–  
541 3100 (2018).
- 542 53. Gayoso, A., Shor, J., Carr, A. J., Sharma, R. & Pe'er, D. *GitHub: DoubletDetection*. (2019).  
543 doi:10.5281/zenodo.2678042.
- 544 54. Young, M. D. & Behjati, S. SoupX removes ambient RNA contamination from droplet-based  
545 single-cell RNA sequencing data. *Gigascience* **9**, (2020).
- 546 55. Chen, L., Chou, C.-L. & Knepper, M. A. A Comprehensive Map of mRNAs and Their  
547 Isoforms across All 14 Renal Tubule Segments of Mouse. *J. Am. Soc. Nephrol.* (2021)  
548 doi:10.1681/ASN.2020101406.
- 549 56. Ransick, A. *et al.* Single-Cell Profiling Reveals Sex, Lineage, and Regional Diversity in the  
550 Mouse Kidney. *Dev. Cell* **51**, 399–413.e7 (2019).
- 551 57. Börner, K. *et al.* Anatomical Structures, Cell Types, and Biomarkers Tables Plus 3D  
552 Reference Organs in Support of a Human Reference Atlas. *bioRxiv* 2021.05.31.446440  
553 (2021) doi:10.1101/2021.05.31.446440.
- 554 58. Chen, L., Chou, C.-L. & Knepper, M. A. Targeted Single-Cell RNA-seq Identifies Minority  
555 Cell Types of Kidney Distal Nephron. *J. Am. Soc. Nephrol.* (2021)



- 556 doi:10.1681/ASN.2020101407.
- 557 59. Monaco, G. *et al.* RNA-Seq Signatures Normalized by mRNA Abundance Allow Absolute  
558 Deconvolution of Human Immune Cell Types. *Cell Rep.* **26**, 1627–1640.e7 (2019).
- 559 60. Aevermann, B. D. *et al.* Cell type discovery using single-cell transcriptomics: implications  
560 for ontological representation. *Hum. Mol. Genet.* **27**, R40–R47 (2018).
- 561 61. Aran, D. *et al.* Reference-based analysis of lung single-cell sequencing reveals a  
562 transitional profibrotic macrophage. *Nat. Immunol.* **20**, 163–172 (2019).
- 563 62. Heng, T. S. P., Painter, M. W. & Immunological Genome Project Consortium. The  
564 Immunological Genome Project: networks of gene expression in immune cells. *Nat.*  
565 *Immunol.* **9**, 1091–1094 (2008).
- 566 63. Takemon, Y. *et al.* Proteomic and transcriptomic profiling reveal different aspects of aging  
567 in the kidney. *Elife* **10**, (2021).
- 568 64. Ruscetti, M. *et al.* NK cell-mediated cytotoxicity contributes to tumor control by a cytostatic  
569 drug combination. *Science* **362**, 1416–1422 (2018).
- 570 65. Basisty, N. *et al.* A proteomic atlas of senescence-associated secretomes for aging  
571 biomarker development. *PLoS Biol.* **18**, e3000599 (2020).
- 572 66. Korotkevich, G. *et al.* Fast gene set enrichment analysis. *bioRxiv* (2016)  
573 doi:10.1101/060012.
- 574 67. Luo, W., Friedman, M. S., Shedden, K., Hankenson, K. D. & Woolf, P. J. GAGE: generally  
575 applicable gene set enrichment for pathway analysis. *BMC Bioinformatics* **10**, 161 (2009).
- 576 68. Stuart, T., Srivastava, A., Lareau, C. & Satija, R. Multimodal single-cell chromatin analysis  
577 with Signac. *bioRxiv* 2020.11.09.373613 (2020) doi:10.1101/2020.11.09.373613.
- 578 69. Schep, A. N., Wu, B., Buenrostro, J. D. & Greenleaf, W. J. chromVAR: inferring  
579 transcription-factor-associated accessibility from single-cell epigenomic data. *Nat. Methods*  
580 **14**, 975–978 (2017).
- 581 70. Bravo González-Blas, C. *et al.* cisTopic: cis-regulatory topic modeling on single-cell ATAC-

- 582 seq data. *Nat. Methods* **16**, 397–400 (2019).
- 583 71. Pliner, H. A. *et al.* Cicero Predicts cis-Regulatory DNA Interactions from Single-Cell  
584 Chromatin Accessibility Data. *Mol. Cell* **71**, 858–871.e8 (2018).
- 585 72. Yu, G., Wang, L.-G. & He, Q.-Y. ChIPseeker: an R/Bioconductor package for ChIP peak  
586 annotation, comparison and visualization. *Bioinformatics* **31**, 2382–2383 (2015).
- 587 73. Wu, Y., Tamayo, P. & Zhang, K. Visualizing and Interpreting Single-Cell Gene Expression  
588 Datasets with Similarity Weighted Nonnegative Embedding. *Cell Syst* **7**, 656–666.e4  
589 (2018).
- 590 74. Ulirsch, J. C. *et al.* Interrogation of human hematopoiesis at single-cell and single-variant  
591 resolution. *Nat. Genet.* **51**, 683–693 (2019).
- 592 75. Wang, J. *et al.* CAUSALdb: a database for disease/trait causal variants identified using  
593 summary statistics of genome-wide association studies. *Nucleic Acids Res.* **48**, D807–D816  
594 (2020).
- 595 76. Chen, W. *et al.* Fine Mapping Causal Variants with an Approximate Bayesian Method Using  
596 Marginal Test Statistics. *Genetics* **200**, 719–736 (2015).
- 597 77. Canela-Xandri, O., Rawlik, K. & Tenesa, A. An atlas of genetic associations in UK Biobank.  
598 *Nat. Genet.* **50**, 1593–1599 (2018).
- 599 78. Tin, A. *et al.* Target genes, variants, tissues and transcriptional pathways influencing  
600 human serum urate levels. *Nat. Genet.* **51**, 1459–1474 (2019).
- 601 79. Wuttke, M. *et al.* A catalog of genetic loci associated with kidney function from analyses of  
602 a million individuals. *Nat. Genet.* **51**, 957–972 (2019).
- 603 80. Zhu, Z. *et al.* Genetic overlap of chronic obstructive pulmonary disease and cardiovascular  
604 disease-related traits: a large-scale genome-wide cross-trait analysis. *Respir. Res.* **20**, 64  
605 (2019).
- 606 81. Barisoni, L. *et al.* Digital pathology evaluation in the multicenter Nephrotic Syndrome Study  
607 Network (NEPTUNE). *Clin. J. Am. Soc. Nephrol.* **8**, 1449–1459 (2013).

- 608 82. Levey, A. S. *et al.* GFR decline as an end point for clinical trials in CKD: a scientific  
609 workshop sponsored by the National Kidney Foundation and the US Food and Drug  
610 Administration. *Am. J. Kidney Dis.* **64**, 821–835 (2014).
- 611 83. Street, K. *et al.* Slingshot: cell lineage and pseudotime inference for single-cell  
612 transcriptomics. *BMC Genomics* **19**, 477 (2018).
- 613 84. Zhang, B. & Horvath, S. A general framework for weighted gene co-expression network  
614 analysis. *Stat. Appl. Genet. Mol. Biol.* **4**, Article17 (2005).
- 615 85. Jassal, B. *et al.* The reactome pathway knowledgebase. *Nucleic Acids Res.* **48**, D498–  
616 D503 (2020).
- 617 86. Not provided, R. *et al.* Library generation using slide-seqV2 v2 (protocols.io.Bvv6n69e).  
618 *protocols.io* (2021) doi:10.17504/protocols.io.bvv6n69e.
- 619 87. Dries, R. *et al.* Giotto: a toolbox for integrative analysis and visualization of spatial  
620 expression data. *Genome Biol.* **22**, 78 (2021).
- 621 88. Cable, D. M. *et al.* Robust decomposition of cell type mixtures in spatial transcriptomics.  
622 *Nat. Biotechnol.* (2021) doi:10.1038/s41587-021-00830-w.
- 623 89. Melo Ferreira, R. *et al.* Integration of spatial and single cell transcriptomics localizes  
624 epithelial-immune cross-talk in kidney injury. *JCI Insight* (2021)  
625 doi:10.1172/jci.insight.147703.
- 626 90. Janosevic, D. *et al.* The orchestrated cellular and molecular responses of the kidney to  
627 endotoxin define a precise sepsis timeline. *Elife* **10**, (2021).
- 628 91. Winfree, S. *et al.* Quantitative Three-Dimensional Tissue Cytometry to Study Kidney Tissue  
629 and Resident Immune Cells. *J. Am. Soc. Nephrol.* **28**, 2108–2118 (2017).
- 630 92. Winfree, S. *et al.* Large-scale 3-dimensional quantitative imaging of tissues: state-of-the-art  
631 and translational implications. *Transl. Res.* **189**, 1–12 (2017).
- 632

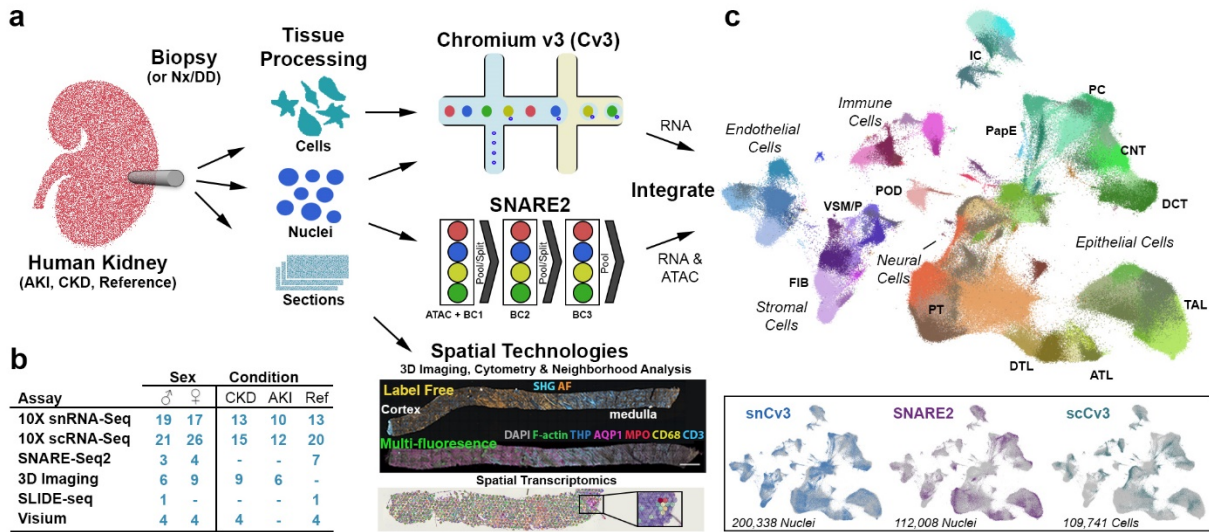

633  
634  
635  
636  
637  
638  
639  
640  
641

**Figure 1. Overview of technologies used to generate a human kidney cell atlas.** **a.** Human kidney samples summarized in **(b)** consisted of healthy reference, AKI or CKD nephrectomies (Nx), deceased donors (DD) or biopsies. Tissues were processed for one or more assays that included snCv3, scCv3, SNARE2, 3D imaging or spatial transcriptomics (Slide-seq2, Visium). **c.** Omic RNA data was integrated, as shown by joint UMAP embedding, for alignment of cell type annotations across the three different data modalities.

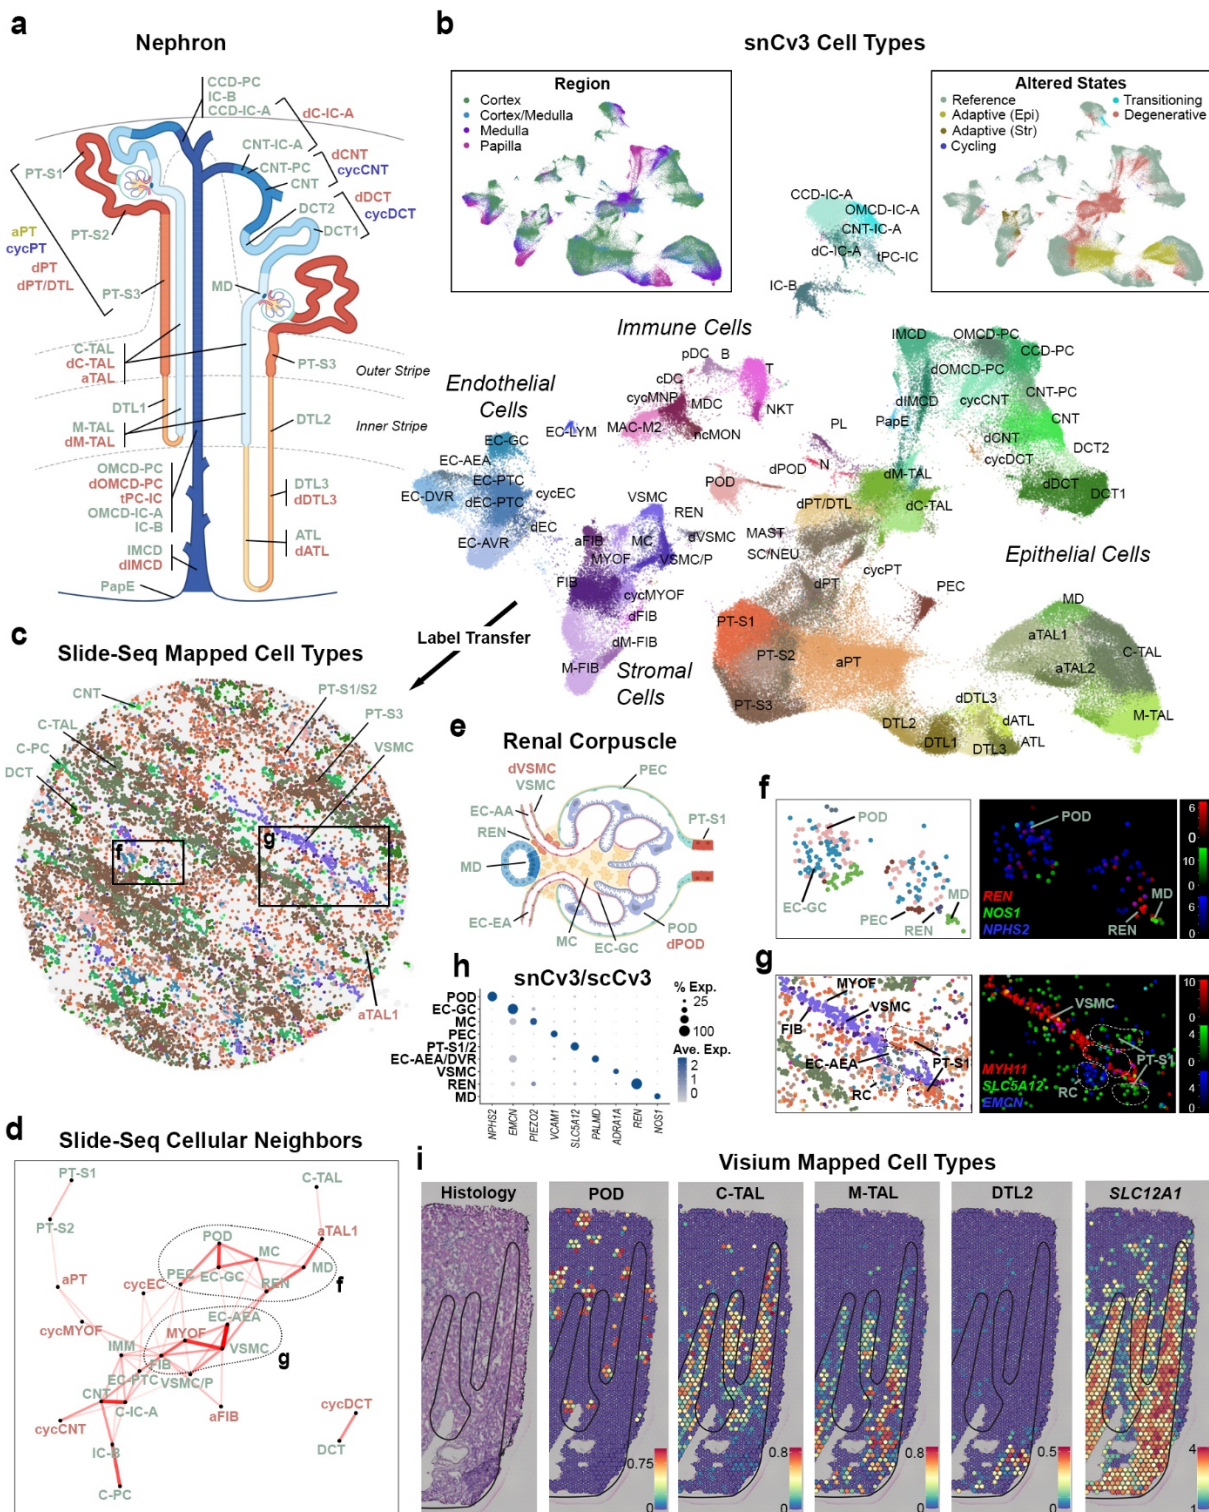

642  
 643 **Figure 2. Spatially resolved atlas of molecular cell types.** a. Schematic of the human  
 644 nephron showing cell types and states resolved from snCv3. b. UMAP embedding showing cell  
 645 types (subclass level 3) for snCv3. Insets show overlays for both regional origin and altered  
 646 state status. c. Spatial distribution of cell type labeled beads associated with a single Slide-seq2

647 processed tissue puck. Puck diameter is 3mm. **d.** Cell proximity network for Slide-seq2 cell  
648 types. **e.** Schematic of the renal corpuscle showing snCv3 resolved cell types. **f.** Left panel  
649 shows Slide-seq2 puck area indicated in **(c)** and predicted cell types for renal corpuscles,  
650 highlighting cellular neighbors predicted in **(d)**. Right panel shows the mapped expression  
651 values for corresponding marker genes. **g.** Left panel shows Slide-seq2 puck area indicated in  
652 **(c)** and predicted cell types for the AEAs and surrounding cell types, highlighting cellular  
653 neighbors predicted in **(d)**. Right panel shows the mapped expression values for corresponding  
654 marker genes. **h.** Dotplot showing average expression values in snCv3 and scCv3 for markers  
655 shown in **(f)** and **(g)**. **i.** 10X Visium data on a healthy reference kidney (cortex, top; medulla,  
656 bottom). Left panel shows H&E staining of the tissue, right panels show per bead predicted  
657 transfer scores for cell clusters or transcript expression values. Each spot is 55  $\mu$ m in diameter.  
658  
659

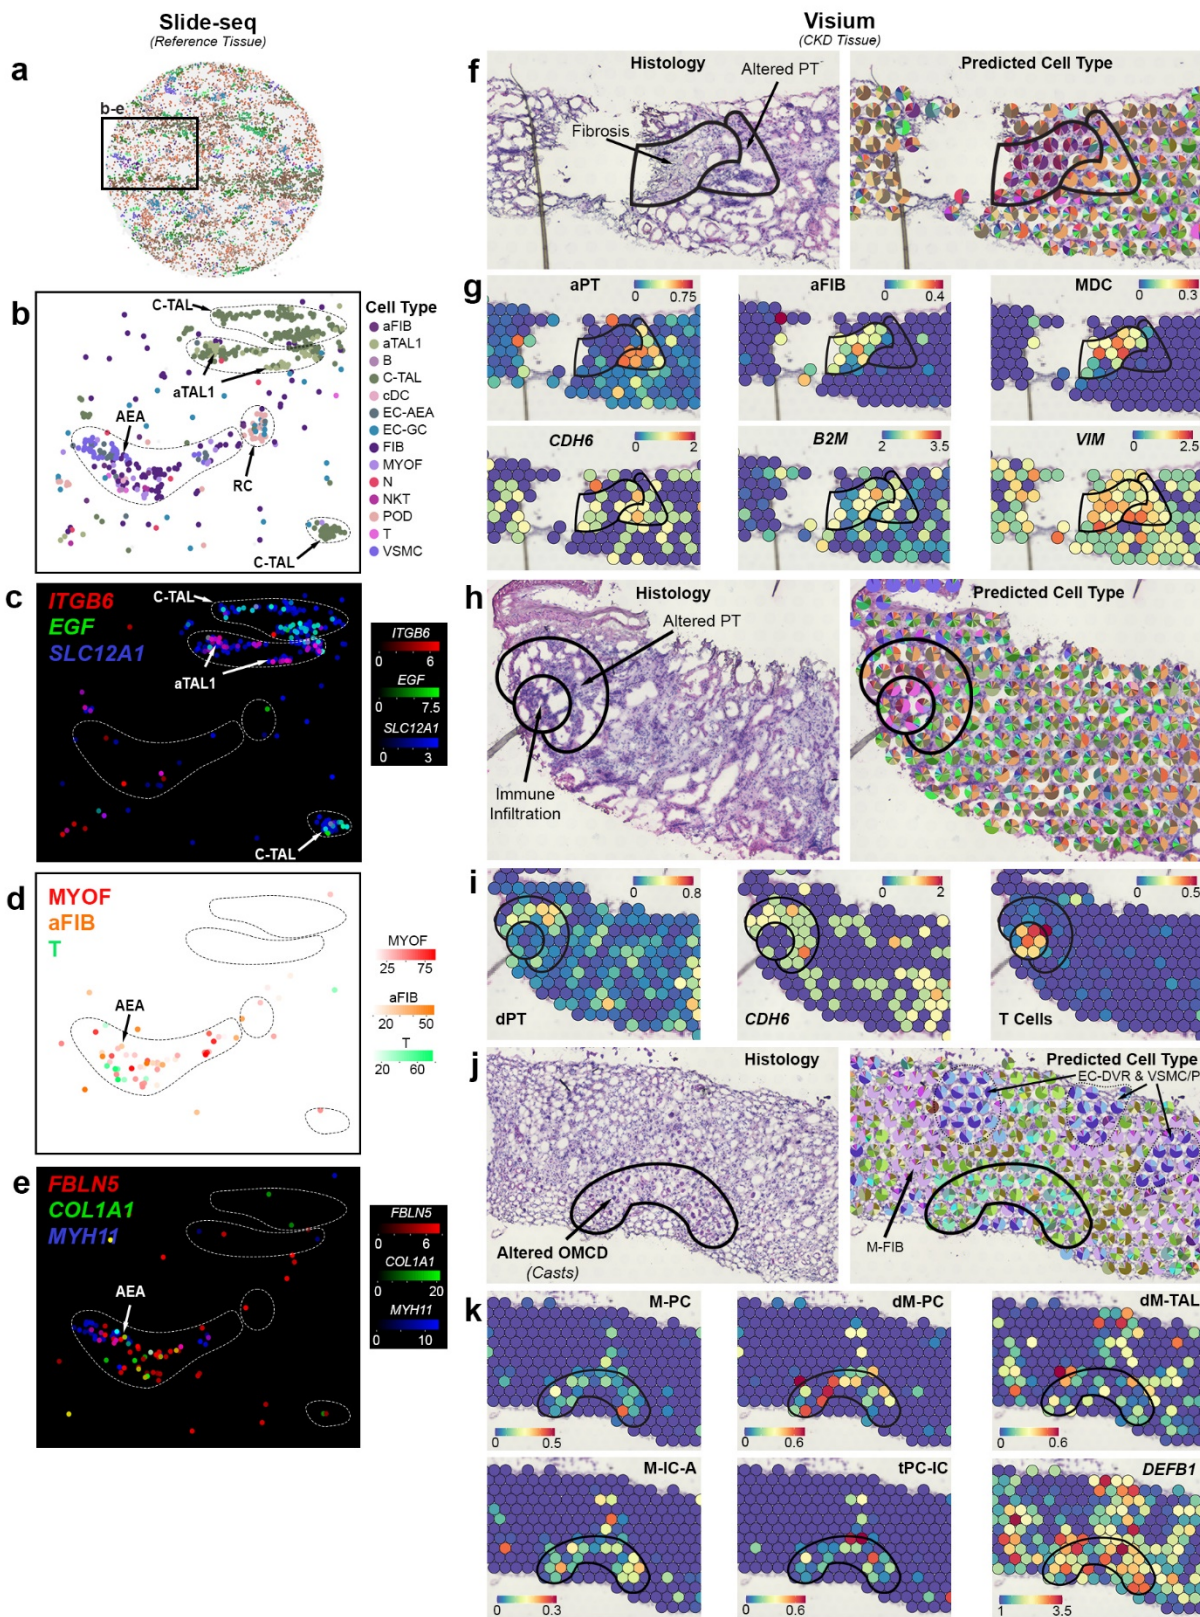

662 **Figure 3. Transcriptomically defined injury neighborhoods.** **a.** Slide-seq2 bead locations for  
663 a single tissue puck, colored by predicted cell subclasses as shown in **Figure 2b**. Puck  
664 diameter is 3mm. **b.** Slide-seq2 puck region indicated in **(a)** showing a subset of predicted cell  
665 types. **c.** Mapped expression values for aTAL (*ITGB6*) and TAL (*EGF* and *SLC12A1*) marker  
666 genes for cell types shown in **(b)**. **d.** Prediction weights for cell types mapped to puck region  
667 indicated in **(a)**. **e.** Mapped expression values for FIB (*FBLN5*), VSMC and MYOF (*MYH11*) and  
668 aStr (*COL1A1*) marker genes for cell types shown in **(d)**. **f.** Histology and predicted cell types in  
669 a cortical region (CKD) of interstitial fibrosis. Pie charts are proportions of predicted transfer  
670 scores. **g.** Per bead predicted transfer scores for cell types or transcript expression values for  
671 area shown in **(f)**. **h.** Histology and predicted cell types for a region with altered PT and immune  
672 cell infiltration. **i.** Predicted transfer scores and expression transcript expression values for area  
673 shown in **(h)**. **j.** Histology and predicted cell types for a medullary region of acute tubular  
674 necrosis (cellular cast formation within tubular lumens, loss of brush border, loss of nuclei, and  
675 epithelial simplification). Pie charts are proportions of predicted transfer scores. **k.** Predicted  
676 transfer scores and expression transcript expression values for area shown in **(j)**. For Visium  
677 panels, each spot is 55  $\mu\text{m}$  in diameter.  
678  
679



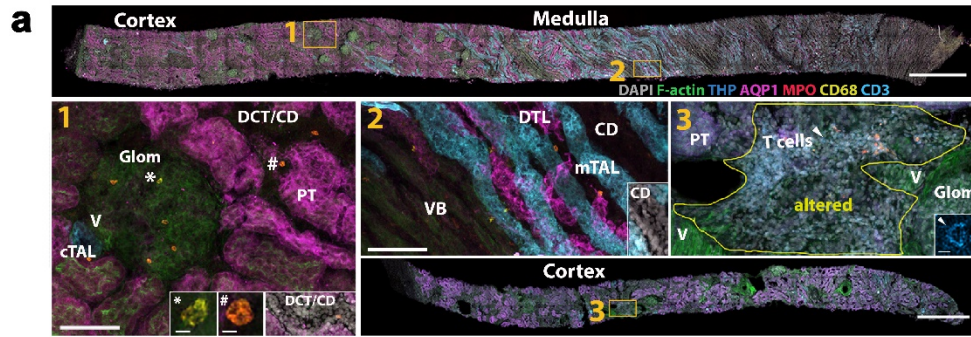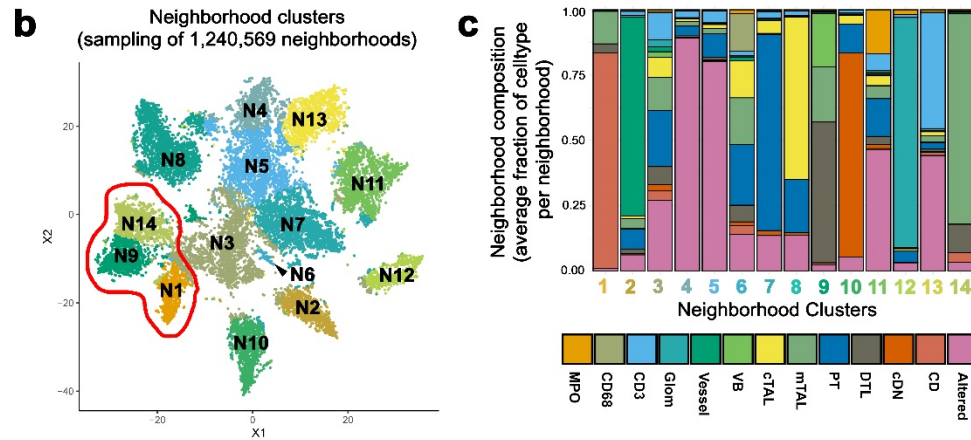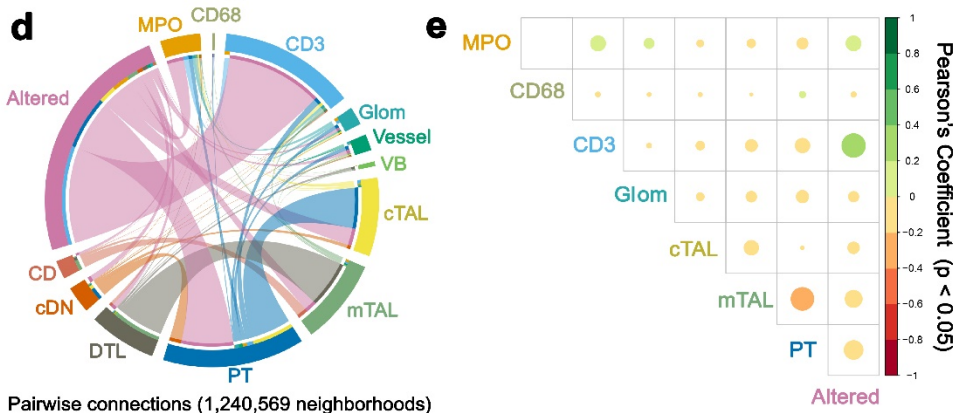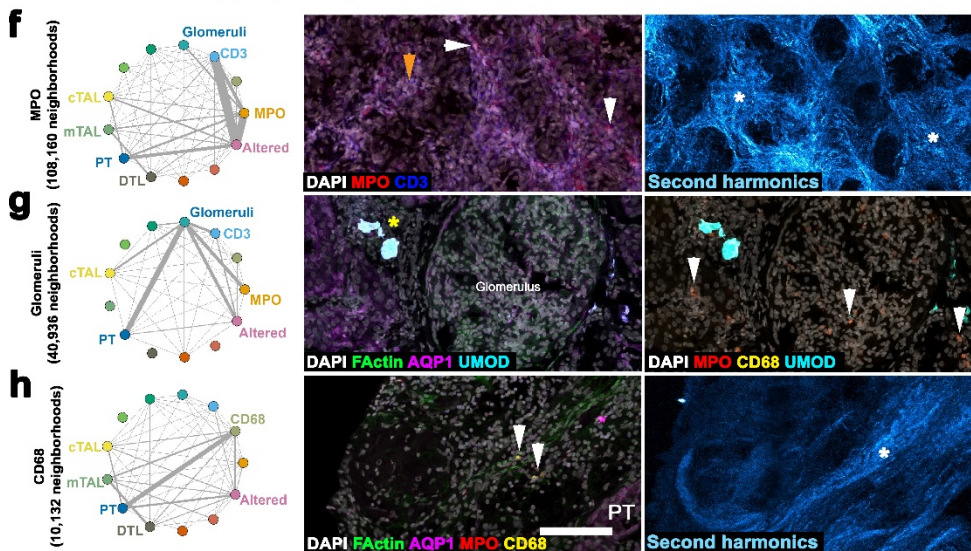

681 **Figure 4. Defining cellular niches in renal disease from 3D fluorescence imaging. a.**  
682 Maximum intensity projections of representative biopsies (cortex or medulla) showing  
683 classification label examples (insets **1-3**). These include: vessels (V, **1** and **3**) glomeruli (Glom,  
684 **1**), proximal tubules (PT, **1**), descending thin limb (DTL), medullary thick ascending limb (mTAL,  
685 **2**), vascular bundle (VB, **2**), cortical TAL (c-TAL, **1**), distal convoluted tubule, connecting tubules  
686 and collecting ducts (DCT/CNT/CD or cDN, **1**), medullary CD (CD, **2**) and areas of altered  
687 morphology or injury (altered, **3**). Examples of MPO+ and CD68+ are indicated in **1**. Scale bars  
688 are 1 mm in biopsy images, 100  $\mu$ m in **1** and **2** and 5  $\mu$ m in insets. **b.** Community based  
689 clustering on cell composition for ~20,000 randomly chosen neighborhoods (15 biopsies or  
690 individuals). The red outline indicates neighborhoods including the medulla. **c.** Average cellular  
691 composition of the neighborhoods identified in (**b**). **d.** Pairwise analysis of cells within 1.2 million  
692 neighborhoods (15 biopsies or individuals), colors as indicated in (**c**). **e.** Pearson's Coefficients  
693 for select interactions, the color indicates both the value and direction of the correlation. **f-g.**  
694 Neighborhoods with at least one cell for the labels indicated (MPO, Glomeruli and CD68) were  
695 subsetted and neighborhood graphs generated to indicate the pairwise interaction between cell  
696 labels. At right: maximum Z-projections of 3D confocal fluorescence images with white arrow  
697 indicating MPO+ cells (**f** and **g**) or CD68+ cells (**h**), orange arrows indicating CD3+ cells and  
698 asterisks highlighting fibrosis (white) or areas of altered morphology/injury (yellow). Scale bar =  
699 100  $\mu$ m.



702 **Figure 5. Expression and regulatory signatures of adaptive epithelial cells. a.** Top:  
703 Trajectory of PT cells for snCv3 and scCv3 datasets. Bottom: PT embeddings colored based on  
704 cell density. The right panel shows the cell density difference between AKI and CKD. **b.**  
705 Heatmap of smoothed gene expression profiles along the inferred pseudo-time for PT cells.  
706 Color blocks on the left showing different modules identified based on the gene expression  
707 profiles. **c.** Left panels: changes of smoothed gene expression as a function of inferred pseudo-  
708 time colored based on the cells associated with their correspondent modules. Right panels:  
709 changes of smoothed gene expression as a function of inferred pseudo-time colored based on  
710 disease conditions. **d.** Trajectory of TAL cells for snCv3 and scCv3 datasets. Bottom: TAL  
711 embeddings colored based on cell density. The right panel shows the cell density difference  
712 between AKI and CKD. **e.** Heatmap of smoothed gene expression profiles along the inferred  
713 pseudo-time for TAL cells. Color blocks on the left showing different modules identified based  
714 on the gene expression profiles. **f.** Left panels: changes of smoothed gene expression for  
715 representative genes as a function of inferred pseudotime colored based on the cells associated  
716 with their correspondent modules. Right panels: changes of smoothed gene expression as a  
717 function of inferred pseudotime colored based on disease conditions. **g.** Top panel: dot plot of  
718 SNARE2 average accessibilities (chromVAR) and proportion accessible for TFBSs showing  
719 differential activity in aPT modules. Bottom panel: dot plot of averaged gene expression values  
720 (log scale) and proportion expressed for integrated snCv3/scCv3 modules. **h.** Dot plots as in (g)  
721 for aTAL modules. **i.** Circos plots showing number of secreted (non-integrin) ligand-receptor  
722 interactions between different cell populations. Arrows indicate direction of the interaction.  
723  
724  
725

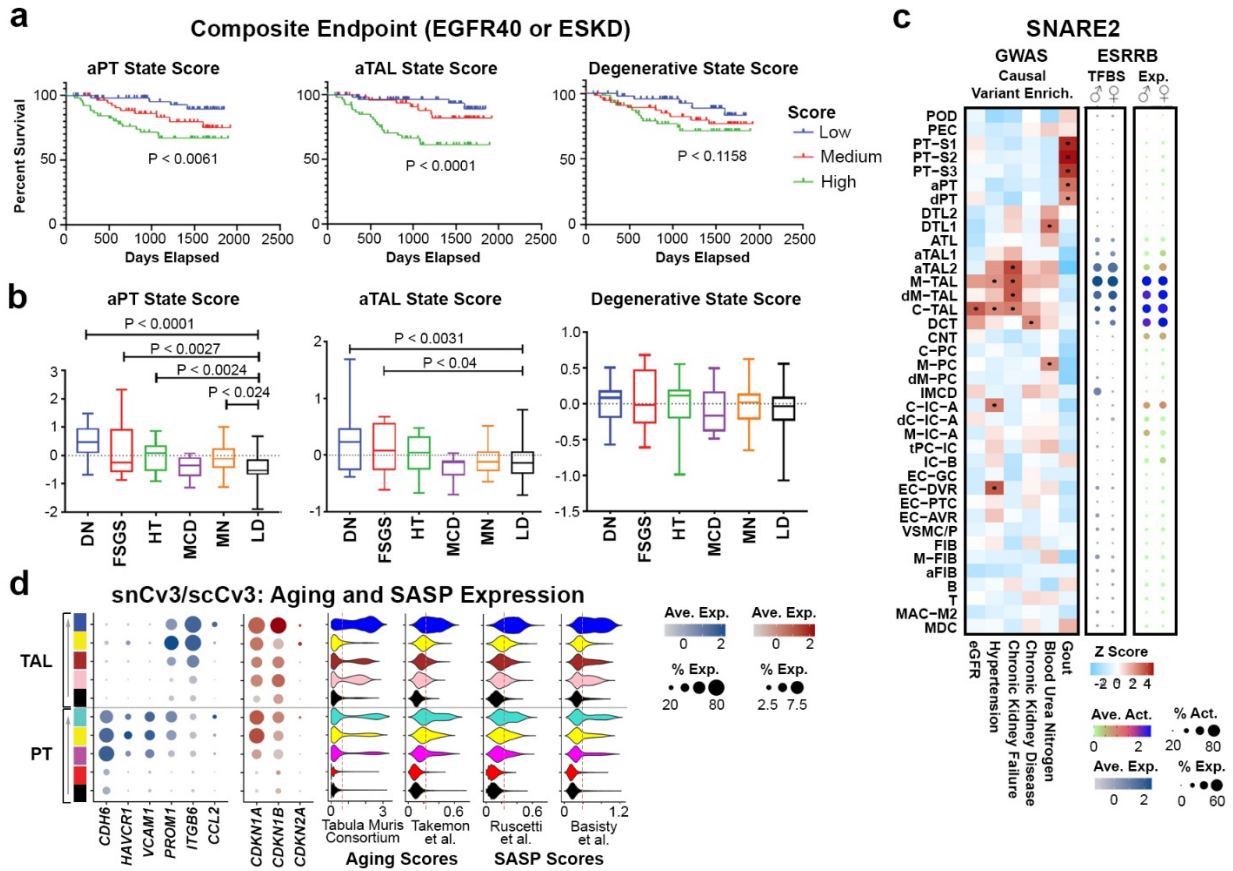

726  
 727 **Figure 6. Adaptive signatures are associated with poor clinical outcome.** **a.** Unadjusted  
 728 Kaplan Meier curves by cell state scores for composite of end stage renal disease (ESRD) or for  
 729 40% drop in estimated glomerular filtration rate (eGFR) from time of biopsy in Neptune adult  
 730 patient cohort (199 patients). Patients that reached the endpoint between screening and biopsy  
 731 were excluded. The P values of log-rank tests for trend are shown. **b.** Boxplot of aPT, aTAL and  
 732 degenerative state scores by kidney disease groups in the ERCB cohort (111 patients). Disease  
 733 groups include diabetic nephropathy (DN), focal segmental glomerulosclerosis (FSGS),  
 734 hypertensive nephropathy (HT), minimal change disease (MCD) and membranous nephropathy  
 735 (MN). Boxes extend from the 25th to the 75th percentile for each group's distribution and  
 736 horizontal lines denote median values. Significant P values from unpaired t-tests between  
 737 disease groups and living donors (LD) are shown. **c.** Heatmap of causal variants (z-scores)  
 738 peak enrichments. Dots represent Z-scores  $> 2$  (or P value  $< 0.05$ ). Dotplots show averaged  
 739 ESRRB binding site accessibility or gene expression (log values) and percent accessible or  
 740 expressed. **d.** Dot plots of averaged gene expression values (log scale) and proportion  
 741 expressed for integrated snCv3/scCv3 modules. Violin plots show gene expression scores for  
 742 gene sets associated with aging or SASP (Methods).

743  
 744  
 745

## 746 Methods

### 747 **Statistics and Reproducibility**

748 For spatial transcriptomics, 3D imaging and immunofluorescence staining experiments, each  
749 staining was repeated on at least 2 separate individuals or separate regions. For SLIDE-seq  
750 where only one individual was available, the assay was performed on 9 adjacent tissue  
751 sections. For immunofluorescence validation studies, commercially available antibodies were  
752 used; the immunostaining included tissue from patients not contributing to omics data. Similarly,  
753 orthogonal validation of omics annotations and spatial localization in Visium studies also  
754 included more than four samples each from reference and disease biopsies that were not used  
755 to generate single cell gene expression data to further increase the reproducibility and rigor.  
756 Further, several technologies were performed on samples from the same patient and in some  
757 cases the same tissue block was used to generate multimodal data.

### 759 **Ethical Compliance**

760 We have complied with all ethical regulations related to this study. Human samples  
761 (**Supplementary Table 1**) collected as part of the Kidney Precision Medicine Project (KPMP)  
762 consortium (KPMP.org) were approved as exempted by the University of Washington  
763 Institutional Review Board. Samples as part of the Human Biomolecular Atlas Program  
764 (HuBMAP) consortium were collected by the Kidney Translational Research Center (KTRC)  
765 under a protocol approved by the Washington University Institutional Review Board (IRB  
766 #201102312). Informed consent was obtained for the use of data and samples for all  
767 participants at Washington University, including living patients undergoing partial or total  
768 nephrectomy or from discarded deceased kidney donors. For Visium Spatial Gene Expression,  
769 reference nephrectomies and diabetic kidney biopsy specimens were obtained from the KPMP  
770 or the Biopsy Biobank Cohort of Indiana (BBCI)<sup>47</sup> as approved by the Indiana University  
771 Institutional Review Board (IRB # 1906572234). Living donor biopsies as part of the Human  
772 Cell Atlas (HCA) were obtained under the Human Kidney Transplant Transcriptomic Atlas  
773 (HKTTA) under IRB HUM00150968. Deidentified leftover frozen COVID-19 AKI kidney biopsies  
774 were obtained from the Johns Hopkins University under IRB 00090103.

### 776 **Human Tissue Specimens**

777 For single nucleus omic assays, tissues were processed according to the following protocol:  
778 [dx.doi.org/10.17504/protocols.io.568g9hw](https://doi.org/10.17504/protocols.io.568g9hw). For nuclei preparation, ~7 sections of 40 µm  
779 thickness were collected and stored in RNAlater solution (RNA assays) or kept on dry ice (AC  
780 assays) until processing or used fresh. To confirm tissue composition, 5 µm sections flanking  
781 these thick sections were obtained for histology and the relative amount of cortex or medulla  
782 composition including glomeruli was determined. For single cell omic assays, tissues used (15  
783 CKD, 12 AKI and 18 LD biopsy cores) were preserved using CryoStor® (Stemcell  
784 Technologies).

### 786 **RNA-Sequencing, QC and Clustering**

787 Isolation of single nuclei. Nuclei were isolated from cryosectioned tissues according to the  
788 following protocol: [dx.doi.org/10.17504/protocols.io.ufketkw](https://doi.org/10.17504/protocols.io.ufketkw) with the exception that 4',6-

789 diamidino-2-phenylindole (DAPI) was excluded from the nuclear extraction buffer and only used  
790 to stain a subset of nuclei used for counting. Nuclei were used directly for omic assays.

791

792 Isolation of single cells. Single cells were isolated from frozen tissues according to the following  
793 protocol: [dx.doi.org/10.17504/protocols.io.7dthi6n](https://doi.org/10.17504/protocols.io.7dthi6n). The single cell suspension was immediately  
794 transferred to the University of Michigan Advanced Genomics Core facility for further  
795 processing.

796

797 10X Chromium v3 (Cv3) RNA-sequencing. 10X single nucleus RNA sequencing was performed  
798 according to [dx.doi.org/10.17504/protocols.io.86khzcxw](https://doi.org/10.17504/protocols.io.86khzcxw), and the 10X single cell RNA sequencing  
799 according to [dx.doi.org/10.17504/protocols.io.7dthi6n](https://doi.org/10.17504/protocols.io.7dthi6n), both using the 10X Chromium Single-Cell  
800 3' Reagent Kit v3. Sample demultiplexing, barcode processing, and gene expression  
801 quantifications were performed with the 10X Cell Ranger v3 pipeline using the GRCh38 (hg38)  
802 reference genome. For single nucleus data, introns were also included in the expression  
803 estimates.

804

805 SNARE-Seq2 dual RNA and ATAC-sequencing. SNARE-Seq2<sup>16</sup>, as outlined (Nature Protocols,  
806 DOI:10.1038/s41596-021-00507-3), was performed according to the following protocol:  
807 [dx.doi.org/10.17504/protocols.io.be5gjg3w](https://doi.org/10.17504/protocols.io.be5gjg3w). AC and RNA libraries were sequenced separately  
808 on the NovaSeq 6000 (Illumina) system using the 300 cycle and 200 cycle reagent kits,  
809 respectively.

810

811 SNARE-Seq2 Data Processing. Detailed step-by-step processing for SNARE-Seq2 data has  
812 been outlined (Nature Protocols, DOI:10.1038/s41596-021-00507-3). This has now been  
813 implemented as an automated data processing pipeline that is available at  
814 [github.com/huqiwen0313/snarePip](https://github.com/huqiwen0313/snarePip). The pipeline provides an automated framework for complex  
815 single-cell analysis including quality assessment, doublet removal, cell clustering and  
816 identification, robust peak generation and differential accessible region identification with flexible  
817 analysis modules and generating summary reports for both quality assessment and downstream  
818 analysis. The directed acyclic graph was used to incorporate the entire data processing steps  
819 for better error control and reproducibility. For RNA processing, this involved removal of AC  
820 contaminating reads using cutadapt (version 3.1)<sup>48</sup>, dropEst (version 0.8.6)<sup>49</sup> to extract cell  
821 barcodes and STAR (v2.5.2b)<sup>50</sup> to align tagged reads to the genome (GRCh38). For AC data,  
822 this involved snaptools (version v1.2.3)<sup>51</sup> and minimap (version 2-2.20)<sup>52</sup> for alignment to the  
823 genome (GRCh38).

824

825 Quality control of sequencing data.

826 10X snRNA-seq (snCv3): Cell barcodes passing 10X Cell Ranger filters were used for  
827 downstream analyses. Mitochondrial transcripts (MT-\*) were removed, doublets were identified  
828 using the DoubletDetection software (v2.4.0)<sup>53</sup> and removed. All samples were combined across  
829 experiments and cell barcodes having greater than 200 and less than 7500 genes detected  
830 were kept for downstream analyses. To further remove low quality datasets, a gene UMI ratio  
831 filter ([gene.vs.molecule.cell.filter](https://github.com/hms-dbmi/pagoda2)) was applied using Pagoda2 ([github.com/hms-dbmi/pagoda2](https://github.com/hms-dbmi/pagoda2)).

832

833 10X scRNA-seq (scCv3): As a quality control step, a cutoff of < 50% mitochondrial reads per  
834 cell was applied. The ambient mRNA contamination was corrected using SoupX (v1.5.0)<sup>54</sup>. The  
835 mRNA content and number of genes for doublets are comparatively higher than for single cells.  
836 In order to reduce doublets or multiplets from the analysis, we used a cutoff of > 500 and < 5000  
837 genes per cell.

838  
839 SNARE-Seq2 RNA: Cell barcodes for each sample were retained with the following criteria:  
840 having DropEst cell score greater than 0.9; having greater than 200 UMI detected; having  
841 greater than 200 and less than 7500 genes detected. Doublets identified by both  
842 DoubletDetection (v3.0) and Scrublet (github.com/swolock/scrublet, version 0.2.2) were  
843 removed. To further remove low quality datasets, a gene UMI ratio filter  
844 (gene.vs.molecule.cell.filter) was applied using Pagoda2.

845  
846 SNARE-Seq2 ATAC: Cell barcodes for each sample that had already passed quality filtering  
847 from RNA data were further retained with the following criteria: having tss enrichment greater  
848 than 0.15; having at least 1000 read fragments and at least 500 UMI; having fragments  
849 overlapping the promoter region ratio of greater than 0.15. Samples were only retained if they  
850 exhibited greater than 500 dual omic cells after quality filtering.

851  
852 Clustering snCv3. Clustering analysis was performed using pagoda2, where counts were  
853 normalized to the total number per nucleus, batch variations were corrected by scaling  
854 expression of each gene to the dataset-wide average. After variance normalization, all 5526  
855 significantly variant genes were used for principal component analysis. Clustering was  
856 performed at different k values (50, 100, 200, 500) based on the top 50 principal components,  
857 with cluster identities determined by the infomap community detection algorithm. The primary  
858 cluster resolution (k = 100) was chosen based on the extent of clustering observed. Principal  
859 components and cluster annotations were then imported into Seurat (version 4.0.0) and uniform  
860 manifold approximation and projection (UMAP) dimensional reduction was performed using the  
861 top 50 principal components identified using pagoda2. Subsequent analyses were then  
862 performed in Seurat. A cluster decision tree was implemented to determine whether a cluster  
863 should be merged, split further or labeled as an altered state. For this, differentially expressed  
864 genes between clusters were identified for each resolution using the FindAllMarkers function in  
865 Seurat (only.pos = TRUE, max.cells.per.ident = 1000, logfc.threshold = 0.25, min.pct = 0.25).  
866 Possible altered states were initially defined for clusters having one or more of the following  
867 features: low genes detected, high number of mitochondrial transcripts, high number of ER  
868 associated transcripts, upregulation of injury markers (*CST3*, *IGFBP7*, *CLU*, *FABP1*, *HAVCR1*,  
869 *TIMP2*, *LCN2*) or enrichment in AKI or CKD samples. Clusters (k = 100) that showed no distinct  
870 markers were assessed for altered state features, if present then these clusters were tagged as  
871 possible altered states, if absent then clusters were merged based on their cluster resolution at  
872 k = 200 or 500. If this merging would occur across major classes (epithelial, endothelial,  
873 immune, stromal) at higher k values, then these clusters were instead labeled as ambiguous or  
874 low quality (including possible multiplets). For k = 100 clusters (non-epithelial only) that did  
875 show distinct markers, their k = 50 subclusters were assessed for distinct marker genes, if  
876 present, then these clusters were split further. The remaining split and unsplit clusters were then



877 assessed for altered state features. If present they were tagged as possible altered states, if  
878 absent they were assessed as the final cluster. Annotations of clusters were based on known  
879 positive and negative cell type markers<sup>10,11,55–57</sup> (also see **Supplementary Table 5**), regional  
880 distribution of the clusters across the corticomedullary axis and altered state (including cell  
881 cycle) features. For separation of EC-DVR from EC-AEA, the combined population was  
882 independently clustered using pagoda2 and clusters associated with medullary sampling were  
883 annotated as EC-DVR. For separation of the REN cluster, stromal cells expressing *REN* were  
884 selected based on normalized expression values greater than 3.

885  
886 Annotating snCv3 Clusters. To overcome the challenge of disparate nomenclature for kidney  
887 cell annotations, we leveraged a cross-consortium effort to use the extensive knowledge base  
888 from human and rodent single-cell gene expression data sets, as well as the domain expertise  
889 from pathologists, biologists, nephrologists and ontologists<sup>10,11,19,55–58</sup> (also see **Supplementary**  
890 **Table 4, 5** and the HuBMAP ASCT+B Reporter: [hubmapconsortium.github.io/ccf-asct-reporter](https://github.com/hubmapconsortium/ccf-asct-reporter)).  
891 This allowed the adoption of a standardized anatomical and cell type nomenclature for major  
892 and minor cell types and their subclasses (**Supplementary Table 4**), showing distinct and  
893 consistent expression profiles of known markers and absence of specific segment markers for  
894 some of the cell types (**Extended Data Fig. 2a, Supplementary Table 5**). The knowledge of  
895 the regions dissected and histological composition of snCv3 data further enabled stratification of  
896 distinct cortical and outer and inner medullary cell populations (**Fig. 2b, Extended Data Fig. 1**).  
897 The cell type identities and regional locations were confirmed through orthogonal validation  
898 using spatial technologies presented here and correlations with existing human or rodent  
899 stromal, immune, endothelial and epithelial data sets<sup>3,23,55,56,58,59</sup> (**Extended Data Fig. 2b-i**).

#### 900 901 **Integrating snCv3 and SNARE2 data sets**

902 Integration of snCv3 and SNARE RNA data was performed using Seurat (v4.0.0) using snCv3  
903 as reference. All counts were normalized using SCTransform, anchors were identified between  
904 data sets based on the snCv3 pagoda2 principal components. SNARE2 data was then  
905 projected onto the snCv3 UMAP structure and snCv3 cell type labels were transferred to  
906 SNARE2 using the MapQuery function. Both data sets were then merged and umap  
907 embeddings recomputed using the snCv3 projected principal components. Integrated clusters  
908 were identified using pagoda2, with the k-nearest neighbor graph (k = 100) based on the  
909 integrated principal components and using the infomap community detection algorithm. The  
910 SNARE2 component of the integrated clusters was then annotated to the most overlapping,  
911 correlated and/or predicted snCv3 cluster label, with manual inspection of cell type markers  
912 used to confirm identities. Integrated clusters that overlapped different classes of cell types were  
913 labeled as ambiguous or low quality clusters.

#### 914 915 **Integrating snCv3 and scCv3 data sets**

916 Integration of snCv3 and scCv3 data was performed using Seurat (v4.0.0) using snCv3 as  
917 reference. All counts were normalized using SCTransform, anchors were identified between data  
918 sets based on the snCv3 pagoda2 principal components. scCv3 data was then projected onto  
919 the snCv3 UMAP structure and snCv3 cell type labels were transferred to scCv3 using the  
920 MapQuery function. Both data sets were then merged and umap embeddings recomputed using

921 the snCv3 projected principal components. Integrated clusters were identified using pagoda2,  
922 with the k-nearest neighbor graph (k = 100) based on the integrated principal components and  
923 using the infomap community detection algorithm. The scCv3 component of the integrated  
924 clusters was then annotated to the most overlapping or correlated snCv3 subclass, with manual  
925 inspection of cell type markers used to confirm identities. Cell types that could not be accurately  
926 resolved (PT-S1/PT-S2 and EC-AEA/EC-DVR) were kept merged. Integrated clusters that  
927 overlapped different classes of cell types or that were too ambiguous to annotate were  
928 considered low quality and were removed from the analysis.

929

### 930 **NSForest marker genes**

931 To identify a minimal set of markers that can identify snCv3 clusters and subclasses  
932 (subclass.l3), or scCv3 integrated subclasses (subclass.l3), we used the Necessary and  
933 Sufficient Forest<sup>60</sup> (NSForest v2, [github.com/JCVenterInstitute/NSForest/releases/tag/v2.0](https://github.com/JCVenterInstitute/NSForest/releases/tag/v2.0))  
934 software using default settings.

935

### 936 **Correlation analyses**

937 For correlation of RNA expression values between snCv3 and scCv3, or SNARE2, average  
938 scaled expression values were generated, pairwise correlations performed using variable genes  
939 identified from Pagoda2 analysis of snCv3 (top 5526 genes). For comparison with mouse single  
940 cell RNA-seq on healthy reference tissue<sup>56</sup>, raw counts were downloaded from the Gene  
941 Expression Omnibus (GEO, GSE129798). For comparison with mouse single cell RNA-seq from  
942 ischemia–reperfusion injury (IRI) tissue<sup>3</sup>, raw counts were downloaded from GEO  
943 (GSE139107). For human fibroblast and myofibroblast data<sup>23</sup>, raw counts were downloaded  
944 from Zenodo (10.5281/zenodo.4059315). For each data set, raw counts were processed using  
945 Seurat: counts for all cell barcodes were scaled by total UMI counts, multiplied by 10,000 and  
946 transformed to log space. For comparison with mouse single cell types of the distal nephron<sup>58</sup>,  
947 the precomputed Seurat object was downloaded from GEO (GSE150338). For mouse bulk  
948 distal segment data<sup>58</sup>, normalized counts were downloaded from GEO (GSE150338) and added  
949 to the “data” slot in a Seurat object. Immune cell reference data was obtained using the celldex  
950 package<sup>61</sup> using the MonacoImmuneData()<sup>59</sup> and ImmGenData()<sup>61,62</sup> functions and log counts  
951 imported into the “data” slot of Seurat. For correlation against these reference data sets,  
952 averaged scaled gene expression values for each cluster were calculated (Seurat) using an  
953 intersected set of variable genes identified for each data set (identified using Padoda2 for snCv3  
954 and Seurat for reference data sets). For immune reference correlations, a list of immune-related  
955 genes downloaded from ImmPort ([immport.org](https://immport.org)) was used instead of the variable genes. Only  
956 fine resolution immune labels having correlation greater than 0.2 were combined at the main  
957 label level for final correlation. Correlations were plotted using the corrplot package  
958 ([github.com/taiyun/corrplot](https://github.com/taiyun/corrplot)). Several of the immune annotations were further confirmed by  
959 manual comparison with recently reported data<sup>13</sup>.

960

## 961 **Computing single nucleus/cell-level expression scores**

962 To identify markers associated with altered states (degenerative or degen; adaptive - epithelial  
963 or aEpi; adaptive - stromal or aStr; cycling), snCv3 and scCv3 data were independently used to  
964 identify differentially expressed genes between reference and corresponding altered states for  
965 each subclass level 1 (subclass.l1). To ensure general state-level markers, differentially  
966 expressed genes were identified using the “FindConservedMarkers” function (grouping.var =  
967 "condition.l1", min.pct = 0.25, max.cells.per.ident = 300) in Seurat. A minimal set of general  
968 degenerative conserved genes were identified as enriched (p value < 0.05) in the degenerative  
969 state of each condition.l1 (reference, AKI and CKD) and in at least 4 of the 11 (snCv3) or 9  
970 (scCv3) subclass.l1 cell groupings. A minimal set of conserved aEpi genes were identified as  
971 enriched (p value < 0.05) in the adaptive state of each condition.l1 (reference, AKI and CKD) in  
972 both aPT and aTAL cell populations. This aEpi gene set was then further trimmed to include  
973 only those genes that were enriched within the adaptive epithelial population (aPT/aTAL) versus  
974 all others using the “FindMarkers” function and a minimum p value of 0.05 and average log<sub>2</sub> fold  
975 change > 0.6. A minimal set of conserved aStr genes were identified as enriched (p value <  
976 0.05) in the adaptive state of each condition.l1 (reference, AKI and CKD for snCv2; reference  
977 and AKI for scCv3) for stromal cells. To increase representation from MYOF in scCv3 showing a  
978 small number of these cells, MYOF-alone enriched genes (average log<sub>2</sub> fold change >= 0.6;  
979 adjusted p value < 0.05) were included for the scCv3 gene set. The aStr gene sets were then  
980 further trimmed to include only those genes that were enriched within the adaptive stromal  
981 population (aFIB and MYOF) compared to all others using the “FindMarkers” function and a  
982 minimum p value of 0.05 and average log<sub>2</sub> fold change > 0.6. A minimal set of cycling-  
983 associated genes were identified as those enriched (adjusted p value < 0.05 and average log<sub>2</sub>  
984 fold change > 0.6) in the cycling state across all associated subclass.l1 cell groupings.

985  
986 Scores for altered state, ECM and for gene sets associated with aging or SASP were computed  
987 for each cell from averaged normalized counts using only the genes showing a minimum  
988 correlation to the averaged whole gene set of 0.1<sup>23</sup> ([github.com/mahmoudibrahim/KidneyMap](https://github.com/mahmoudibrahim/KidneyMap)).  
989 Aging and SASP genes were obtained from the Tabula Muris Consortium (top 20 genes  
990 upregulated in aging kidney)<sup>46</sup>, Takemon et al. (genes from Table S3, group.age A<sup>63</sup>), Ruscetti  
991 et al.(SASP genes from Figure 2c)<sup>64</sup> or Basisty et al.(from Table S1 sheet IR Epithelial SASP,  
992 having a positive AVE log<sub>2</sub> ratio)<sup>65</sup>.

993

## 994 **Gene Set Enrichment Analyses (GSEA)**

995 To compute gene set enrichments for aPT and aTAL, conserved genes differentially expressed  
996 in the adaptive over reference states were identified as indicated above. Gene set ontologies  
997 from the Molecular Signatures Database (MSigDB) were downloaded from [gsea-msigdb.org](https://www.gsea-msigdb.org)  
998 and pathway enrichments computed using fgsea<sup>66</sup> and gage<sup>67</sup>, keeping only GO that were  
999 significant (p < 0.05) for both. Redundant pathways were collapsed using the fgsea function  
1000 “collapsePathways” and visualized using the ggplot.

1001  
1002 **SNARE2 AC analyses**  
1003 SNARE2 chromatin data was analysed using Signac<sup>68</sup> (v1.1.1). Peak calling was performed  
1004 using the “CallPeaks” function and MACS (v3.0.0a6, [github.com/macs3-project/MACS](https://github.com/macs3-project/MACS))  
1005 separately for clusters, subclass.l1 and subclass.l3 level annotations. Peak regions were then  
1006 combined and used to generate a peak count matrix using the “FeatureMatrix” function, then  
1007 used to create a new assay within the SNARE2 Seurat object using the  
1008 “CreateChromatinAssay” function. Gene annotation of the peaks was performed using  
1009 “GetGRangesFromEnsDb(ensdb = EnsDb.Hsapiens.v86)”. TSS enrichment, nucleosome signal  
1010 and blacklist fractions were all computed using Signac. Jaspar motifs (JASPAR2020, all  
1011 vertebrate) were used to generate a motif matrix and motif object that was added to the Seurat  
1012 object using the “AddMotifs” function. For motif activity scores, chromVAR<sup>69</sup> (v1.12.0,  
1013 [greenleaflab.github.io/chromVAR](https://greenleaflab.github.io/chromVAR)) was performed using the “RunChromVAR” function. The  
1014 chromVAR deviation score matrix was then added to a separate assay slot of the Seurat object.  
1015 For visualization of the chromatin data, UMAP embeddings were computed from cis-regulatory  
1016 topics that were identified through Latent Dirichlet Allocation (LDA) using CisTopic<sup>70</sup> (v0.3.0)  
1017 ([github.com/aertslab/cisTopic](https://github.com/aertslab/cisTopic)) and the “runCGSModels” function. Only regions accessible in 50  
1018 nuclei and nuclei having 200 of these accessible regions were used for cisTopic and  
1019 downstream analyses. The umap coordinates for the remaining nuclei were added to the Seurat  
1020 object. To ensure high quality AC profiles, only clusters having more than 50 nuclei were  
1021 retained for downstream analyses (**Supplementary Table 7**).

1022

### 1023 **Differentially Accessible Site (DAR) analyses**

1024 Sites that were differentially accessible for a given cell grouping (subclass) were identified  
1025 against a selection of background cells having best matched total peak counts, in order to best  
1026 account for technical differences in the total accessibility for each cell. For this, the total peaks in  
1027 each cell were used for estimation of the distribution of total peaks (depth distribution) for the  
1028 cells belonging to the test cluster, and 10,000 background cells having a similar depth  
1029 distribution as the test cluster were randomly selected. DARs were then identified as  
1030 significantly enriched in the positive cells over selected background cells using the  
1031 “CalcDiffAccess” function ([github.com/yanwu2014/chromfunks](https://github.com/yanwu2014/chromfunks)), where p-values were calculated  
1032 using a Fisher’s Exact Test on a hypergeometric distribution and adjusted p-values (or q-values)  
1033 were calculated using the Benjamini & Hochberg (BH) method. For subclass level 2 DARs,  
1034 VSM/P clusters were merged and the MD was combined with C-TAL prior to DAR calling.  
1035 Subclasses having >100 DARs with q value < 0.01 were used for further analysis. Co-  
1036 accessibility between all peak regions was computed using Cicero<sup>71</sup> (v1.8.1). Sites were then  
1037 linked to genes based on co-accessibility with promoter regions, occurring within 3000 base  
1038 pairs of a gene’s transcriptional start site (TSS), using the “RegionGeneLinks” function  
1039 ([github.com/yanwu2014/chromfunks](https://github.com/yanwu2014/chromfunks)) and the ChIPSeeker package<sup>72</sup>. DARs associated with  
1040 markers for each subclass (identified at the subclass.l2 level using snCv3, p value < 0.05) and  
1041 showing q value < 0.01 and log fold change > 1 were selected for visualization. For this, DAR  
1042 accessibility (peak counts) were averaged, scaled (trimming values to a minimum of 0 and a

1043 maximum of 5) and visualized using the ggHeat plotting function of the SWNE package<sup>73</sup>. Motif  
1044 enrichment within cell type DARs were computed using the hypergeometric test (“FindMotifs”  
1045 function) in Signac.

1046

### 1047 **Transcription factor analyses**

1048 To identify active TFs from SNARE2 AC data, differential activities (or deviation scores) of TFBS  
1049 between different populations were assessed using the “Find[All]Markers” function through  
1050 logistic regression and using the number of peak counts as a latent variable. Only TFs with  
1051 expression detected within the corresponding cluster, subclass or state grouping were included.  
1052 For PT and TAL clusters, TFBSs that were differentially active (p value < 0.05, average log2 fold  
1053 change > 0.35) and associated with TFs with expression detected in at least 2.5% of nuclei  
1054 (SNARE2) were identified between clusters. Common aPT/aTAL TFBS activities were identified  
1055 from an intersection of those differentially active and expressed within adaptive PT and TAL  
1056 clusters. For aPT and aTAL trajectory modules, TFBSs showing differential activity between  
1057 modules (adjusted p value < 0.05, average log2 fold change > 0.35) and expression detected  
1058 within at least 2.5% of nuclei/cells (snCv3/scCv3) were identified. For common degenerative  
1059 state TFBS activities, differentially active TFBS were identified between reference and  
1060 degenerative states for each level 1 subclass (**Supplementary Table 13**). Significant  
1061 degenerative state TFBS activities (p value < 0.05, average log2 fold change > 0.35) in 3 or  
1062 more subclass.l1 were trimmed to those showing expression detected in more than 20 percent  
1063 of the degenerative state nuclei/cells for snCv3/scCv3.

1064

### 1065 **Ligand-receptor interaction analyses**

1066 Ligand-receptor analyses were performed using the CellPhoneDB python package (v2.1.7,  
1067 [github.com/Teichlab/cellphonedb](https://github.com/Teichlab/cellphonedb)) by running the statistical method on select subclasses or  
1068 trajectory (aPT, aTAL) modules. Only interactions for secreted ligands that were not associated  
1069 with integrins were visualized using ggplot. Ordering of the ligand-receptor interactions was  
1070 based on hierarchical clustering (ward.D2 method) using the ggdendro (v0.1.20) package.  
1071 Circos plots to summarize the number of interactions from one subclass subset to another were  
1072 performed using the circlize package ([github.com/jokergoo/circlize](https://github.com/jokergoo/circlize)).

1073

### 1074 **Plots and figures**

1075 All UMAP, feature, dot, and violin plots for snCv3, scCv3 and SNARE2 data were generated  
1076 using Seurat. Correlation plots were generated using the corrplot package. Genome coverage  
1077 plots were performed using Signac. Plots for 3D cytometry and neighborhood analysis were  
1078 generated in R with circois, ggplot2, and igrph.

1079

## 1080 **GWAS analyses**

1081 To link SNARE2 cell types to kidney GWAS traits and diseases, we first summed the binary  
1082 peak accessibility profiles for all cells belonging to the same cell type to create a pseudobulk  
1083 peak-by-subclass accessibility matrix. Pseudobulk analyses give more stable results, especially  
1084 since SNARE2 accessibility data can be sparse. To ensure sufficient coverage, we used  
1085 subclass level 2 groupings with the following modifications: VSM/P clusters were merged; MD  
1086 was combined with C-TAL; subclasses having <100 DARs with q value < 0.01 were excluded.  
1087 We used g-chromVAR<sup>74</sup> (v0.3.2), an extension of chromVAR for GWAS data, to identify cell  
1088 types with higher than expected accessibility of genomic regions overlapping GWAS-linked  
1089 SNPs. Running g-chromVAR requires first identifying GWAS-linked SNPs that are more likely to  
1090 be causal, a process known as fine-mapping. For the Chronic Kidney Failure GWAS traits, we  
1091 used existing fine-mapped SNPs from the CausalDB database, using the posterior probabilities  
1092 generated by CAVIARBF<sup>75,76</sup>. The original GWAS summary statistics files were obtained from  
1093 an atlas of genetic associations from the UK Biobank<sup>77</sup>. We manually fine-mapped the Chronic  
1094 Kidney Disease, eGFR, Blood Urea Nitrogen, and Gout traits using the same code that was  
1095 used to generate the CausalDB database ([github.com/mulinlab/CAUSALdb-finemapping-pip](https://github.com/mulinlab/CAUSALdb-finemapping-pip)).  
1096 The summary statistics for all of these traits are available at the CKDGen Consortium site  
1097 ([ckdgen.imbi.uni-freiburg.de/](https://ckdgen.imbi.uni-freiburg.de/))<sup>78,79</sup>. We also manually fine-mapped the Hypertension trait and the  
1098 original summary statistics can be found on the EBI GWAS Catalog<sup>80</sup>. We only looked at causal  
1099 SNPs with a posterior causal probability of at least 0.05 in order to ensure SNPs with low causal  
1100 probabilities did not cause false positive signals. Also, since g-chromVAR selects a semi-  
1101 random set of peaks with similar average accessibility and GC content as background peaks,  
1102 the method has an element of randomness. In order to ensure stable results, we ran g-  
1103 chromVAR 20 times and averaged the results. Cluster/trait z-scores were plotted using ggheat  
1104 ([github.com/yanwu2014/swne](https://github.com/yanwu2014/swne)).

1105 To link causal SNPs to genes, we used functions outlined in the chromfunks repository  
1106 ([github.com/yanwu2014/chromfunks](https://github.com/yanwu2014/chromfunks), `/R/link_genes.R`). This involved the identification of causal  
1107 peaks for each cell type and trait (minimum peak Z score of 1, minimum peak posterior  
1108 probability score of 0.025). Sites were then linked to genes based on co-accessibility (Cicero)  
1109 with promoter regions, occurring within 3000 base pairs of a gene's transcriptional start site  
1110 (TSS). Only sites associated with genes detected as expressed in 10% of TAL nuclei/cells  
1111 (snCv3/scCv3) were included. Motif enrichment within the causal SNP and TAL associated  
1112 peaks was performed using the "FindMotifs" function in Seurat and only motifs for TFs  
1113 expressed in 10% of TAL nuclei/cells (snCv3/scCv3) were included (**Supplementary Table 28**).  
1114 For a TAL-associated ESRRB TF sub-network, peaks were linked to genes using Cicero, then  
1115 subset to those associated with TAL (C-TAL, M-TAL) marker genes that were identified using  
1116 the "Find[All]Markers" function in Seurat for subclass.l3 (p value < 0.05). TFs were then linked to  
1117 gene-associated peaks based on the presence of the motif and correlation of peak and TFBS  
1118 co-accessibility (chromVAR), using a correlation cutoff of 0.3. Only TFs with expression  
1119 detected within 20% of TAL cells or nuclei (snCv3/scCv3) were included. Eigenvector  
1120 centralities were then computed using igraph and the TF-to-gene network visualized using  
1121 "PlotNetwork" in chromfunks.

1122

## 1123 **Patient cohorts used for clinical association analyses**

1124 Neptune<sup>81</sup> (199 adult patients) and ERCB<sup>44</sup> (111 patients) expression data were used as  
1125 validation cohorts to determine the significance between patients with different levels of cell  
1126 state gene expression. NEPTUNE (NCT01209000) is a multi-center (21 sites), prospective  
1127 study of children and adults with proteinuria recruited at the time of first clinically indicated  
1128 kidney biopsy (**Supplementary Table 30**). The study participants were followed prospectively,  
1129 every 4 months for the first year, and then biannually thereafter for up to 5 years. At each study  
1130 visit, medical history, medication use, and standard local laboratory test results were recorded,  
1131 while blood and urine specimens were collected for central measurement of serum creatinine  
1132 and urine protein/creatinine ratio (UPCR) and eGFR (mL/min/1.73m<sup>2</sup>). End stage kidney  
1133 disease (ESKD) was defined as initiation of dialysis, receipt of kidney transplant or eGFR <15  
1134 mL/min/1.73m<sup>2</sup> measured at two sequential clinical visits; and the composite endpoint of kidney  
1135 functional loss by a combination of ESKD or 40% reduction in eGFR<sup>82</sup>. Genome wide  
1136 transcriptome analysis was performed on the research core obtained at the time of a clinically-  
1137 indicated biopsy using RNA-sequencing (RNA-seq) by the University of Michigan Advanced  
1138 Genomics Core using Illumina HiSeq2000. Read counts were extracted from the fastq files  
1139 using HTSeq (version 0.11). Neptune mRNA sequencing and clinical data are controlled access  
1140 data and will be available to researchers upon request to NEPTUNE-STUDY@umich.edu.

1141 ERCB is the european multicenter study that collects biopsy tissue for gene expression profiling  
1142 across 28 sites. Transcriptional profiles of biopsies from patients in the ERCB were obtained  
1143 from GEO (GSE104954).

1144

## 1145 **Clinical association of cell state scores**

1146 The gene expression data from tubulointerstitial compartment of the kidney biopsies from  
1147 Neptune patients was used to calculate the composite scores for the genes enriched in  
1148 degenerative, aPT, aTAL, and aStr states. The expression of the genes that were uniquely  
1149 enriched in the cell state (described above) and that were found in both snCv3 and scCv3 were  
1150 used to calculate the composite cell state score (**Supplementary Table 27**). Since scCv3 did  
1151 not efficiently identify all stromal cell types, the union of the enriched genes from scCv3 and  
1152 snCv3 data were used to calculate the aStr cell state score. We also generated a cell state  
1153 score for the genes that were commonly enriched in aPT and aTAL cells.

1154 For outcome analyses (40% loss of eGFR or ESKD), patient profiles were binned according to  
1155 the degree of cell state score by tertile. Kaplan-Meier (K-M) analyses were performed using log  
1156 rank tests to determine significance between patients with different levels of cell state gene  
1157 expression. In the ERCB cohort, differential expression analyses were performed between the  
1158 cell state scores in the disease group and living donors. The cell state scores for both Neptune  
1159 and ERCB bulk mRNA transcriptomics data were generated<sup>22</sup>. Briefly, the cell state scores were

1160 generated by creating Z scores for each of the cell state gene sets and then using the average  
1161 Z score as the cell state composite score.

1162

1163

### 1164 **Sample level analysis and clustering on clinical association gene sets**

1165

1166 To find association between the expression patterns of patients and clinical genesets (see  
1167 previous method). We performed sample-level clustering using the expression profiles from the  
1168 clinical genesets (**Supplementary Table 27**). All the cells from the same patient in snCv3 and  
1169 scCv3 were aggregated to get pseudo-bulk count matrices. The matrices were further normalized  
1170 by RPKM followed by tSNE dimension reduction. Groups of patients were then identified based  
1171 on k-means clustering and density based methods in the reduced spaces. Patients identified as  
1172 the same clusters were grouped together. To associate the patient pattern with clinical features,  
1173 we calculated the distribution of eGFR in each identified group (see code repo).

1174

1175 To identify genesets that best differentiate AKI and CKD patients in Adaptive PT and TAL cell  
1176 population, we trained a gene-specific logistic regression model based on the sample-level gene  
1177 expression, the model was used to assess the predictive power that differentiate AKI and CKD  
1178 patients in both snCv3 and scCv3 measured by area under the curve (AUC). The genes with AUC  
1179 > 0.65 on both snCV3 and scCv3 were selected for downstream analysis (**Supplementary Table**  
1180 **29**).

1181

### 1182 **Pseudo-time analysis of PT and TAL cells**

1183 To find cells associated with disease progression, we performed trajectory analysis for PT and  
1184 TAL cells. To get accurate pseudo-time and trajectory estimation, we removed degenerative cell  
1185 populations in both PT and TAL and inferred the trajectory for single nuclei and single cell  
1186 separately using the Slingshot package<sup>83</sup> (Verson: 2.0.0). We specified normal cell populations  
1187 as the start points for trajectory inference (S1-S3 in PT and M-TAL in TAL) using Slingshot  
1188 parameter start.clus. The correspondent trajectory embedding was visualized using  
1189 plotEmbedding function in the pagoda2 package.

1190 To identify if the gene expression was statistically significantly associated with the inferred  
1191 trajectory, we modeled the expression of a gene as a function of the estimated pseudo-time by  
1192 fitting a gam model with cubic spline regression using formula  $\text{exp}_i \sim t$ , where  $t$  is the pseudo-time.  
1193 The model is then compared to a reduced model  $\text{exp}_i \sim 1$  to get p-value estimates using F-test.  
1194 Benjamini-Hochberg method was used to calculate the adjusted p-values. To further identify the  
1195 conditional differences of expression along the trajectory, we extended the base gam model by  
1196 fitting a conditional-smooth interaction using "CKD" as a reference. The significant results for the  
1197 extended model show the genesets whose expression levels are conditionally different along the  
1198 inferred trajectory. We visualized the smoothed curve along with expression values for specific  
1199 genes as a function of pseudo-time, which was implemented in plot\_gene\_pseudotime function  
1200 (see code repo).



1201

## 1202 **Gene module detection and cell assignment**

1203 To identify expression modules for significant gene sets along estimated trajectory, we applied  
1204 the module detection algorithm implemented in WGCNA package<sup>84</sup> (Version: 1.70-3) based on  
1205 the smoothed gene expression matrix with parameters softPower=10 and minModuleSize=20.  
1206 The similar modules detected by the original parameters were further merged. In total, we  
1207 identified 5 different modules in PT and 6 modules in TAL cells. For the genesets in each  
1208 module, we further performed pathway analysis using the Reactome online tool<sup>85</sup>  
1209 ([reactome.org/PathwayBrowser/](http://reactome.org/PathwayBrowser/)). In addition, to determine the direction of disease progression,  
1210 we investigated the enrichment of clinical associated gene sets for each module by performing  
1211 log ratio enrichment tests (Extended Data Fig. 12c, g).

1212 To identify cells that are associated with each module, we developed a systematic approach.  
1213 Briefly, for the cells in the smoothed expression matrix, we performed dimension reduction using  
1214 PCA followed by louvain clustering. This allowed identification of cell clusters along the  
1215 trajectory. For the identified cell clusters, we then did hierarchical clustering to calculate the  
1216 correlation of each module based on mean gene expression values and further linked the  
1217 clusters with associated modules by cutting the hierarchical tree. Finally, module labels for each  
1218 cell were assigned based on its associated clusters. To link scCv3 data sets with snCv3  
1219 modules, we performed k-means clustering based on the joint embedding of PT/TAL cells and  
1220 assigned the cells in scCv3 to modules based on the majority voting from its k's nearest  
1221 neighbors (see code repo).

1222 To further investigate cluster-free compositional change between disease conditions, we also  
1223 performed cell density analysis, where we compared the normalized cell density between AKI  
1224 and CKD conditions through 2D kernel estimates using Cacao Package  
1225 ([github.com/kharchenkolab/cacao](https://github.com/kharchenkolab/cacao)). Z-scores were calculated to identify the regions that showed  
1226 significant differences of cell density.

1227

## 1228 **SLIDE-Seq2**

1229 Puck preparation and sequencing. Tissue pucks were prepared and sequenced<sup>18,86</sup> according to  
1230 the step-by-step protocol: [dx.doi.org/10.17504/protocols.io.bvv6n69e](https://dx.doi.org/10.17504/protocols.io.bvv6n69e). Libraries were sequenced  
1231 on a NovaSeq S2 flowcell (NovaSeq 6000) with a standard loading concentration of 2nM (read  
1232 structure: Read 1 - 42 bp, Index 1 - 8 bp, Read 2 - 60 bp, Index 2 - 0 bp). Demultiplexing,  
1233 genome alignment and spatial matching was performed using Slide-seq tools  
1234 [github.com/MacoskoLab/slideseq-tools/releases/tag/0.1](https://github.com/MacoskoLab/slideseq-tools/releases/tag/0.1).

1235

1236

1237 Deconvolution. We used Giotto<sup>87</sup> (version 1.0.3) for handling the slide-seq data and RCTD<sup>88</sup>  
1238 (version 1.1.0) for the cell type deconvolution. Since only reference tissue was used for slide-  
1239 seq and it only contained the kidney cortex, all degenerative states and medullary subtypes  
1240 were removed from the snCv3 cell subclasses prior to deconvolution. The counts from all beads

1241 across all pucks were pooled and deconvolved hierarchically: first, the broad subclass level 1  
1242 annotations in the Seurat object were used to deconvolve all beads (gene\_cutoff = 0.0001,  
1243 gene\_cutoff\_reg = 0.00015, fc\_cutoff = 0.4, fc\_cutoff\_reg = 0.5). The prediction weights were  
1244 normalized to sum to 100 per bead. Beads for which one cell type had a relative weight of 50%  
1245 or higher were classified as that cell type. Then, for each level 1 subclass, all classified beads  
1246 were further deconvolved using the level 2 annotation of that subclass, as well as the remaining  
1247 subclass level 1 annotations (same parameters as level 1). Classification at subclass level 2  
1248 was done similar to level 1. Note that the bulk parameters in RCTD were fitted using all beads  
1249 before subsetting the RCTD object to contain only beads confidently classified to a specific  
1250 subclass. For all further analyses, we used only those pucks for which the median UMI per bead  
1251 was higher than 100 (puck IDs with the format Puck\_20090X\_XX).

1252

1253 Cell type interaction. For each puck we first consolidated all the subclass level 2 immune  
1254 subtypes, then subsetted to those beads that had a level 2 classification (relative weights  
1255 greater than 50%). Delauney network was constructed for the remaining beads and Giotto's  
1256 "cellProximityEnrichment" was used to find the proximity enrichment of cell types at annotation  
1257 level 2. To generate the interaction plot in **Figure 2d**, the enrichment values for each cell type  
1258 pair were averaged across all pucks. The heterotypic interactions with enrichment higher than  
1259 0.6 were plotted with "cellProximityNetwork" in Giotto.

1260

1261

## 1262 **10X Visium**

1263 Human kidney tissue was prepared and imaged according to Visium Spatial Gene Expression  
1264 protocols (10x Genomics) according to the manufacturer protocol (CG000240 protocol, Visium  
1265 Tissue Preparation Guide) and as previously described<sup>89</sup>. Tissue was sectioned at 10 µm  
1266 thickness from Optimal Cutting Temperature (OCT) compound embedded blocks. A Keyence  
1267 BZ-X810 microscope equipped with a Nikon 10X CFI Plan Fluor objective was used to acquire  
1268 hematoxylin and eosin (H&E) stained brightfield mosaics which were subsequently stitched.  
1269 mRNA was isolated, libraries prepared, and sequencing was performed on an Illumina NovaSeq  
1270 6000<sup>90</sup>. mRNA was isolated from stained tissue sections after permeabilization for 12 minutes.  
1271 Released mRNA was bound to oligonucleotides in the fiducial capture areas. mRNA was then  
1272 reverse transcribed and underwent second strand synthesis, denaturation, cDNA amplification,  
1273 and SPRIselect cDNA cleanup (Visium CG000239 protocol). Space Ranger (v1.0.0) with the  
1274 reference genome GRCh38 3.0.0 was used to perform expression analysis, mapping, counting,  
1275 and clustering. Normalization was performed with SCTransform. Final data processing was  
1276 done in Seurat (v3.2.3). A transfer score system was used to assess and map the proportion of  
1277 signatures arising from each 55 µm spot. The transfer score reflects a probability between each  
1278 spot's signature and its association with a given snCv3 subclass (level 3). Seurat transfers the  
1279 snCv3 subclass labels according to the transfer score. The highest probability transfer scores  
1280 have the highest proportion mapped within each spatial transcriptomics spot pie graph. In cell  
1281 state analyses, instead of mapping the subclasses, the six cell states annotated in snCv3 were  
1282 mapped across all spots in the samples. To determine whether the 75 snCv3 subclasses (level  
1283 3) were appropriately mapped to histologic structures, the proportion of signature in each spot  
1284 was compared to a histologically validated set of six unsupervised clusters defined by Space

1285 Ranger (in **Extended Data Fig. 7D**)<sup>89</sup>. These six unsupervised clusters (glomerulus, proximal  
1286 tubule, loop of Henle, distal convoluted tubule, connecting tubule and collecting duct, and the  
1287 interstitium) had an overall alignment of 97.6% with the underlying histopathologic structures in  
1288 the H&E image.

1289

### 1290 **Label-free and multi-fluorescence large-scale 3D imaging**

1291 Kidney biopsy cores frozen in OCT from patients with acute kidney injury or chronic kidney  
1292 disease enrolled in KPMP were used for label-free imaging followed by multiplexed-  
1293 fluorescence large scale 3D imaging as outlined in the following protocol:  
1294 [dx.doi.org/10.17504/protocols.io.9avh2e6](https://dx.doi.org/10.17504/protocols.io.9avh2e6), and described in a recent publication by Ferkowicz et  
1295 al.<sup>27</sup>. Frozen biopsies were sectioned to a thickness of 50  $\mu\text{m}$  using a cryostat and then  
1296 immediately fixed in 4% fresh paraformaldehyde (PFA) for 24 hrs, and subsequently stored at  
1297 4°C in 0.25% PFA.

1298

1299 The first step in imaging consists of label-free imaging with multiphoton microscopy to collect  
1300 autofluorescence and second harmonic images of the unlabeled tissue mounted in non-  
1301 hardening mounting medium. Imaging was conducted using a Leica SP8 confocal scan-head  
1302 mounted to an upright DM6000 microscope. For large-scale imaging of tissues at submicron  
1303 resolution, the Leica Tile Scan function was used to collect a mosaic of smaller image volumes  
1304 using a high-power, high-numerical aperture objective. Leica LASX software (v. 3.5) was then  
1305 used to stitch these component volumes into a single image volume of the entire sample. The  
1306 scanner zoom and focus motor control were set to provide voxel dimensions of 0.5 x 0.5  $\mu\text{m}$   
1307 laterally and 1  $\mu\text{m}$  axially.

1308

1309 Labeling of tissue for fluorescence microscopy was preceded by washing in phosphate-buffered  
1310 saline (PBS) and blocking with PBS with 0.1% Triton X-100 (MP Biomedical) and 10% Normal  
1311 Donkey Serum (Jackson Immuno Research). Antibodies for indirect immunofluorescence were  
1312 applied first for 8-16 hours at room temperature, followed by washing cycles of PBS with 0.1%  
1313 Triton X-100. Incubation cycle with secondary antibodies occurred next, followed by washing  
1314 and finally application of directly labeled antibodies. Antibodies targeting markers for tubular  
1315 cells and structures (Aquaporin-1, Uromodulin, F-actin) and immune cells (Myeloperoxidase,  
1316 CD68, CD3, Siglec 8) were used, in addition to nuclei labeling using DAPI (**Supplementary**  
1317 **Table 31**). After final washing cycles, the tissue was mounted in Prolong Glass (Thermo Fisher).

1318

1319 Confocal microscopy was conducted using a Leica 20x 0.75 NA multi-immersion objective  
1320 (adjusted for oil immersion), with excitation sequentially provided by a solid state laser launch  
1321 with laser lines at 405 nm, 488 nm, 552 nm and 635 nm. Images in 16 channels (emission  
1322 spectra collected by PMT detectors adjusted for the following ranges: 410-430nm, 430-450nm,  
1323 450-470nm, 470-490 nm, 500-509nm, 510-519nm, 520-530nm, 530-540nm, 570-590nm, 590-  
1324 610nm, 610-630nm, 631-651nm, 643-664nm, 664-685nm, 685-706nm and 706-726nm) were  
1325 collected for each focal plane of each panel of the 3D mosaic. The resulting 16-channel image  
1326 is then spectrally deconvolved (via linear unmixing using the Leica LASX linear unmixing  
1327 software) to discriminate the 8 fluorescent probes in the sample. Validation of the linear  
1328 unmixing has been described in a previous publication<sup>27</sup>.

1329

### 1330 **Confocal immunofluorescence microscopy**

1331 Human kidney tissue samples from cortex or medulla were fixed in 4% PFA, cryopreserved in  
1332 30% sucrose and frozen in O.C.T cryomolds, and were cut into 5  $\mu$ m sections. Sections were  
1333 post fixed with 4% PFA for 15 min at room temperature, blocked in blocking buffer (1% BSA,  
1334 0.2% skim milk, 0.3% Triton x-100 in 1X PBS) for 30 minutes at room temperature and then  
1335 immunofluorescence microscopy was performed by first using overnight incubation at 4  $^{\circ}$ C with  
1336 primary antibodies and then followed by labeling with secondary antibodies. The primary  
1337 antibodies included NRXN-1beta, Tuj1, collagen I & III, Synapsin-1, NPSH-1, SLC14A2, UMOD,  
1338 CD31, CD34, CD11b, PROM1, KIM1, VCAM1, AQP1, AQP2, CD45 and S100 (**Supplementary**  
1339 **Table 32**). After washing, labeling with the secondary antibodies was performed using Alexa-  
1340 488 conjugated goat anti-mouse IgG, or Cy3- conjugated goat anti-rabbit IgG, or Cy5-  
1341 conjugated donkey anti-goat IgG at room temperature for one hour. After washing, sections  
1342 were counterstained with DAPI for nuclear staining. Images were acquired with a Nikon 80i C1  
1343 confocal microscope.

### 1344 **Tissue cytometry and in situ cell classification**

1345 Tissue cytometry and analysis were conducted using the Volumetric Tissue Exploration and  
1346 Analysis (VTEA) software (v1.0a-r9). VTEA is a 3D image processing workspace that was  
1347 developed as a plug-in for ImageJ/FIJ<sup>91</sup>. The version of VTEA which includes the supervised  
1348 and unsupervised labeling of cells and combining spatial and features based gating strategies  
1349 used here is available at: [github.com/icbm-iupui/volumetric-tissue-exploration-analysis](https://github.com/icbm-iupui/volumetric-tissue-exploration-analysis). In this  
1350 analytical pipeline, each individual nucleus was segmented using an intensity thresholding and  
1351 connected components segmentation built into VTEA and ImageJ. Each surveyed nucleus  
1352 became a surrogate for its cell, to which the location and marker staining around or within the  
1353 nucleus could be registered. This captured information could be used to classify cells based on  
1354 marker intensity or spatial features using scatterplot displays that allow various gating strategies  
1355 and statistical analysis, including export as .csv files of all segmented cells and the associated  
1356 features<sup>92</sup>. Cells classified based on marker intensity are summarized in **Supplementary Table**  
1357 **33**. Gated cells were mapped back directly into the image volumes, which allowed immediate  
1358 validation of the gates. In addition, direct gating on the image could be performed, which could  
1359 trace all the cells within the chosen region-of-interest back to the data display on the scatter  
1360 plot. Therefore, cell classification could also be performed based on direct annotation of  
1361 regions-of-interest (ROIs) within the image volumes.

1362

1363 Using tissue cytometry, 14 cell classes were defined based on the following features:

- 1364 • Proximal tubules (PT) cells: AQP1+ cells in cortex +/- brush border staining;
- 1365 • Cortical thick ascending limbs cells, C-TAL: UMOD+ cells in cortex
- 1366 • Glomerular cells (which encompass podocytes, glomerular endothelium and mesangial  
1367 cells) annotated ROIs based on morphology and F-actin staining
- 1368 • Cortical large and medium vessel cells: annotated ROIs based on morphology and F-  
1369 actin staining.

- 1370 ● Cortical distal nephron cells (distal tubules (CD), connecting tubules (CNT) and  
1371 collecting ducts (C-CD): AQP1-, UMOD- and annotated ROIs based on unique  
1372 morphology in cortex.
- 1373 ● Medullary thick ascending limbs cells, M-TAL: UMOD+ cells in medulla
- 1374 ● Descending thin limbs cells (DTL): AQP1+ cells in medulla
- 1375 ● Medullary collecting ducts (M-CD): AQP1-, UMOD- and annotated ROIs based on  
1376 unique morphology in medulla.
- 1377 ● Vascular bundles in the medulla (VB): annotated ROIs based on unique morphology in  
1378 medulla and F-actin staining
- 1379 ● Neutrophils: MPO+ cells
- 1380 ● Activated macrophages: MPO-, CD68+ cells
- 1381 ● T cells: CD3+ cells
- 1382 ● Cells in altered regions: annotated ROIs based on loss of (unrecognizable) tubular  
1383 morphology, expanded interstitium, increased fibrosis (by second harmonic generation  
1384 imaging) and cell infiltrates.
- 1385 ● Not determined: unable to be classified based on the criteria above

1386  
1387 Using such an approach, 1,540,563 cells were classified from all the biopsies used in this  
1388 analysis. Annotated ROIs were curated and vetted by the pixel wise agreement between 3 of 4  
1389 experts who performed the individual annotation on each biopsy specimen separately.

### 1390 1391 **3D Neighborhood building and representation**

1392  
1393 3D neighborhoods were calculated for every cell in each biopsy using VTEA and a radius of 25  
1394  $\mu\text{m}$  (50 voxels in x and y and 25 voxels in z). For each 3D neighborhood, VTEA was used to  
1395 calculate the features: fraction-of-total and sum of each labeled cell was calculated by VTEA. A  
1396 list of neighborhoods, positions in 3D and their features was exported by biopsy specimen  
1397 image as .csv files.

### 1398 1399 **Neighborhood visualization and statistical analysis**

1400  
1401 CSV files generated in VTEA for neighborhoods by biopsy specimen were imported into R (v  
1402 4.0.4), parsed for the features sum of each label and monotypic neighborhood removed. These  
1403 features were scaled by Z-standardization and used for louvain community detection (R  
1404 packages: FNN and igraph) and t-SNE manifold projection (R package: Rtsne). To understand  
1405 the interactions within neighborhoods, pairwise interactions by neighborhood were tallied and  
1406 plotted on a chord plot (R package: circlize) and Pearson's correlation coefficients were  
1407 calculated and plotted (R package: Hmisc and corrplot). Subclasses of neighborhoods, those  
1408 with at least one cell with a specific label were selected and plotted as network plots (R  
1409 package: igraph) with edges in CD3 and Altered neighborhoods scaled at 40% of all other  
1410 subclasses to facilitate visualization. All scripts are provided as an annotated RStudio notebook  
1411 file (.Rmd).

## 1412 Data Availability

1413  
1414 Raw sequencing and imaging data (snCv3, scCv3, 3D imaging) generated as part of the Kidney  
1415 Precision Medicine Project (KPMP) has been deposited at [atlas.kpmp.org](https://atlas.kpmp.org). Raw sequencing  
1416 data (snCv3, SNARE2, Slide-seq) generated as part of the Human Biomolecular Atlas Project  
1417 (HuBMAP) has been deposited at [portal.hubmapconsortium.org/](https://portal.hubmapconsortium.org/). Raw sequencing data (scCv3)  
1418 on living donor biopsies as part of the Chan Zuckerberg Initiative (CZI) and Human Cell Atlas  
1419 (HCA) will be available in the Gene Expression Omnibus (GEO) as GSE169285. Visium spatial  
1420 transcriptomic data is available in GEO as GSE171406. Neptune sequencing and clinical data is  
1421 available upon request to [NEPTUNE-STUDY@umich.edu](mailto:NEPTUNE-STUDY@umich.edu). ERCB data was obtained from GEO  
1422 as GSE104954. KPMP snCv3 and scCv3 cell types and expression profiles can be interrogated  
1423 using the KPMP Data Atlas Explorer: <https://atlas.kpmp.org/explorer>. snCv3 healthy reference  
1424 data is available for reference-based single cell mapping by the Azimuth tool:  
1425 [azimuth.hubmapconsortium.org/](https://azimuth.hubmapconsortium.org/).  
1426

## 1427 Code Availability

1428 Code to reproduce figures will be available to download from [github.com/KPMP/Cell-State-](https://github.com/KPMP/Cell-State-Atlas-2021)  
1429 [Atlas-2021](https://github.com/KPMP/Cell-State-Atlas-2021).  
1430

## 1431 Acknowledgements

1432 We are deeply indebted to the generosity of patients volunteering to donate tissue primarily for  
1433 research purposes despite no direct immediate benefit to their clinical care. We thank the KPMP  
1434 clinical coordinators at the recruitment sites for their efforts in patient enrolments and biopsy  
1435 tissue procurement, pathologists, and the Central Hub for coordinating data collection, storage  
1436 and making it accessible to the public through the consortium website. We thank the KPMP  
1437 nomenclature working group for establishing the nephron schema and standardized  
1438 nomenclature used, specifically Todd Valerius, Wilhelm Kriz, Brigitte Kaissling and Michael  
1439 Rose. We are also grateful to the HuBMAP HIVE for building the infrastructure for data storage  
1440 and public access to reference samples, in particular Jonathan Silverstein, Peter Kant, Katy  
1441 Borner and Nils Gehlenborg. We thank the Indiana Center for Biological Microscopy for imaging  
1442 assistance, Indiana Center for medical Genomics for sequencing of the 10X Visium samples  
1443 and the Indiana Biobank for hosting the BBCI. We are grateful to the Kidney Translational  
1444 Research Center (KTRC) at the Washington University (Division of Nephrology) and Mid  
1445 America Transplant in St. Louis for infrastructural support for HuBMAP samples and Steve  
1446 Steffan family in support of new omics technologies in kidney research (B1401-40 to SJ). This  
1447 publication is part of the Human Cell Atlas - [humancellatlas.org/publications](https://humancellatlas.org/publications).  
1448

1449 The snCv3 and SNARE2 sequencing data were generated at the UC San Diego IGM Genomics  
1450 Center supported by the National Institutes of Health (SIG grant #S10 OD026929) and  
1451 Washington University Genome Technology Access Center at the McDonnell Genome Institute  
1452 partially supported by NCI Cancer Center Support (#P30 CA91842) to the Siteman Cancer  
1453 Center and by ICTS/CTSA (# UL1TR002345) from the National Center for Research Resources  
1454 (NCRR). The KPMP data presented here is funded by the following grants from the NIDDK:  
1455 U2C DK114886, UH3DK114861, UH3DK114866, UH3DK114870, UH3DK114908,  
1456 UH3DK114915, UH3DK114926, UH3DK114907, UH3DK114923 and UH3DK114933. The  
1457 HuBMAP data presented here is supported by U54HL145608 (SJ and KZ). Additional NIH  
1458 support was provided by NIH/NIDDK K08DK107864 (M.T.E.); Indiana Grand Challenge  
1459 Precision Health fund (R.M.F.); R01DK111651 (TME); P30 DK079312 (TME and PCD);  
1460 U2CDK114886, U54DK083912 , P30 DK081943 / HCA: Kidney Seed Network (MKZ);  
1461 K23DK125529 (AN); U54DK083912 (SE); U01MH114828 (KKa); UH3CA246632 (EZM). The  
1462 content is solely the responsibility of the authors and does not necessarily represent the official  
1463 views of the National Institutes of Health.  
1464

## 1465 Author contributions

1466  
1467 Coordination of manuscript writing and project: B.B.L., S.J. Patient Recruitment and Tissue  
1468 Collection: A.K., A.S.N., C.P., D.S., E.H.K., F.P.W., J.C.W., J.R.S., M.K., P.M.P., R.D.T., S.J.,  
1469 S.R., S.S.W. Tissue Processing: A.K., A.S.N., D.B., D.S., E.A.O., J.R.S., M.K., M.T.E., P.C.D.,  
1470 S.J., S.R., S.W., T.M.E. RNA data generation: A.S.N., B.B.L., D.D., E.A.O., E.M., E.Z.M., F.C.,  
1471 K.S.B., K.Z., M.K., M.T.E., N.P., P.C.D., R.M., S.J., S.U., T.M.E. Imaging data generation: B.Z.,  
1472 D.B., M.T.E., P.C.D., S.J., S.W., T.M.E. ATAC data generation: B.B.L., D.D., K.Z., N.P., S.J.  
1473 Data archive / infrastructure: B.B.L., D.D., M.K., M.T.E., P.C.D., Q.H., R.M., R.M.F., S.W.,  
1474 T.M.E., X.W. Data analysis: B.B.L., D.B., E.A.O., J.P.G., K.Ka., K.Z., M.K., M.T.E., P.C.D.,  
1475 P.V.K., Q.H., R.M., R.M.F., S.E., S.J., S.W., T.M.E., X.W., Y.W. Data interpretation: A.S.N.,  
1476 A.V., B.B.L., E.A.O., J.P.G., K.Ka., K.Z., M.K., M.T.E., P.C.D., P.H., P.V.K., Q.H., R.M., R.M.F.,  
1477 S.E., S.J., S.W., T.M.E. Writing manuscript: B.B.L., K.Ka., K.Z., M.K., M.T.E., P.C.D., P.V.K.,  
1478 Q.H., R.M., R.M.F., S.J., S.W., T.M.E.

### 1479 1480 **List of collaborators:**

1481

|                   |                                |                       |
|-------------------|--------------------------------|-----------------------|
| Richard Knight    | rk.reslend@gmail.com           | AAKP                  |
| Stewart H. Lecker | slecker@bidmc.harvard.edu      | Beth Israel Deaconess |
| Isaac Stillman    | istillma@caregroup.harvard.edu | Beth Israel Deaconess |

|                          |                                  |                            |
|--------------------------|----------------------------------|----------------------------|
| Afolarin A. Amodu        | Afolarin.Amodu@bmc.org           | Boston Medical Center      |
| Titlayo Ilori            | tilori1@bu.edu                   | Boston Medical Center      |
| Shana Maikhor            | Shana.Maikhor@bmc.org            | Boston Medical Center      |
| Insa Schmidt             | Insa.Schmidt@bmc.org             | Boston Medical Center      |
| Gearoid M. McMahon       | gmmcmahon@bwh.harvard.edu        | Brigham & Women's Hospital |
| Astrid Weins             | aweins@bwh.harvard.edu           | Brigham & Women's Hospital |
| Nir Hacohen              | nhacohen@partners.org            | Broad Institute            |
| Lakeshia Bush            | BUSHL3@ccf.org                   | Cleveland Clinic           |
| Agustin Gonzalez-Vicente | agustin.gonzalezvicente@case.edu | Cleveland Clinic           |
| Jonathan Talierno        | TALIERJ@ccf.org                  | Cleveland Clinic           |
| John O'toole             | otoolej@ccf.org                  | Cleveland Clinic           |
| Emilio Poggio            | poggioe@ccf.org                  | Cleveland Clinic           |
| Leslie Cooperman         | COOPERL2@ccf.org                 | Cleveland Clinic           |
| Stacey Jolly             | JOLLYS@ccf.org                   | Cleveland Clinic           |
| Leal Herlitz             | herlitl@ccf.org                  | Cleveland Clinic           |
| Jane Nguyen              | nguyenj@ccf.org                  | Cleveland Clinic           |
| Ellen Palmer             | elp76@case.edu                   | Cleveland Clinic           |
| Dianna Sendrey           | SENDRED2@ccf.org                 | Cleveland Clinic           |



|                            |                             |                                          |
|----------------------------|-----------------------------|------------------------------------------|
| Kassandra Spates-Harden    | SPATESK2@ccf.org            | Cleveland Clinic                         |
| Paul Appelbaum             | appelba@nyspi.columbia.edu  | Columbia University                      |
| Jonathan M. Barasch        | jmb4@columbia.edu           | Columbia University                      |
| Andrew S. Bomback          | asb68@columbia.edu          | Columbia University                      |
| Vivette D. D'Agati         | vdd1@columbia.edu           | Columbia University                      |
| Karla Mehl                 | km3246@cumc.columbia.edu    | Columbia University                      |
| Pietro A. Canetta          | pac2004@cumc.columbia.edu   | Columbia University                      |
| Ning Shang                 | ns3026@cumc.columbia.edu    | Columbia University                      |
| Olivia Balderes            | ob2214@cumc.columbia.edu    | Columbia University                      |
| Satoru Kudose              |                             | Columbia University                      |
| Laura Barisoni             | laura.barisoni@duke.edu     | Duke University                          |
| Theodore Alexandrov        | theodore.alexandrov@embl.de | European Molecular Biology<br>Laboratory |
| Yinghua Cheng              |                             | Indiana University                       |
| Kenneth W. Dunn            | kwdunn@iu.edu               | Indiana University                       |
| Katherine J. Kelly         | kajkelly@iu.edu             | Indiana University                       |
| Timothy A. Sutton          | tsutton2@iu.edu             | Indiana University                       |
| Yumeng Wen                 | ywen14@jhmi.edu             | Johns Hopkins University                 |
| Celia P. Corona-Villalobos | pamelacorona@jhmi.edu       | Johns Hopkins University                 |

|                        |                                     |                          |
|------------------------|-------------------------------------|--------------------------|
| Steven Menez           | smenez1@jhmi.edu                    | Johns Hopkins University |
| Avi Rosenberg          | arosen34@jhmi.edu                   | Johns Hopkins University |
| Lois J. Arend          | jarend@jhu.edu                      | Johns Hopkins University |
| Serena M Bagnasco      | sbagnas1@jhmi.edu                   | Johns Hopkins University |
| Christopher J. Sperati | jsperati@jhmi.edu                   | Johns Hopkins University |
| Mohammed Atta          | matta1@jhmi.edu                     | Johns Hopkins University |
| Camille Johansen       | Camille.Johansen@joslin.harvard.edu | Joslin                   |
| Jennifer Sun           | Jennifer.Sun@joslin.harvard.edu     | Joslin Diabetes Center   |
| Neil Roy               | neil.roy@joslin.harvard.edu         | Joslin Diabetes Center   |
| Mark Williams          | mark.williams@joslin.harvard.edu    | Joslin Diabetes Center   |
| Joseph Ardayfio        | joseph.ardayfio@gmail.com           | KPMP Patient Partner     |
| Jack Bebiak            | jackb@gspire.org                    | KPMP Patient Partner     |
| Keith Brown            | kdblwyer@icloud.com                 | KPMP Patient Partner     |
| Catherine E. Campbell  | cec5479@yahoo.com                   | KPMP Patient Partner     |
| John Saul              | jbsaul@mac.com                      | KPMP Patient Partner     |
| Anna Shpigel           | blumkinlaw@yahoo.com                | KPMP Patient Partner     |
| Christy Stutzke        | dzinri@aol.com                      | KPMP Patient Partner     |
| Robert Koewler         | rob.koewler@gmail.com               | KPMP Patient Partner     |

|                         |                                   |                                            |
|-------------------------|-----------------------------------|--------------------------------------------|
| Taneisha Campbell       | tcampbell@giftoflifemichigan.org  | KPMP Patient Partner                       |
| Lynda Hayashi           | lyndahayashi@gmail.com            | KPMP Patient Partner                       |
| Nichole Jefferson       | nicholejeff@gmail.com             | KPMP Patient Partner                       |
| Roy Pinkeney            | 20shuvee11@gmail.com              | KPMP Patient Partner                       |
| Glenda V. Roberts       | glendar@Nephrology.washington.edu | KPMP Patient Partner                       |
| Evren U. Azeloglu       | evren.azeloglu@mssm.edu           | Mount Sinai                                |
| Cijiang He              | cijiang.he@mssm.edu               | Mount Sinai                                |
| Ravi Iyengar            | ravi.iyengar@mssm.edu             | Mount Sinai                                |
| Jens Hansen             | jens.hansen@mssm.edu              | Mount Sinai                                |
| Yuguang Xiong           | yuguang.xiong@mssm.edu            | Mount Sinai                                |
| Brad Rovin              | brad.rovin@osumc.edu              | Ohio State University                      |
| Samir Parikh            | samir.parikh@osumc.edu            | Ohio State University                      |
| Sethu M. Madhavan       | Sethu.Madhavan@osumc.edu          | Ohio State University                      |
| Christopher R. Anderton | christopher.anderton@pnnl.gov     | Pacific Northwest National<br>Laboratories |
| Ljiljana Pasa-Tolic     | ljiljana.pasatolic@pnnl.gov       | Pacific Northwest National<br>Laboratories |
| Dusan Velickovic        | dusan.velickovic@pnnl.gov         | Pacific Northwest National<br>Laboratories |
| Olga Troyanskaya        | ogt@genomics.princeton.edu        | Princeton University                       |
| Rachel Sealfon          | rsealfon@flatironinstitute.org    | Princeton University                       |

|                     |                                 |                                         |
|---------------------|---------------------------------|-----------------------------------------|
| Katherine R. Tuttle | katherine.tuttle@providence.org | Providence Health                       |
| Zoltan G. Laszik    | Zoltan.Laszik@ucsf.edu          | UC San Francisco                        |
| Garry Nolan         | gnolan@stanford.edu             | UC San Francisco                        |
| Minnie Sarwal       | Minnie.Sarwal@ucsf.edu          | UCSF                                    |
| Kavya Anjani        | Kavya.Anjani@ucsf.edu           | UCSF                                    |
| Tara Sigdel         | tara.sigdel@ucsf.edu            | University of California, San Francisco |
| Heather Ascani      | ascanihk@med.umich.edu          | University of Michigan                  |
| Ulysses GJ. Balis   | ulysses@med.umich.edu           | University of Michigan                  |
| Chrysta Lienczewski | boridley@med.umich.edu          | University of Michigan                  |
| Laura H. Mariani    | lmariani@med.umich.edu          | University of Michigan                  |
| Becky Steck         | roesch@med.umich.edu            | University of Michigan                  |
| Yongqun He          | yongqunh@med.umich.edu          | University of Michigan                  |
| Jennifer Schaub     | schaubj@med.umich.edu           | University of Michigan                  |
| Victoria M. Blanc   | vmb@med.umich.edu               | University of Michigan                  |
| Sean Eddy           | seaneddy@med.umich.edu          | University of Michigan                  |
| Raghavan Murugan    | muruganr@ccm.upmc.edu           | University of Pittsburgh                |
| Parmjeet Randhawa   | randhawapa@upmc.edu             | University of Pittsburgh                |
| Matthew Rosengart   | rosengartmr@upmc.edu            | University of Pittsburgh                |

|                     |                                       |                          |
|---------------------|---------------------------------------|--------------------------|
| Mitchell Tublin     | tublme@upmc.edu                       | University of Pittsburgh |
| Tina Vita           | vitatm@upmc.edu                       | University of Pittsburgh |
| John A. Kellum      | kellum@pitt.edu                       | University of Pittsburgh |
| Daniel E. Hall      | hallde@upmc.edu                       | University of Pittsburgh |
| Michele M. Elder    | mie1@pitt.edu                         | University of Pittsburgh |
| James Winters       | wintersj4@upmc.edu                    | University of Pittsburgh |
| Matthew Gilliam     | MJG136@pitt.edu                       | University of Pittsburgh |
| Charles E. Alpers   | calp@u.washington.edu                 | University of Washington |
| Kristina N. Blank   | blankk@u.washington.edu               | University of Washington |
| Jonas Carson        | jcarson@u.washington.edu              | University of Washington |
| Ian H. De Boer      | IDeBoer@Nephrology.washington.edu     | University of Washington |
| Ashveena L. Dighe   | ashveena@Nephrology.washington.edu    | University of Washington |
| Jonathan Himmelfarb | jhimmelfarb@nephrology.washington.edu | University of Washington |
| Sean D. Mooney      | sdmooney@u.washington.edu             | University of Washington |
| Stuart Shankland    | Sshankland@Nephrology.washington.edu  | University of Washington |
| Kayleen Williams    | kmfw@u.washington.edu                 | University of Washington |
| Christopher Park    | cpark3@nephrology.washington.edu      | University of Washington |
| Frederick Dowd      | dowdf@u.washington.edu                | University of Washington |

|                       |                             |                          |
|-----------------------|-----------------------------|--------------------------|
| Robyn L. McClelland   | rmcclell@u.washington.edu   | University of Washington |
| Stephen Daniel        | sdaniel@uw.edu              | University of Washington |
| Andrew N. Hoofnagle   | ahoof@uw.edu                | University of Washington |
| Adam Wilcox           | abwilcox@uw.edu             | University of Washington |
| Shweta Bansal         | bansals3@uthscsa.edu        | UT Health San Antonio    |
| Kumar Sharma          | sharmak3@uthscsa.edu        | UT Health San Antonio    |
| Manjeri Venkatachalam | venkatachal@uthscsa.edu     | UT Health San Antonio    |
| Guanshi Zhang         | zhangg3@uthscsa.edu         | UT Health San Antonio    |
| Annapurna Pamreddy    | pamreddy@uthscsa.edu        | UT Health San Antonio    |
| Vijaykumar R. Kakade  | vijayakumar.kakade@yale.edu | Yale University          |
| Dennis Moledina       | dennis.moledina@yale.edu    | Yale University          |
| Melissa M. Shaw       | melissa.m.shaw@yale.edu     | Yale University          |
| Ugochukwu Ugwuowo     | ugochukwu.ugwuowo@yale.edu  | Yale University          |
| Tanima Arora          | Tanima.arora@yale.edu       | Yale University          |

1482

1483

## 1484 Competing interests

1485

1486 No competing interests for the work submitted. Disclosures: P.V.K. serves on the Scientific  
1487 Advisory Board to Celsius Therapeutics Inc. and Biomage Inc. A.V. is a consultant for Astute  
1488 and NxStage; C.P. is a member of the advisory board of and owns equity in RenalytixAI, and  
1489 serves as a consultant for Genfit and Novartis; M.K. has grants from JDRF, Astra-Zeneca,

1490 NovoNordisc, Eli Lilly, Gilead, Goldfinch Bio, Janssen, Boehringer-Ingelheim, Moderna,  
1491 European Union Innovative Medicine Initiative, Chan Zuckerberg Initiative, Certa, Chinook,  
1492 amfAR, Angion Pharmaceuticals, RenalytixAI, Travers Therapeutics, Regeneron, IONIS  
1493 Pharmaceuticals, Astellas, Poxel, and a patent PCT/EP2014/073413 “Biomarkers and methods  
1494 for progression prediction for chronic kidney disease” licensed; F.C. and E.Z.M. are paid  
1495 consultants for Atlas Bio; P.M.P. is a consultant for Janssen; S.R. has research funding from  
1496 AstraZeneca and Bayer Healthcare; J.R.S. consults for Maze, Goldfinch, and receives royalties  
1497 from Sanofi Genzyme; K.Z. is a co-founder, equity holder and serves on the Scientific Advisory  
1498 Board of Singlera Genomics. A.S.N. is on the external advisory board for CareDX. S.J. is a paid  
1499 Blue SKy mentor for Meharry Medical College, Nashville and receives royalties from Elsevier  
1500 Inc.

1501

1502





1505 **Extended Data Figure 1. snCv3 cell types and quality metrics. a.** UMAP plots for snCv3  
1506 clusters, with insets showing the corresponding tissue regions, sex, patient identities and  
1507 conditions. **b.** Bar and violin plots for snCv3 patients shown in **(a)**. Barplots showing the total  
1508 number of post-QC nuclei used in the snCv3 clustering analysis, and the proportions that were  
1509 associated with level 1 subclasses, regions sampled or the health or disease conditions. Violin  
1510 plots show the percentage of transcripts associated with the mitochondria (Mt) or endoplasmic  
1511 reticulum (ER), as well as mean genes and mean transcripts detected per patient sample. **c.**  
1512 Bar and violin plots as in **(b)** for snCv3 clusters shown in **(a)**, including proportion of nuclei  
1513 contributed by each patient.  
1514  
1515

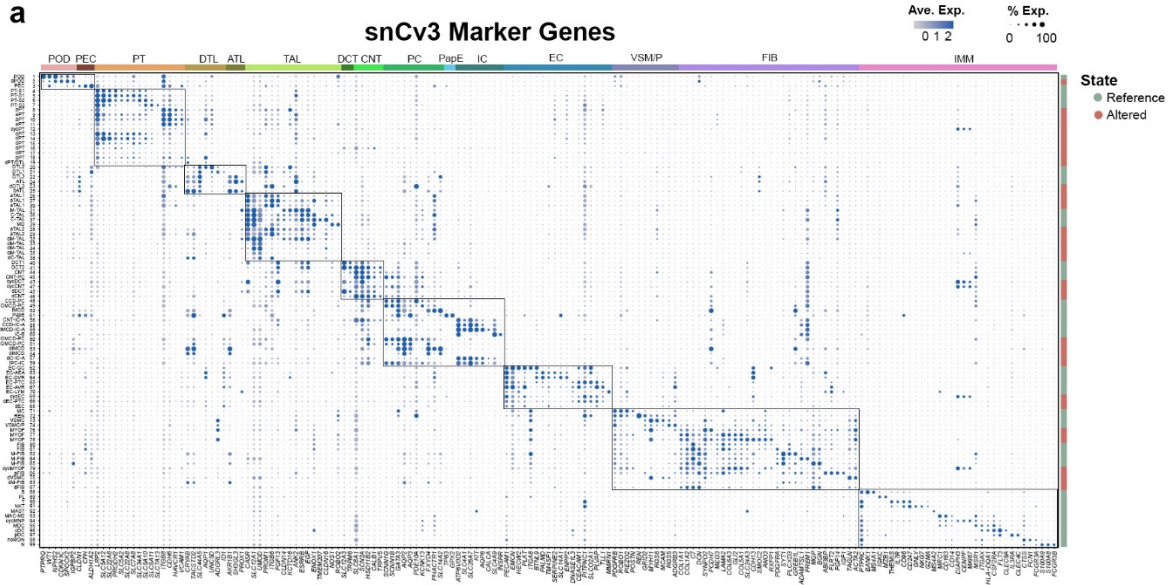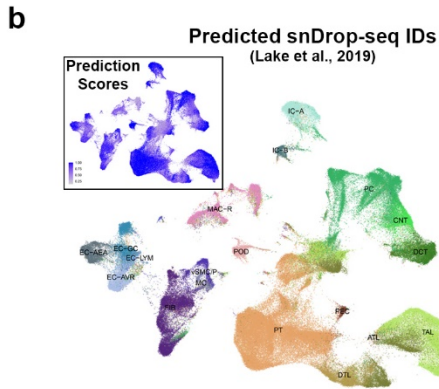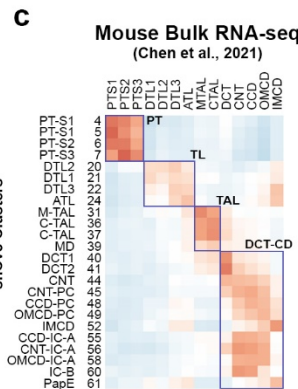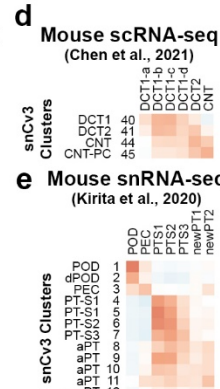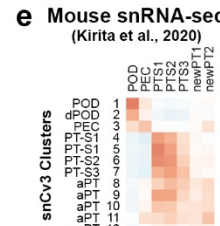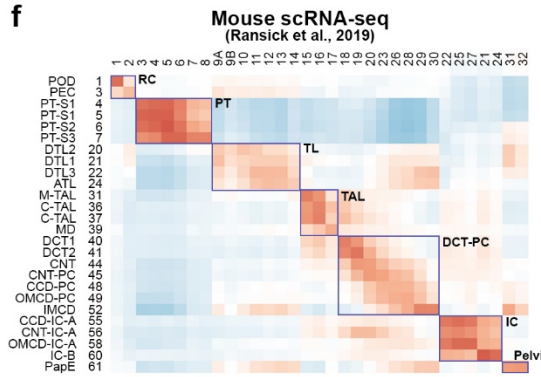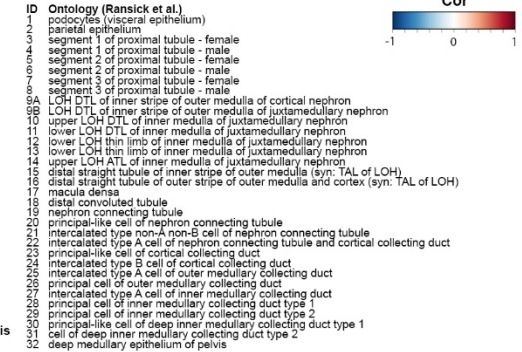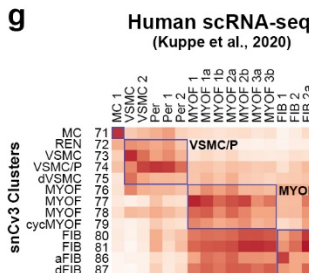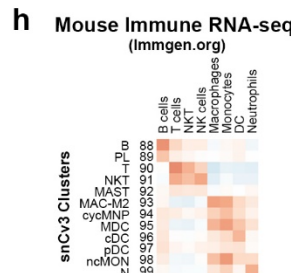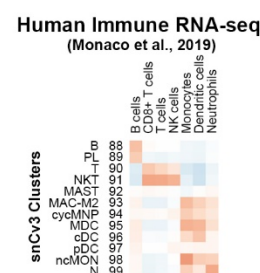

1517 **Extended Data Figure 2. snCv3 marker genes and comparison with reference data. a.** Dot  
1518 plot showing averaged marker gene expression values (log scale) and proportion expressed for  
1519 snCv3 clusters. **b.** Cell type labels predicted from Lake et. al. 2019<sup>11</sup> mapped on the snCv3  
1520 UMAP embedding. Inset shows the corresponding prediction score values. **c.** Heatmap showing  
1521 correlation of averaged scaled gene expression values for snCv3 epithelial (reference state)  
1522 clusters and mouse bulk segmental RNA-seq data from Chen et al., 2021<sup>58</sup>. **d.** Heatmap  
1523 showing correlation of averaged scaled gene expression values for snCv3 distal tubule clusters  
1524 (reference states) and mouse scRNA-seq data from Chen et al., 2021<sup>58</sup>. **e.** Heatmap showing  
1525 correlation of averaged scaled gene expression values for snCv3 clusters (reference and  
1526 altered/adaptive states) and mouse snRNA-seq clusters from Kirita et al., 2020<sup>3</sup>. **f.** Heatmap  
1527 showing correlation of averaged scaled gene expression values (reference states) for snCv3  
1528 clusters and mouse scRNA-seq clusters from Ransick et al., 2019<sup>56</sup>. **g.** Heatmap showing  
1529 correlation of averaged scaled gene expression values for snCv3 stromal clusters (reference  
1530 and altered/adaptive states) against human scRNA-seq clusters from Kuppe et al., 2020<sup>23</sup>. **h.**  
1531 Heatmap showing correlation of averaged scaled gene expression values for snCv3 immune  
1532 cell clusters and mouse immune cell types from Immgen.org. **i.** Heatmap showing correlation of  
1533 averaged scaled gene expression values for snCv3 immune cell clusters and human immune  
1534 cell types from Monaco et al. 2019<sup>59</sup>.  
1535  
1536

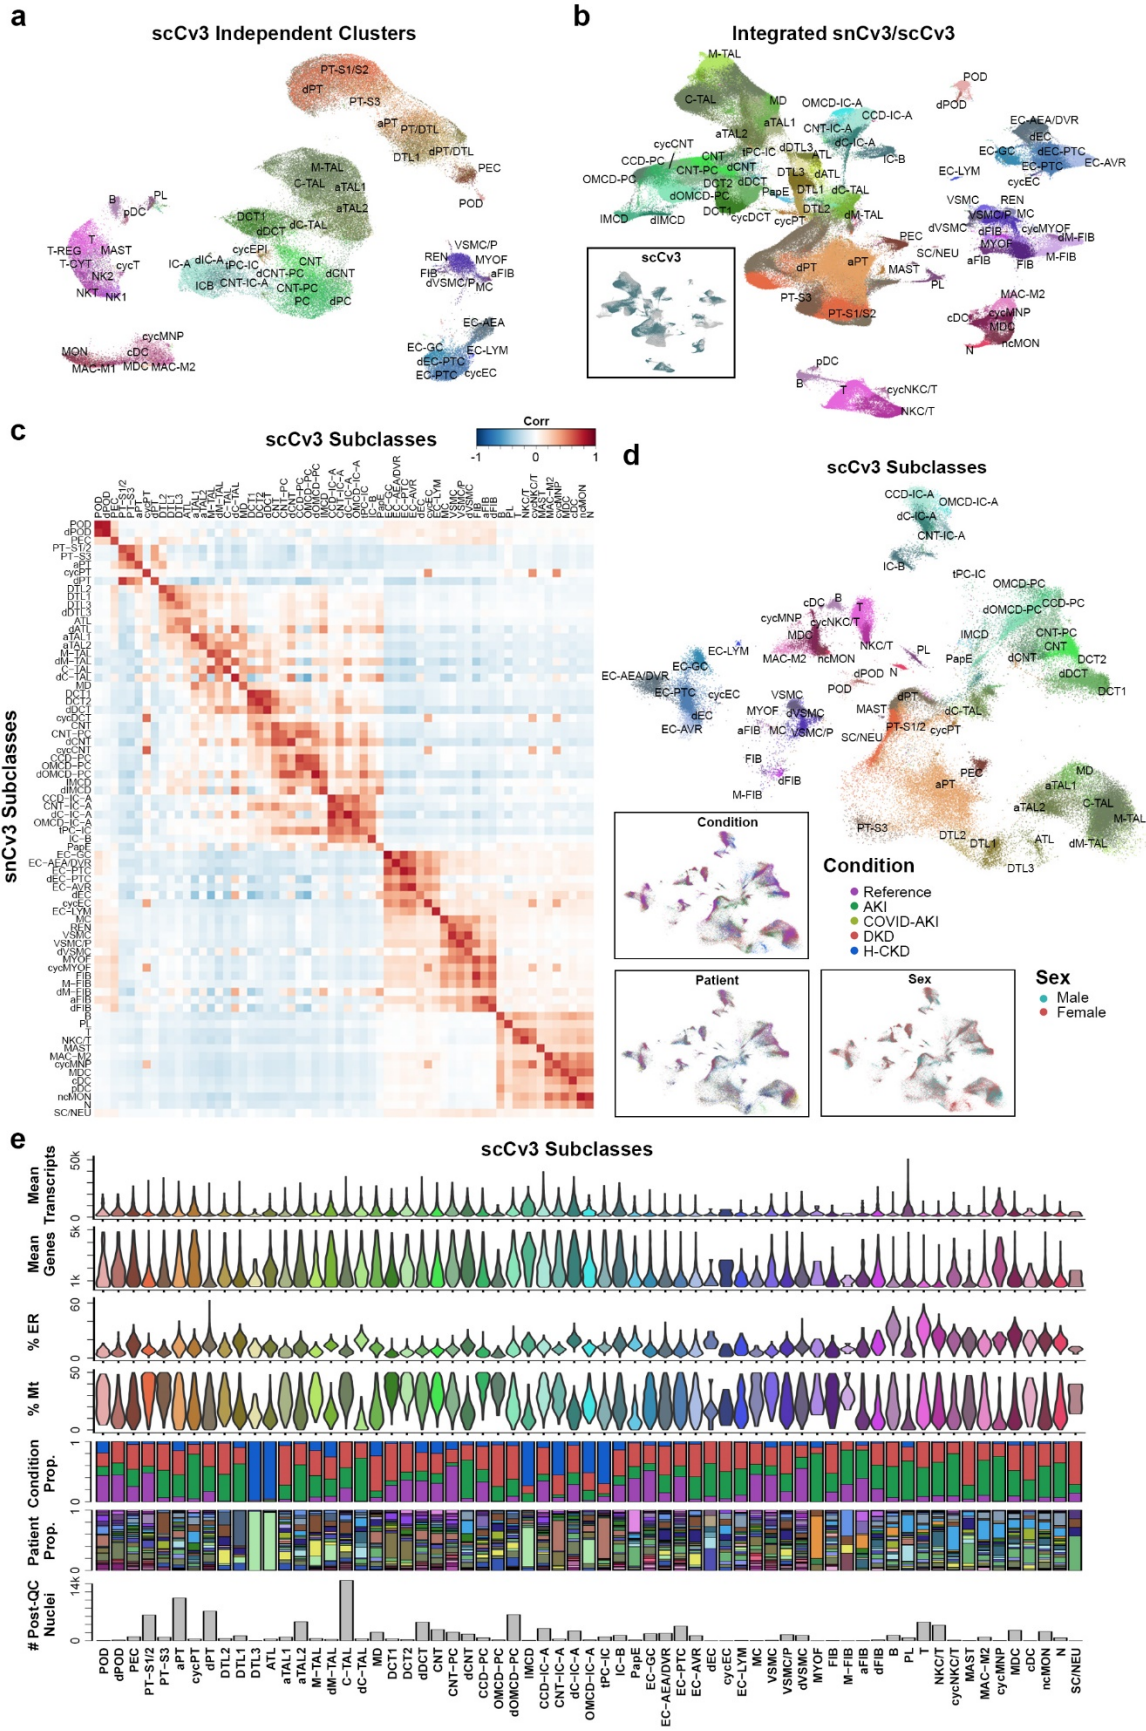

1538 **Extended Data Figure 3. scCv3 integration and quality metrics. a.** UMAP plot showing  
1539 independent clustering and annotation of scCv3 data. **b.** UMAP showing integrated snCv3 and  
1540 scCv3 clustering and harmonized subclass level 3 annotations. Inset shows location of scCv3  
1541 cells. **c.** Heatmap showing correlation of averaged scaled gene expression values for snCv3  
1542 and scCv3 using harmonized subclass level 3 annotations. **d.** UMAP plot showing scCv3 data  
1543 projected into the snCv3 embedding shown in **Fig. 2b**. Insets show mapping of the  
1544 corresponding sex, patient identities and conditions. **e.** Barplots showing the total number of  
1545 post-QC nuclei per scCv3 subclass level 3, and the proportions that were associated with  
1546 patients sampled or health/disease conditions. Violin plots show the percentage of transcripts  
1547 associated with the mitochondria (Mt) or endoplasmic reticulum (ER), as well as mean genes  
1548 and mean transcripts detected per subclass.  
1549  
1550

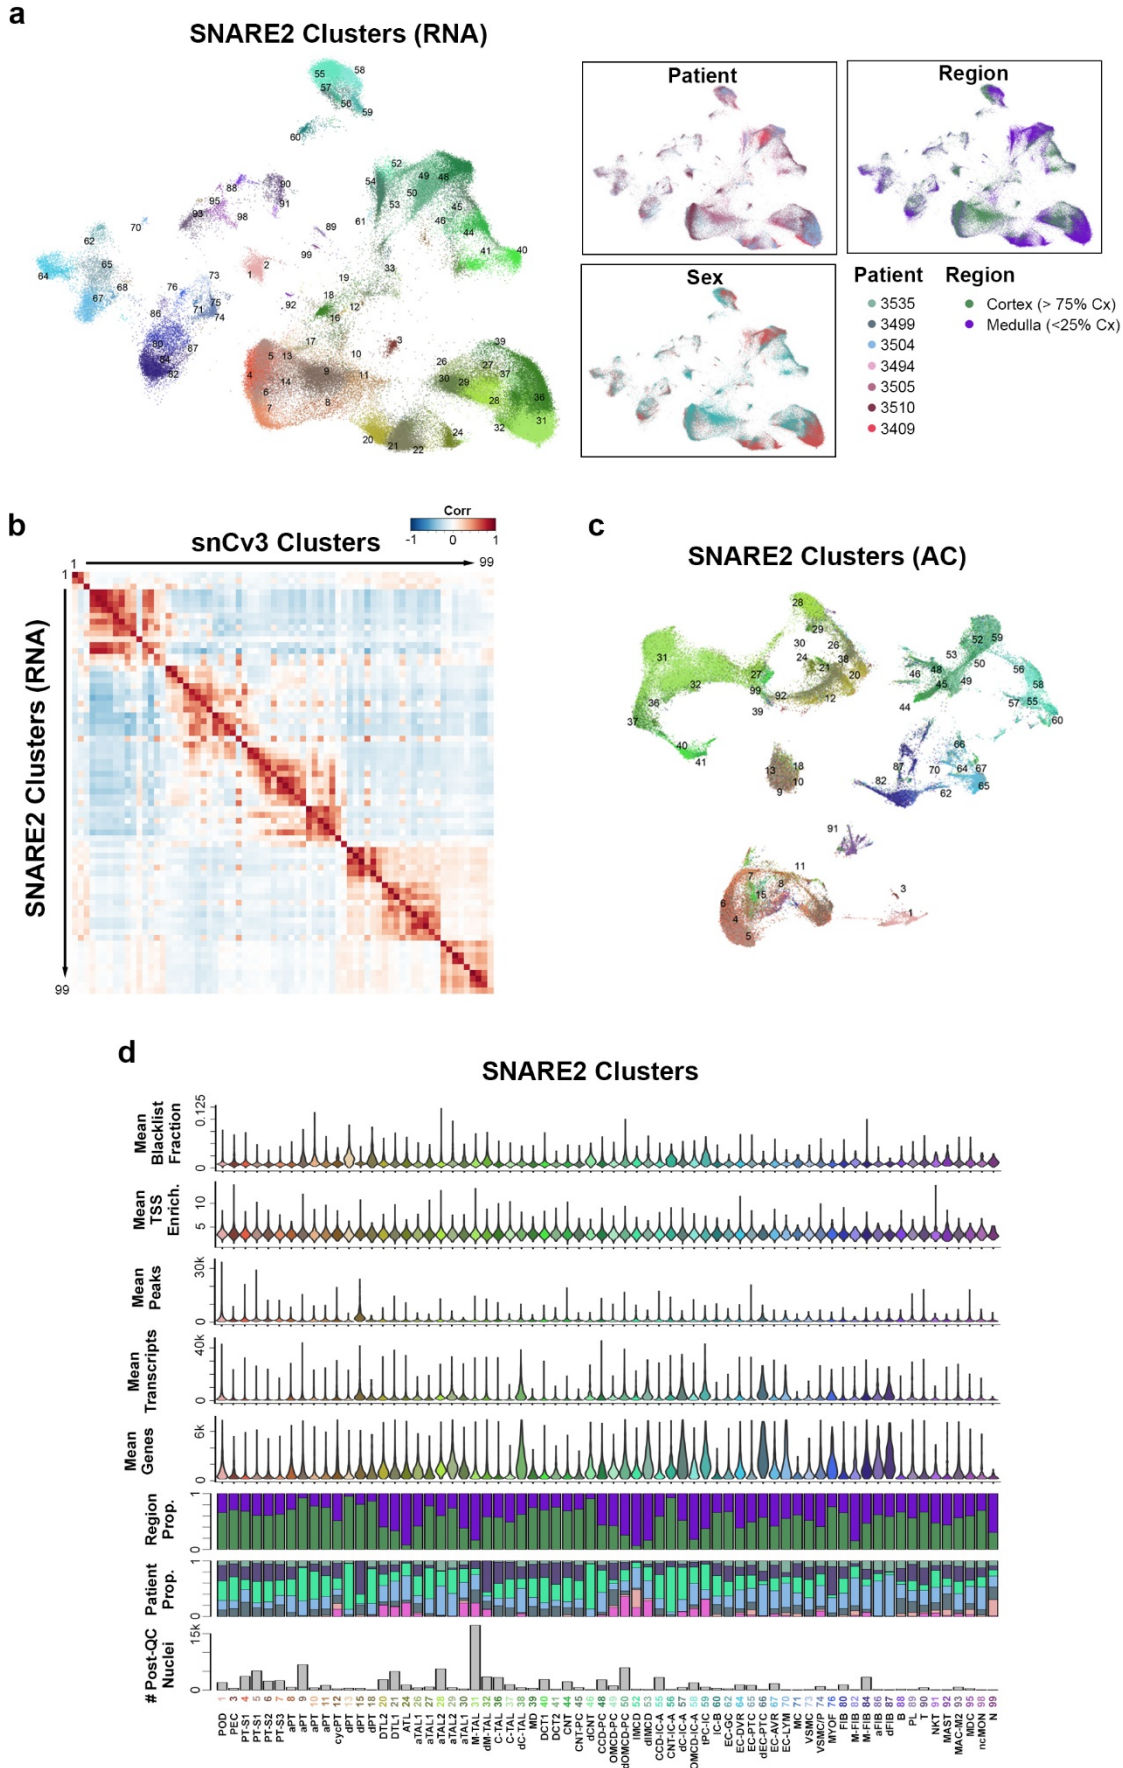

1552 **Extended Data Figure 4. SNARE2 integration and quality metrics. a.** UMAP plot showing  
1553 SNARE2 RNA data projected onto the snCv3 embedding (**Fig. 2b**) and the corresponding  
1554 harmonized cluster annotations. Insets show mapping of the tissue region, sex and patient  
1555 identities. **b.** Heatmap showing correlation of averaged scaled gene expression values for  
1556 SNARE2 and snCv3 using harmonized cluster annotations. **c.** UMAP embedding for SNARE2  
1557 AC based on Cistopic<sup>70</sup> derived embeddings and showing harmonized clusters annotations as  
1558 in (**a**). **d.** Barplots showing the total number of post-QC nuclei per SNARE2 cluster, and the  
1559 proportions that were associated with patient or region sampled. Violin plots show the mean  
1560 genes, transcripts (SNARE2 RNA) and mean peaks, TSS enrichments and blacklist fractions  
1561 (SNARE2 AC) detected per cluster.

1562

1563

1564

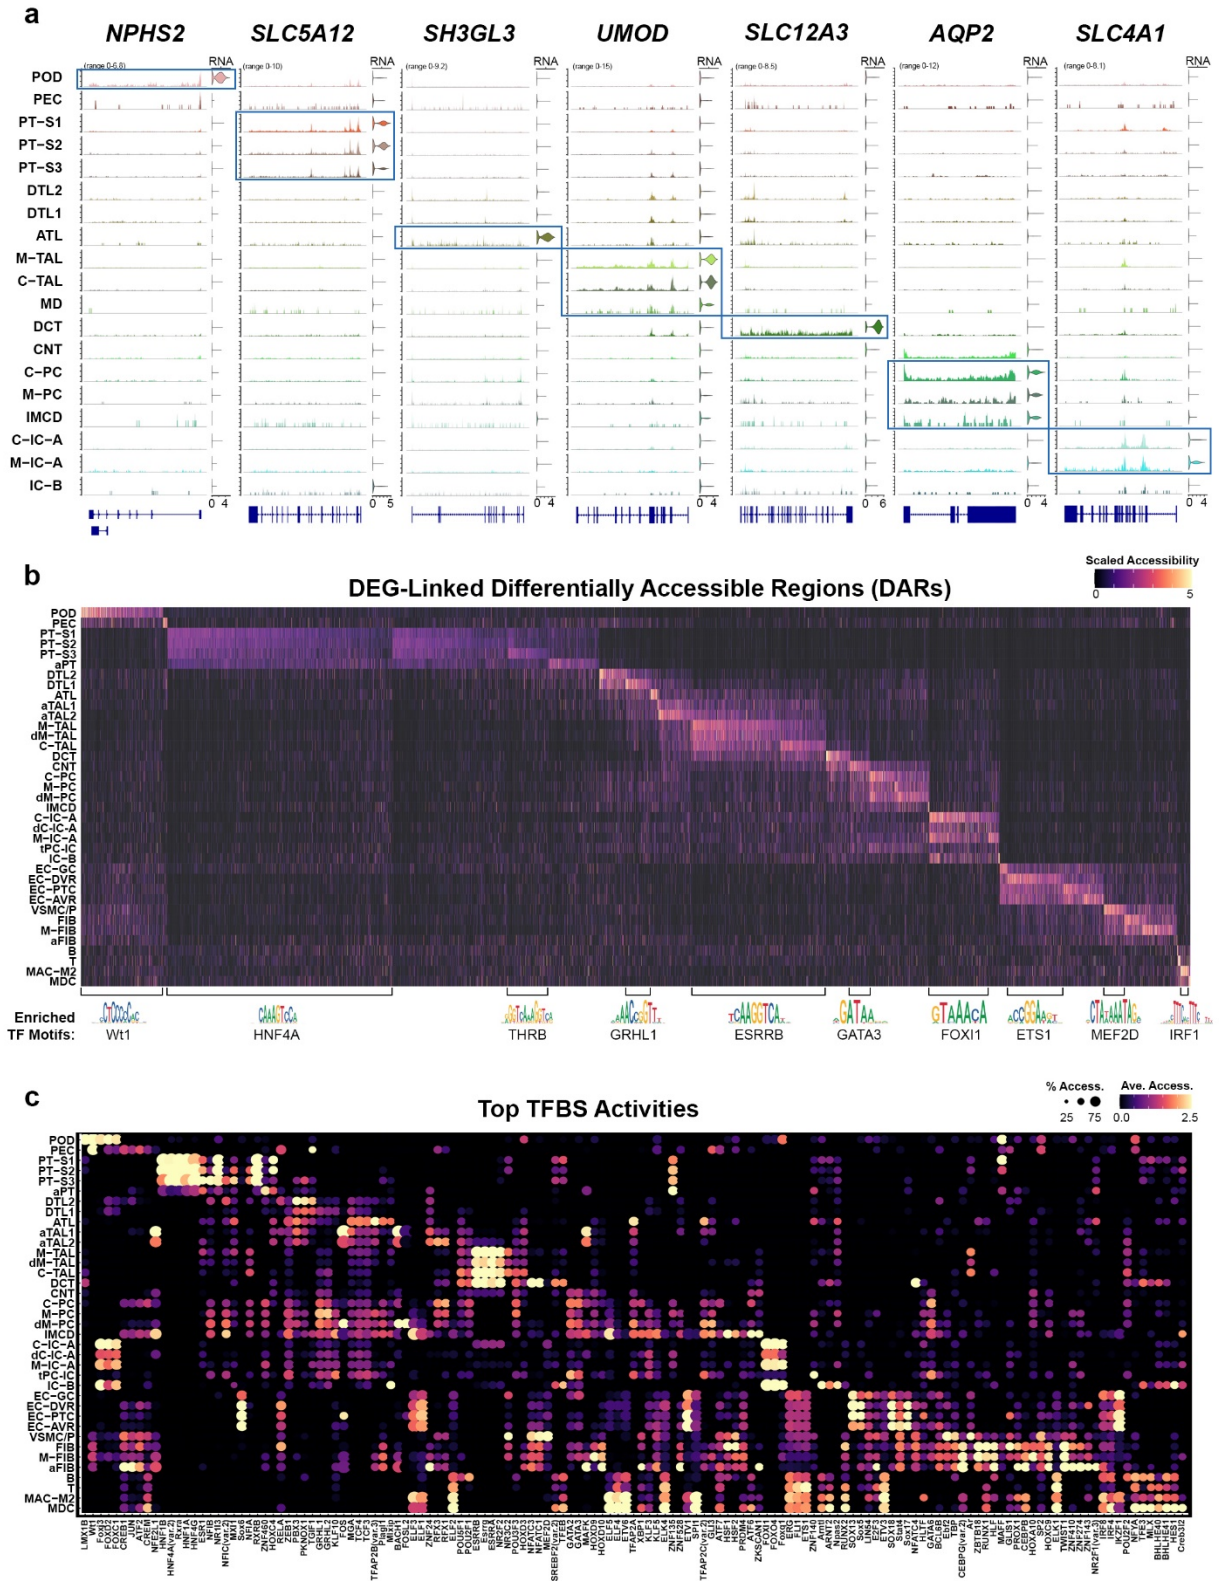



1567 **Extended Data Figure 5. SNARE2 cell type regulatory profiles. a.** Coverage plots showing  
1568 SNARE2 AC read pile-ups for genomic regions associated with cell type marker genes. Violin  
1569 plots show corresponding SNARE2 RNA gene expression values. **b.** Heatmaps showing  
1570 averaged scaled chromatin accessibility values for differentially accessible regions (DARs)  
1571 identified for cell type specific differentially expressed genes (DEGs, Methods). Select TF motifs  
1572 enriched within the cell type specific DARs are shown. **c.** Dot plots showing average TFBS  
1573 accessibilities (chromVAR) and proportion accessible for SNARE2 AC cell types.  
1574  
1575

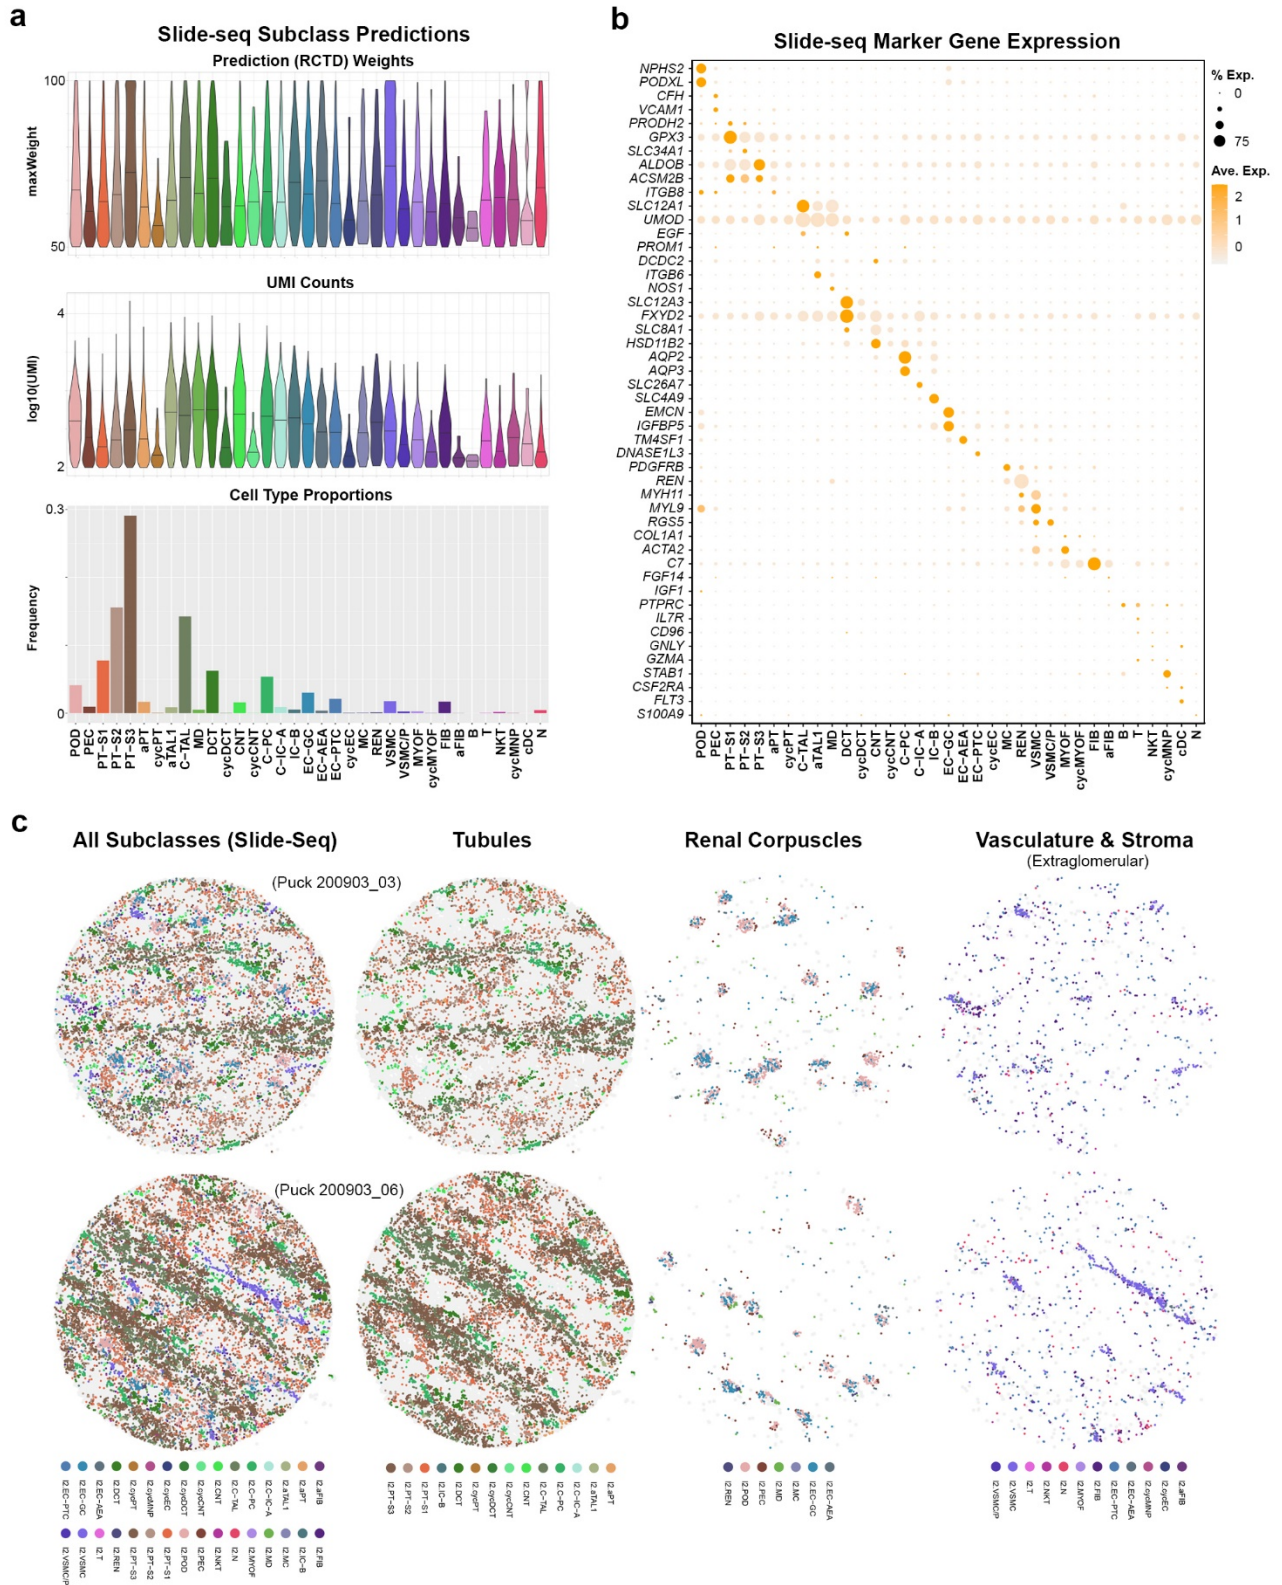

1578 **Extended Data Figure 6. Slide-seq predicted cell types. a.** Top: normalized RCTD weights  
1579 for the beads classified at subclass level 2 (Methods). Middle: UMI counts per bead for  
1580 classified beads. Bottom: relative frequency of cell types predicted across pucks. **b.** Expression  
1581 of cell type markers identified by snCv3 in the classified Slide-seq beads. **c.** Two representative  
1582 pucks showing subclass level 2 classifications. Cell types are grouped into 3 categories and  
1583 plotted separately for clarity. For panels **a** and **b**, all pucks from a single individual with median  
1584 UMI of 100 or more were pooled together. Puck diameter is 3mm.  
1585  
1586

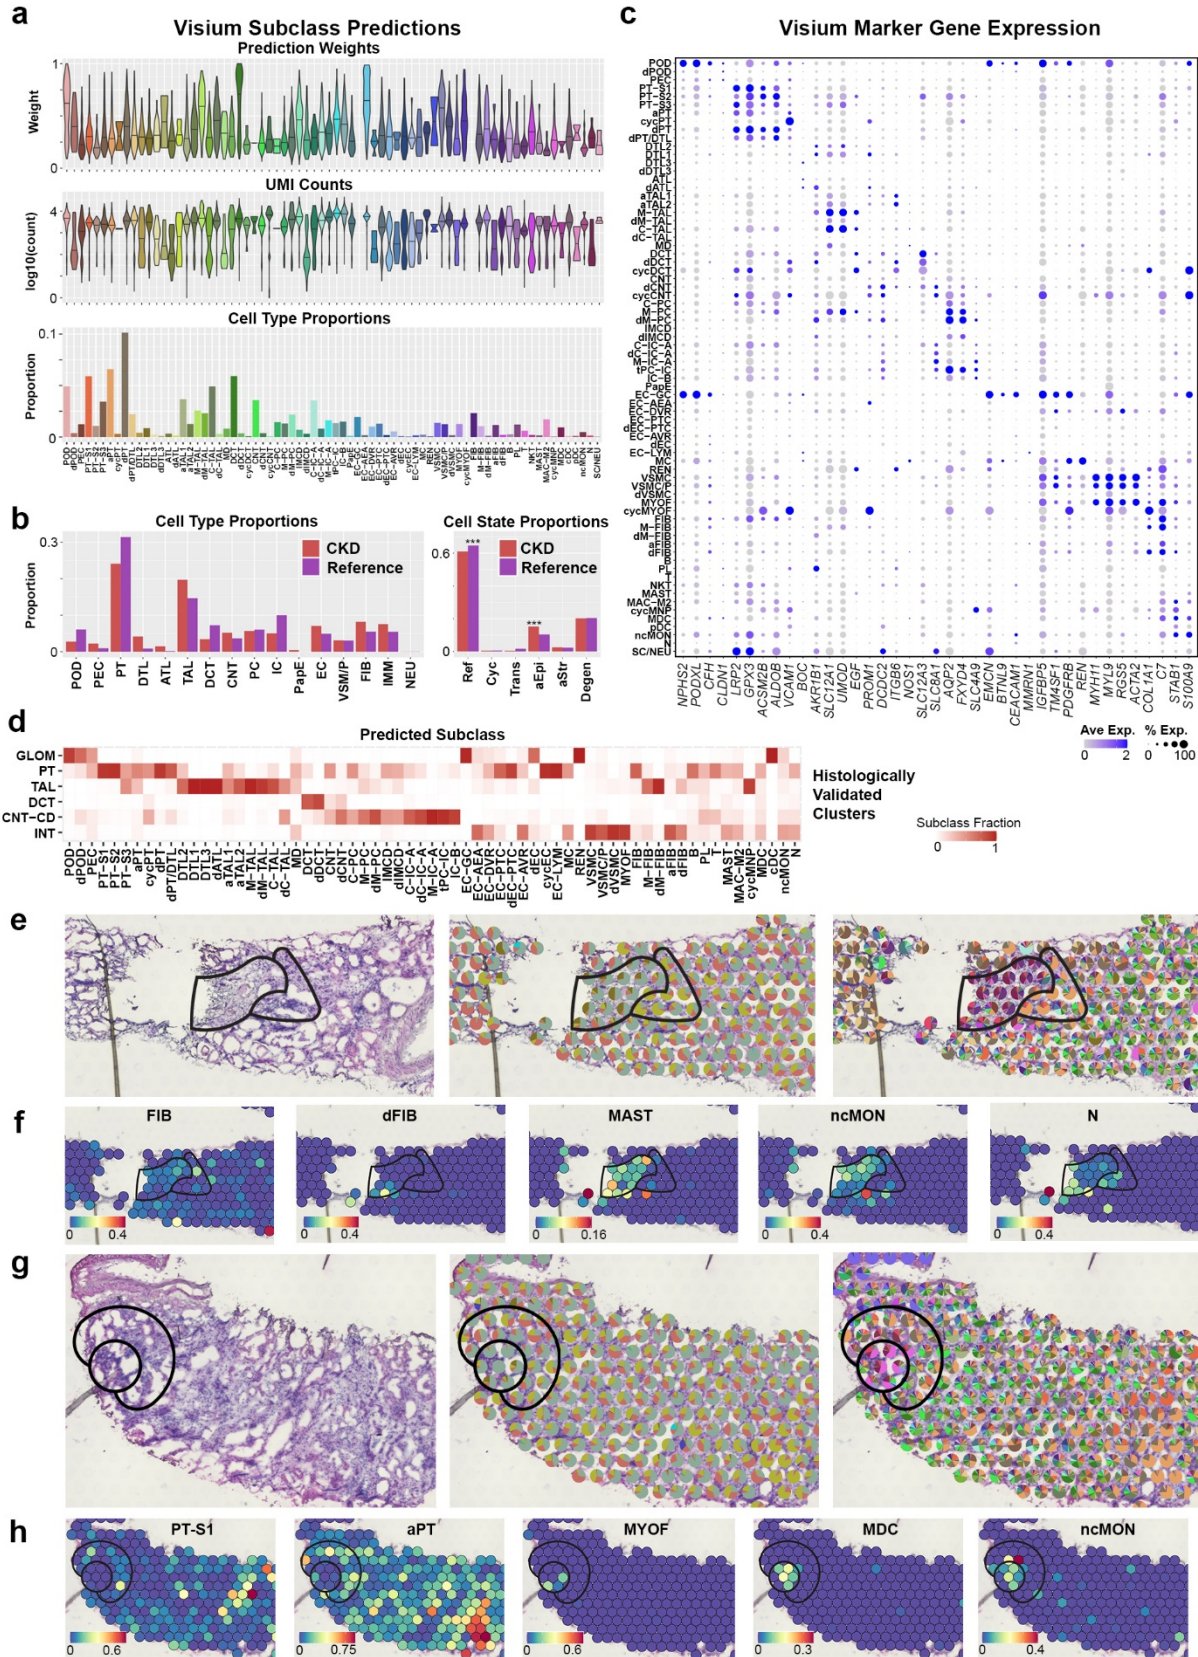

1588 **Extended Data Figure 7. 10X Visium predicted cell types. a.** Analysis of subclass prediction  
1589 on Visium spots for 4 reference nephrectomies and 4 biopsy specimens with chronic kidney  
1590 disease (CKD). The top panel presents the distribution of transfer scores for the subclass (level  
1591 3) with the highest score in each spot. The middle panel presents the UMI counts associated  
1592 with these spots. The bottom panel depicts the proportion of transcriptomic signatures for each  
1593 subclass. In every spot subclass which had a non-zero transfer score, a fraction of the spot was  
1594 assigned to the subclass, proportional to its transfer score relative to all non-zero transfer  
1595 scores in that spot. **b.** Proportion of transcriptomic signatures in 4 CKD biopsies and 4  
1596 Reference nephrectomies. Left panel presents cell type classes and the right panel presents cell  
1597 states. Where significance is indicated, p values are lower than  $10^{-4}$  as calculated by a Fisher's  
1598 Exact test. **c.** Gene expression of select cell markers by predicted subclass (level 3) for all 8  
1599 samples. **d.** Alignment between the predicted cell type subclass and unsupervised clusters that  
1600 were histologically validated (Methods). **e.** Detailed region of a CKD biopsy with fibrosis (left  
1601 outline) and surrounding altered PT (right outline). The first panel presents the histological  
1602 image, the middle panel shows the proportion of each cell state mapped to the spots, and the  
1603 right panel shows the proportion of cell type subclasses. Each spot is 55  $\mu\text{m}$  in diameter. **f.**  
1604 Predicted transfer scores of fibroblasts and immune cell types in the region shown in **(e)**. **g.**  
1605 Detail of a region of immune cell infiltration (circle outline) and surrounding altered PT (outer  
1606 crescent outline) on a CKD. From left to right: the histological image, the proportion of cell states  
1607 predicted to each spot, and the proportion of subclasses. **h.** Predicted transfer scores for  
1608 proximal tubules and MyoF and monocytes in the regions shown in **(g)**.  
1609  
1610



1613 **Extended Data Figure 8. Adaptive epithelial state signatures. a.** Immunofluorescent staining  
1614 of VCAM1, AQP1, KIM1 (HAVCR1) in the aPT and UMOD, PROM1 and KIM1 in the TAL. Scale  
1615 bars represent 20  $\mu$ m. **b.** Gene Set Enrichment Analysis (GSEA) for genes upregulated or  
1616 downregulated in adaptive epithelial states compared to reference states. **c.** Dot plot showing  
1617 averaged marker gene expression values (log scale) and proportion expressed for snCv3  
1618 clusters. **d.** Dot plots showing SNARE2 average accessibilities (chromVAR) and proportion  
1619 accessible for TFBSs showing differential activity in both aPT and aTAL.  
1620  
1621

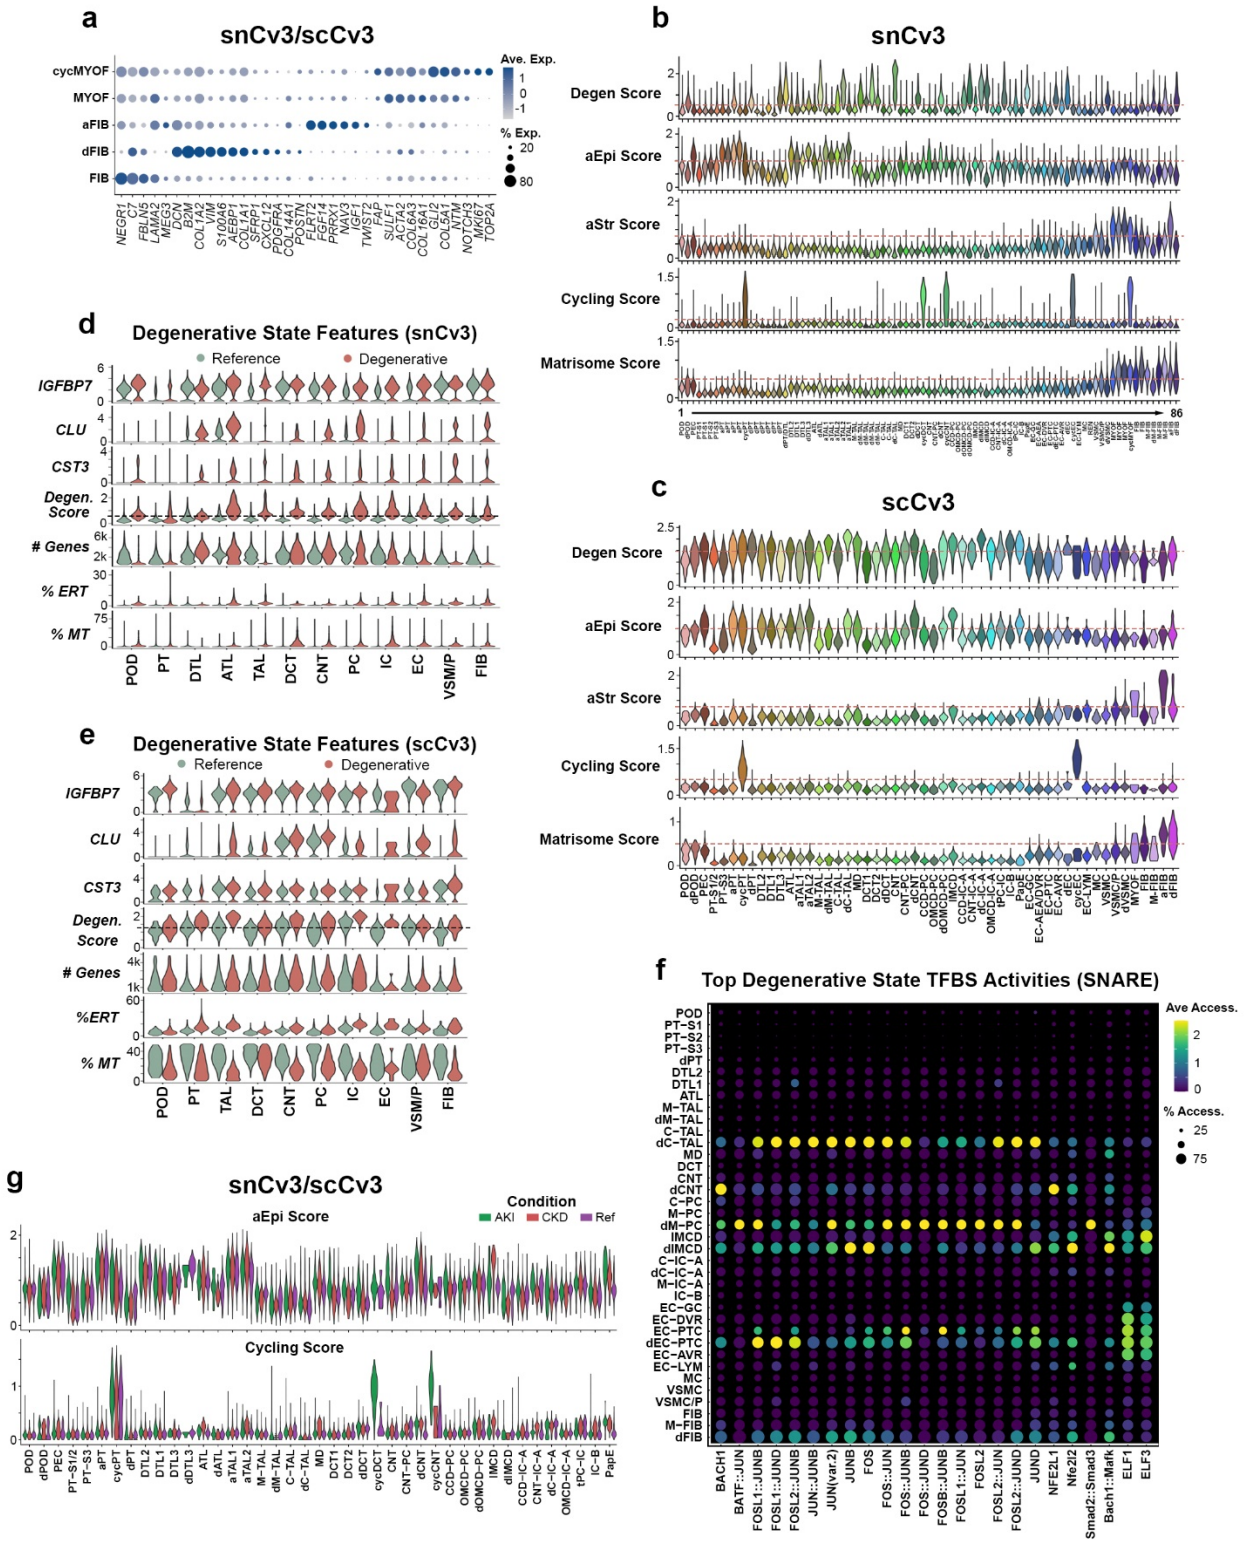



1624 **Extended Data Figure 9. Single cell or nucleus altered state scoring. a.** Dot plot showing  
1625 averaged marker gene expression values (log scale) and proportion expressed for integrated  
1626 snCv3/scCv3 reference, degenerative and adaptive stromal clusters. **b.** Violin plots showing  
1627 adaptive state scores and ECM (matrisome) scores for snCv3 clusters. **c.** Violin plots as in (**b**)  
1628 for scCv3 subclasses. **d.** Violin plots showing degenerative state scores and degenerative  
1629 features (percent mitochondrial transcripts; percent ER or ribosomal transcripts; *CST3*, *CLU* and  
1630 *IGFBP7* expression) for reference or degenerative states of snCv3 level 1 subclasses. **e.** Violin  
1631 plots as in (**d**) for scCv3 level 1 subclasses. **f.** Dot plots showing SNARE2 average  
1632 accessibilities (chromVAR) and proportion accessible for common degenerative TFBSs showing  
1633 differential activity in 3 or more subclass level 1 cell types. **g.** Violin plots showing adaptive  
1634 epithelial (aEpi) and cycling state scores for integrated snCv3/scCv3 level 3 subclasses split by  
1635 condition (reference, AKI, CKD).  
1636  
1637

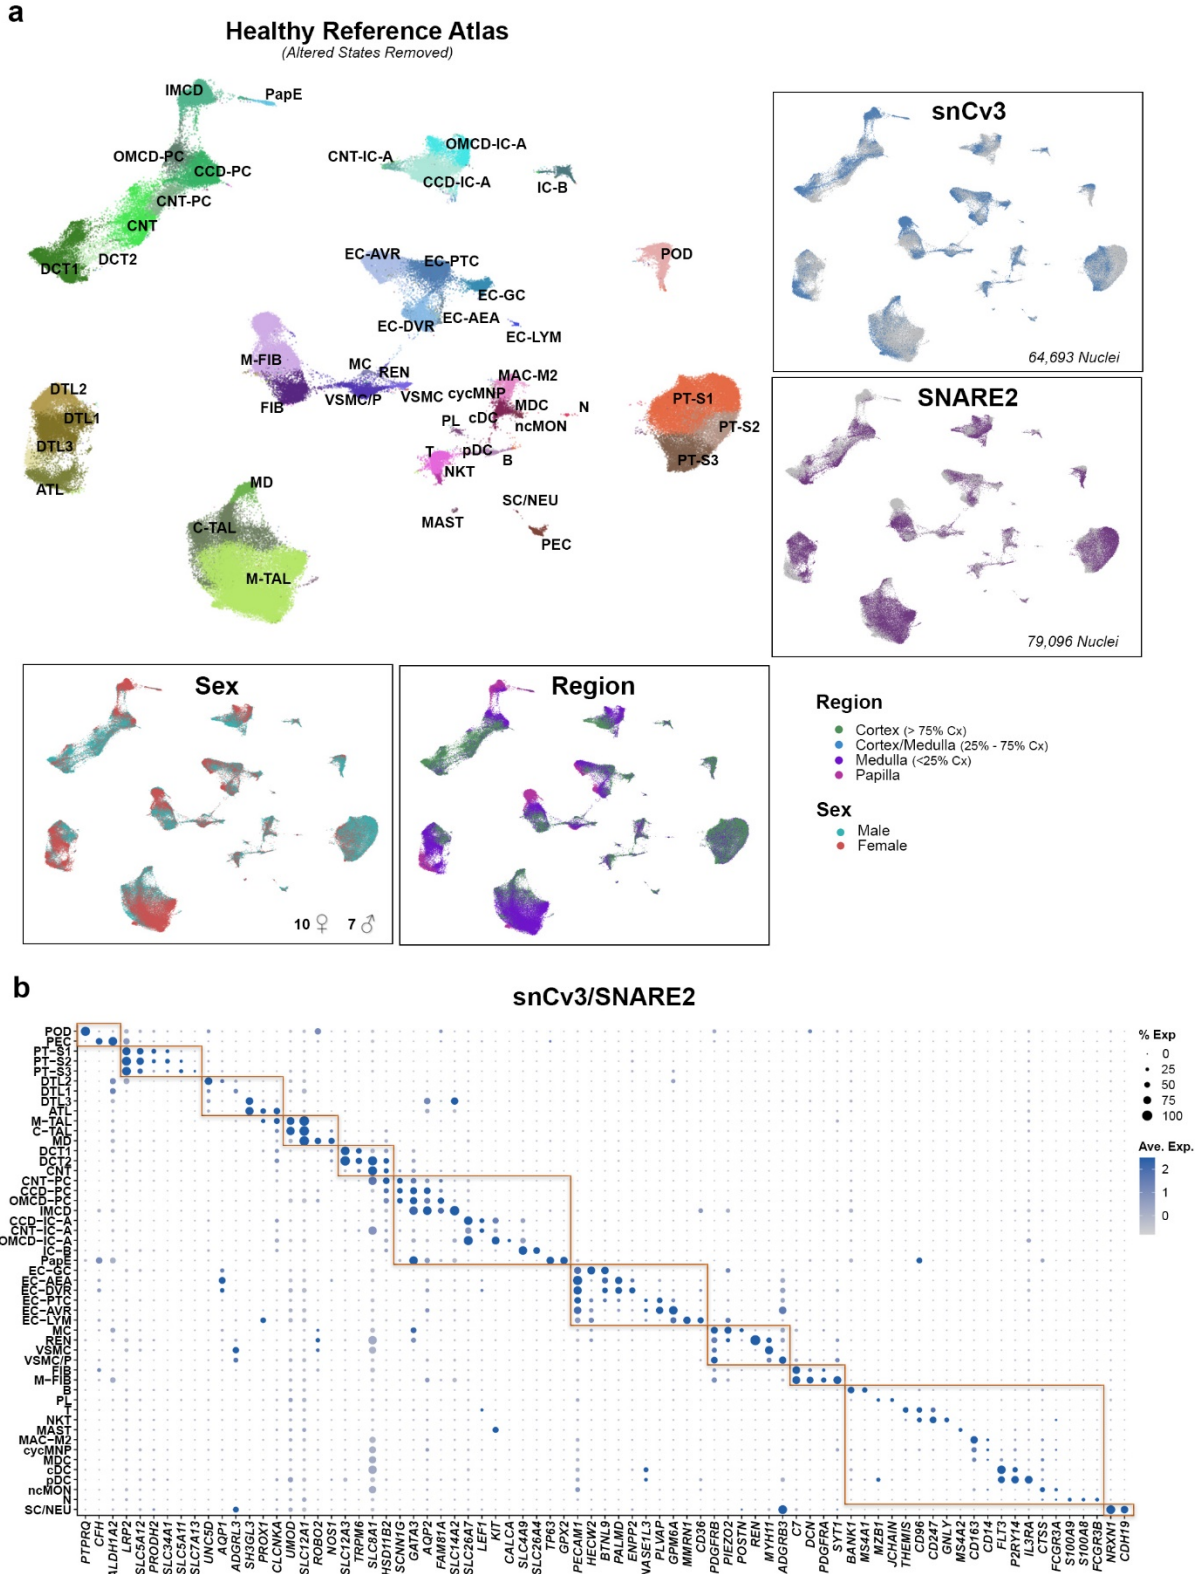

1640 **Extended Data Figure 10. A healthy kidney reference atlas. a.** UMAP plot of reference state  
1641 level 3 subclasses for both snCv3 and SNARE2 (RNA) data. Insets show mapping of the tissue  
1642 region, sex and assay identities. **b.** Dot plot showing averaged marker gene expression values  
1643 (log scale) and proportion expressed for integrated snCv3/SNARE2 level 3 subclasses.  
1644  
1645

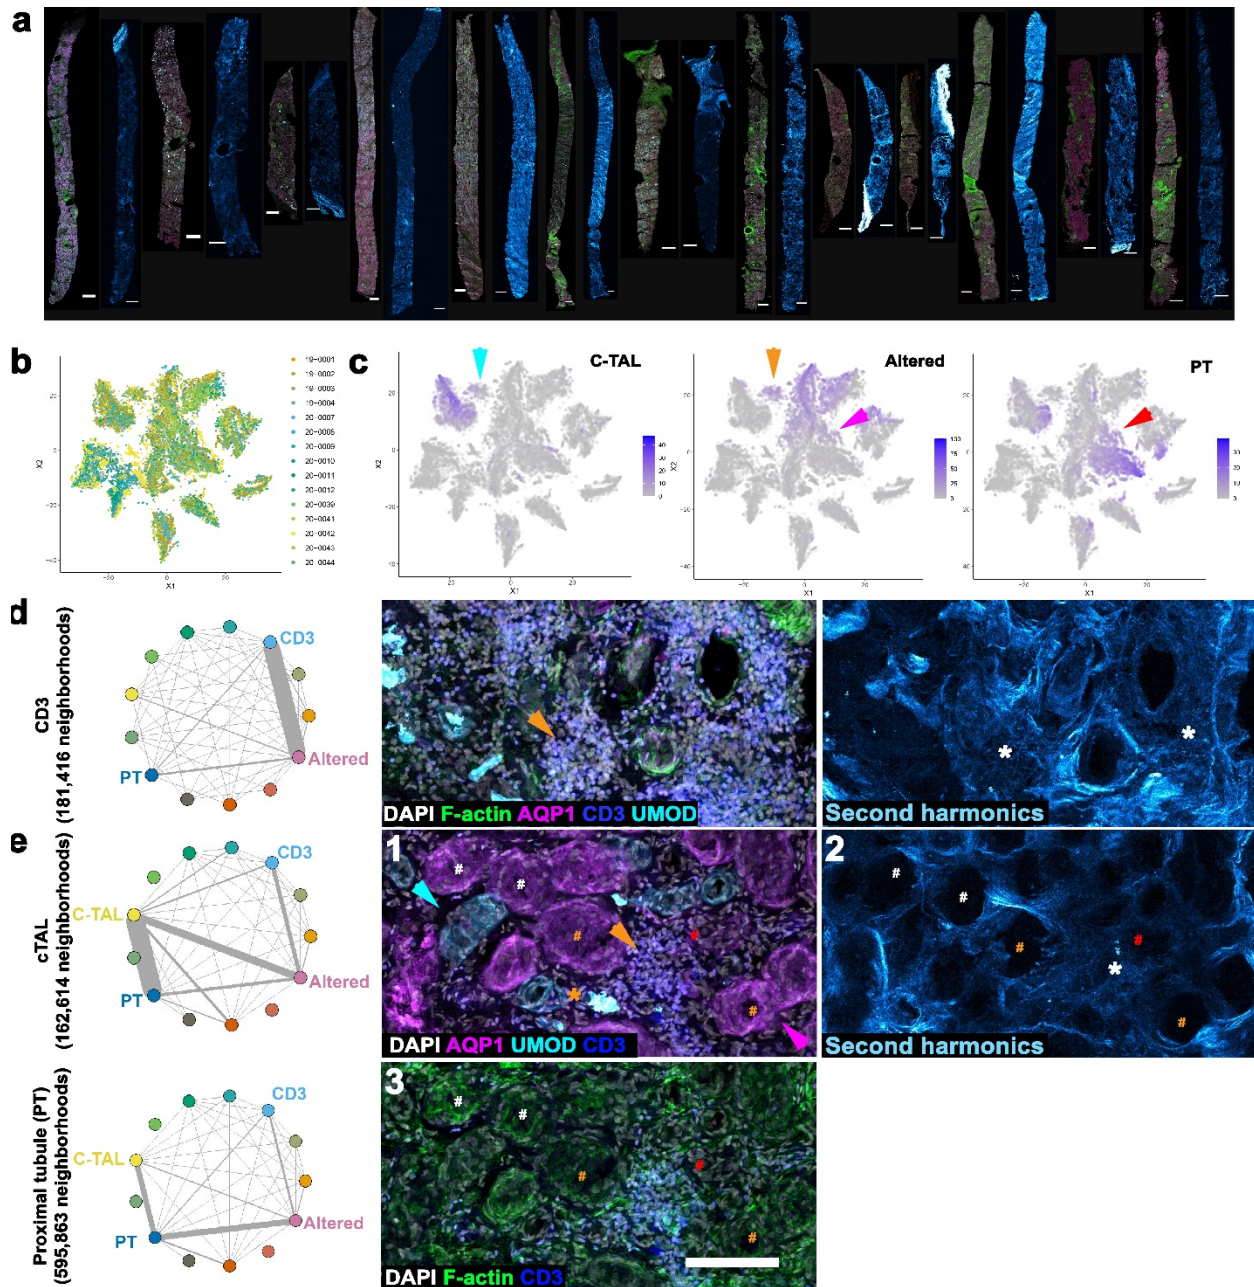

1646  
1647

1648 **Extended Data Figure 11. 3D imaging identifies injury neighborhoods.** **a.** Maximum  
1649 intensity projections of immunofluorescence and second harmonic images for 13 example  
1650 biopsies, scale bars 500  $\mu$ m. **b.** distribution of neighborhoods by specimen in neighborhood  
1651 clusters plotted in tSNE space from Fig. 4. **c.** Feature plots of the number of cells per  
1652 neighborhood for cortical TAL (C-TAL), altered morphology and proximal tubule (PT). C-TALs  
1653 and PTs are found in neighborhoods with altered morphology, cyan and orange vs. red and  
1654 magenta arrowheads. **d** and **e**, pairwise subset analysis of CD3+, PT and TAL (orange,  
1655 magenta and cyan arrows respectively). CD3+ cells cluster in regions of fibrosis (orange  
1656 arrowhead and white asterisks). UMOD positive casts associate with regions of injury and CD3+  
1657 cells (orange asterisk), the tubular epithelium is intact with brush borders (white #), has

1658 evidence of epithelial simplification (orange #) and shows a loss of marker and epithelial  
1659 simplification (red #). Scale bar 100 um.  
1660  
1661

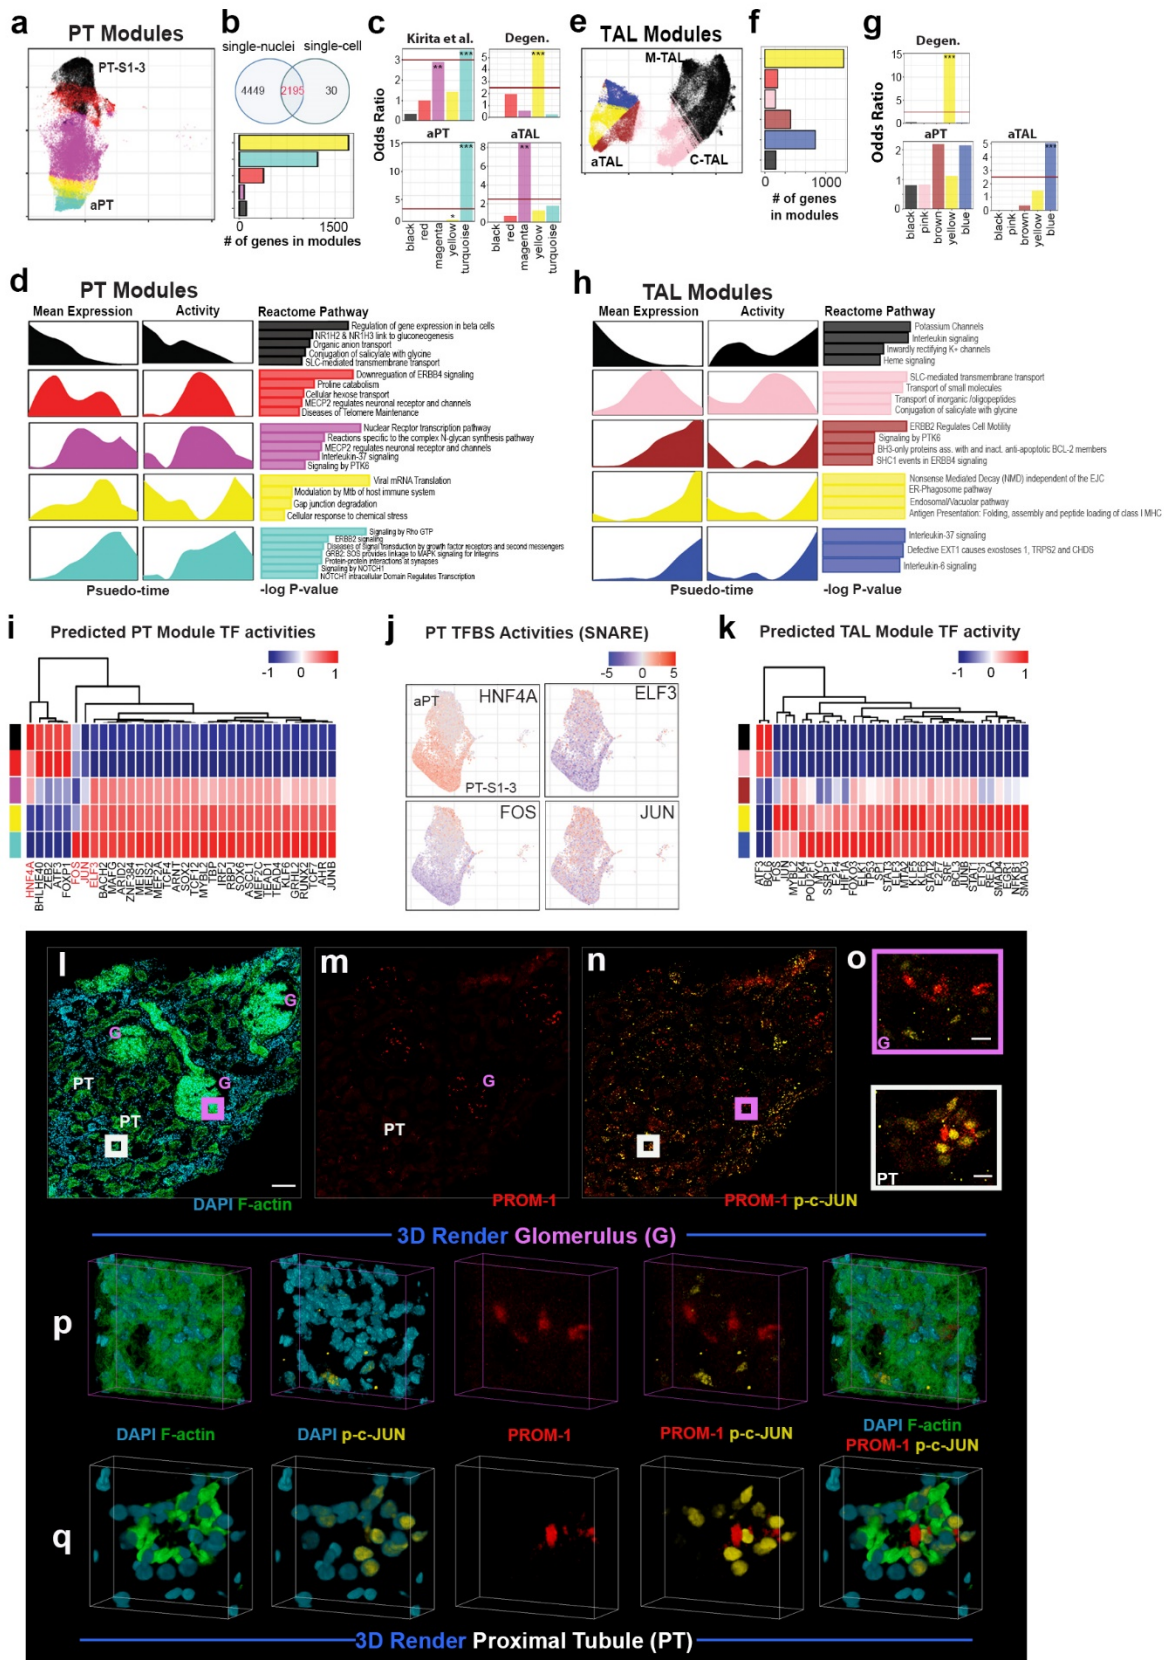

1663 **Extended Data Figure 12. Expression signatures of adaptive epithelia. a.** Umap embedding  
1664 of PT cells colored by assigned modules (**Fig. 5**). **b.** Top: overlap of module associated genes in  
1665 snCv3 and scCv3. Bottom: The number of genes in each PT module. **c.** Enrichment of failed to  
1666 repair genes identified in Kirita et al.<sup>3</sup> and genesets used for clinical outcome association  
1667 (**Supplementary Table 27**) in each module (PT cells) identified by log-ratio test. **d.** The mean  
1668 gene expression profile as a function of pseudo-time in PT modules and the top metabolic  
1669 pathways in each identified module. **e.** Umap embedding of TAL cells colored by assigned  
1670 modules (**Fig. 5**). **f.** The number of genes in TAL modules. **g.** Enrichment of genesets used for  
1671 clinical outcome association (**Supplementary Table 27**) in each module (TAL cells) identified  
1672 by log-ratio test. **h.** The mean gene expression profile as a function of pseudo-time in TAL  
1673 modules and the corresponding top metabolic pathways in each identified module. **i, k.**  
1674 Predicted TF transcription activities for cells in PT and TAL modules. **j.** Transcription binding site  
1675 activities identified by SNARE2 for selected genes. **l-n.** 3D confocal imaging of a reference  
1676 kidney tissue section stained for PROM-1 (red), Phospho-c-Jun (p-c-JUN, yellow), F-actin (with  
1677 FITC phalloidin, green) and DNA with DAPI (cyan) (scale bar 100um). Regions of PROM-1  
1678 within a glomerulus (G) and a proximal tubule (PT) are marked with the magenta and white box,  
1679 respectively and enlarged in (**o**) (scale bar 10um). **p.** and **q.** are snapshots of rendered 3D  
1680 volumes V from the areas shown in (**o**). These areas show the association of PROM-1  
1681 expression with p-c-Jun+ cells in the tubules but not in glomerular cells. 3D rendering was  
1682 performed using the Voxx software from the Indiana Center for Biological Microscopy  
1683 ([voxx.sitehost.iu.edu/](http://voxx.sitehost.iu.edu/)).  
1684  
1685





1690 secreted ligand and receptor interactions (excluding integrins) identified for signaling from  
1691 vascular and adaptive epithelial cells to the stroma. **c.** Significant ( $p$  value  $< 0.05$ ) secreted  
1692 ligand and receptor interactions (excluding integrins) identified for signaling from adaptive  
1693 epithelial trajectory modules to immune cells. Only interactions that were also not significant ( $p$   
1694 value  $> 0.05$ ) in reference modules were plotted. **d.** Significant ( $p$  value  $< 0.05$ ) secreted ligand  
1695 and receptor interactions (excluding integrins) identified for signaling from macrophage-type  
1696 immune cells to the adaptive epithelial modules. **e.** Dot plot showing averaged gene expression  
1697 values (log scale) and proportion expressed for select ligands and receptors. All ligand-receptor  
1698 analyses and expression plots were for integrated snCv3/scCv3 level 3 subclasses or modules.  
1699  
1700

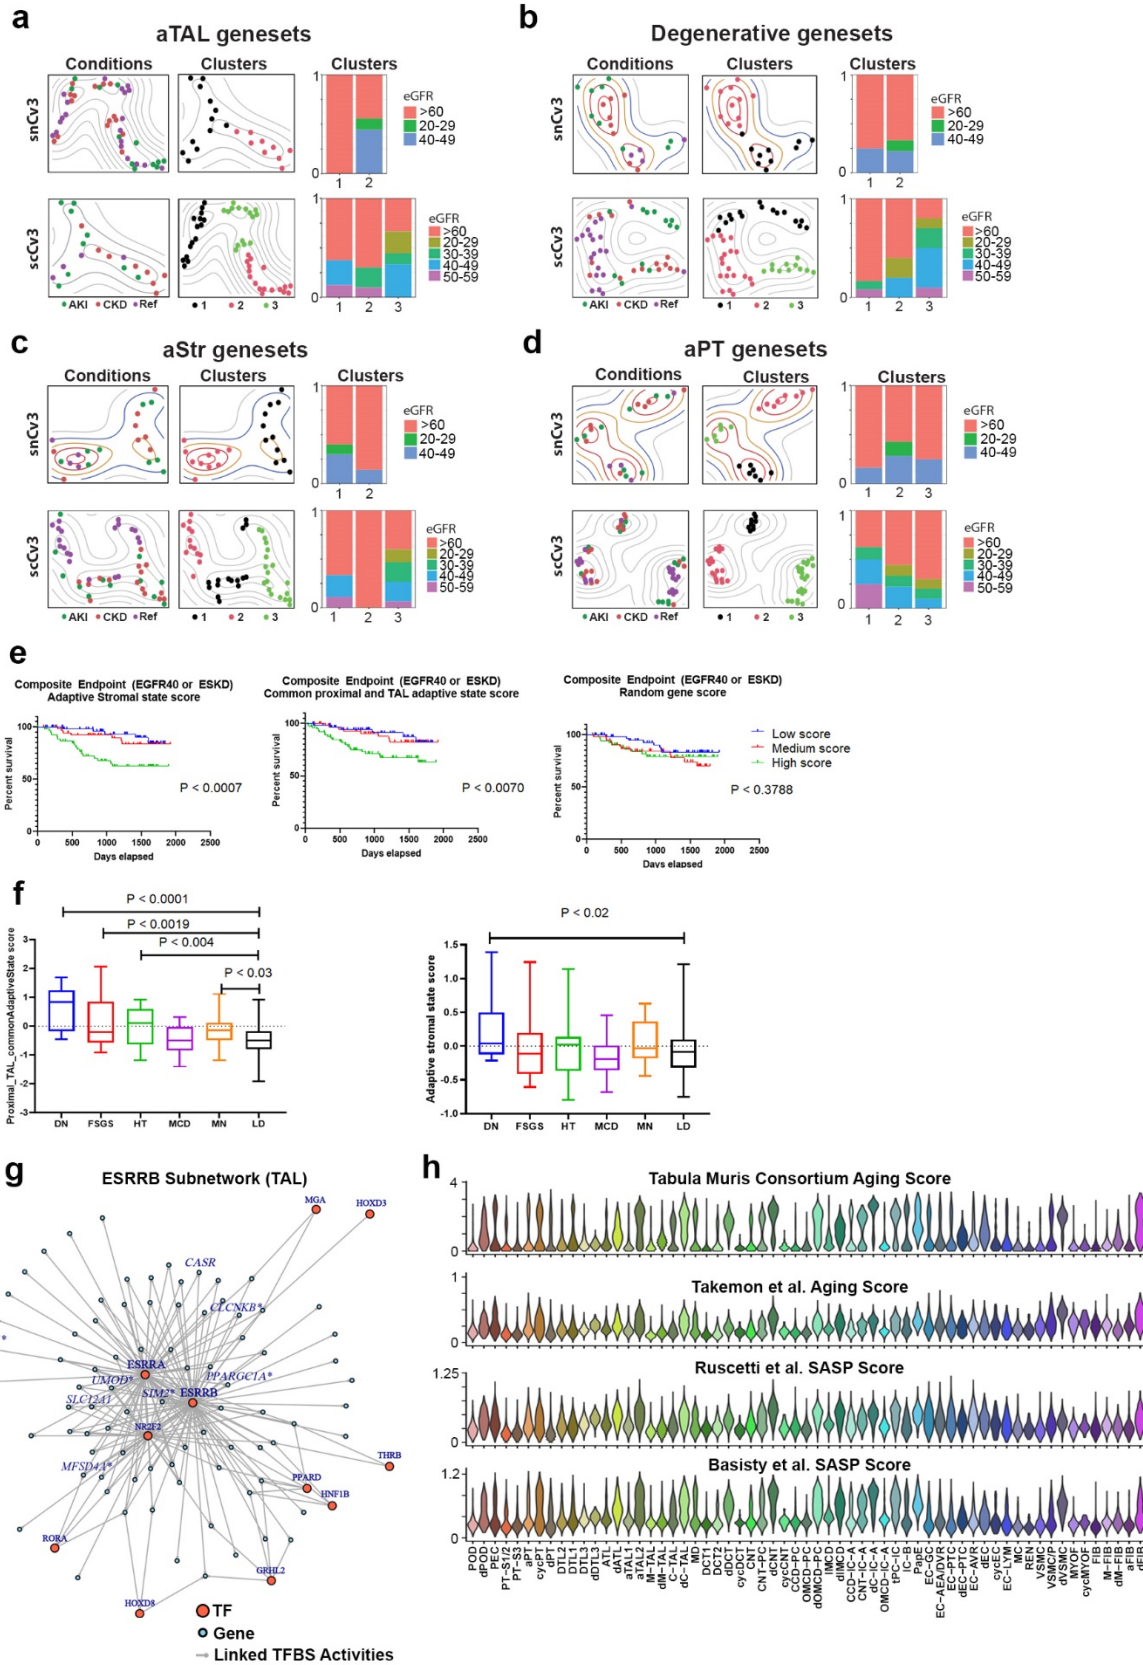

1702 **Extended Data Figure 14. Association of cell state scores with clinical phenotypes.** **a.** Left  
1703 panels: grouping of patient-level expression profiles for the aTAL geneset used for clinical  
1704 outcome association (**Supplementary Table 27**) for snCv3 (Top) and scCv3 (Bottom). Right  
1705 panels: the distribution of eGFR among the identified groups. **b.** Plots as in (a) for the  
1706 degenerative geneset used for clinical outcome association. **c.** Plots as in (a) for the aStr  
1707 geneset used for clinical outcome association. **d.** Plots as in (a) for the aPT geneset used for  
1708 clinical outcome association. **e.** Unadjusted Kaplan Meier curves by aStr and common aPT and  
1709 aTAL state scores for composite of ESRD or 40% drop in eGFR from time of biopsy in Neptune  
1710 adult patient cohort. P values from log-rank tests for trend are shown. A score generated using  
1711 100 randomly selected genes failed to show any correlation with disease survival. **f.** Boxplot of  
1712 aStr and common aPT and aTAL cell state scores by kidney disease groups in the ERCB  
1713 cohort. Significant P values from unpaired t-tests between disease groups and LD are shown.  
1714 The DN patient group had significantly higher aStr and common aPT and aTAL cell state scores  
1715 compared to LD. **g.** ESRRB subnetwork of TF connections to target genes generated using  
1716 SNARE2 RNA and AC data, demonstrating a central role for ESRRB in regulating TAL marker  
1717 genes. Inset shows the ESRRB motif. Boxes represent ESRRB target genes showing causal  
1718 variant enrichment within linked regulatory regions (AC peaks). **h.** Violin plots show gene  
1719 expression scores for gene sets associated with aging (Tabula Muris Consortium<sup>46</sup> and  
1720 Takemon et al.<sup>63</sup>) or SASP (Ruscetti et al.<sup>64</sup> or Basisty et al.<sup>65</sup>).

1721

1722

1723

1724

## 1725 Supplementary Tables

- 1726
- 1727 **Supplementary Table 1.** Summary of omic experiments
- 1728 **Supplementary Table 2.** Summary of 3D imaging and spatial transcriptomic experiments
- 1729 **Supplementary Table 3.** Sample Clinical Data
- 1730 **Supplementary Table 4.** snCv3 cluster annotations
- 1731 **Supplementary Table 5.** snCv3 Cell Type Marker Genes
- 1732 **Supplementary Table 6.** scCv3 cluster annotations
- 1733 **Supplementary Table 7.** SNARE2 (RNA/AC) cluster annotations (Post-AC processing and  
1734 clusters > 50 nuclei, Methods)
- 1735 **Supplementary Table 8.** snCv3 NSForestv2 Computational Marker Genes
- 1736 **Supplementary Table 9.** scCv3 NSForestv2 Computational Marker Genes
- 1737 **Supplementary Table 10.** Differentially Accessible Regions (DARs) associated with subclass  
1738 level marker genes
- 1739 **Supplementary Table 11.** Motif enrichments for marker gene associated Differentially  
1740 Accessible Regions (DARs)
- 1741 **Supplementary Table 12.** Cell type specific TFBS activities
- 1742 **Supplementary Table 13.** Cell state definitions
- 1743 **Supplementary Table 14.** aEpi Differentially expressed genes (snCv3)
- 1744 **Supplementary Table 15.** Conserved degenerative state marker genes
- 1745 **Supplementary Table 16.** Conserved adaptive epithelial (aEpi) state marker genes
- 1746 **Supplementary Table 17.** Conserved adaptive stromal (aStr) state
- 1747 **Supplementary Table 18.** Conserved cycling state marker genes
- 1748 **Supplementary Table 19.** Adaptive PT trajectory gene expression modules (snCv3)
- 1749 **Supplementary Table 20.** Adaptive TAL trajectory gene expression modules (snCv3)
- 1750 **Supplementary Table 21.** Adaptive epithelial module reactome pathway analyses
- 1751 **Supplementary Table 22.** TF activities predicted from aEpi gene modules
- 1752 **Supplementary Table 23.** TF activities identified for aEpi trajectory modules using SNARE2
- 1753 **Supplementary Table 24.** CellPhoneDB significant (p value < 0.05) ligand-receptor pairs  
1754 (mean expression values) between adaptive state subclasses and interstitial/vascular cell types
- 1755 **Supplementary Table 25.** CellPhoneDB significant (p value < 0.05) ligand-receptor pairs  
1756 (mean expression values) between adaptive modules and interstitial/vascular cell types
- 1757 **Supplementary Table 26.** CellPhoneDB significant (p value < 0.05) ligand-receptor pairs  
1758 (mean expression values) used in circos plots
- 1759 **Supplementary Table 27.** Altered state gene sets used for clinical outcomes assessment
- 1760 **Supplementary Table 28.** Motif enrichments within causal variant SNP peaks associated with  
1761 the TAL
- 1762 **Supplementary Table 29.** Genesets that distinguish AKI and CKD patients in aPT and aTAL  
1763 trajectories
- 1764 **Supplementary Table 30.** Time of biopsy characteristics of participants in Neptune cohort used  
1765 in this study.
- 1766 **Supplementary Table 31.** Antibodies and dilutions used in mesoscale 3D imaging for 3D  
1767 cytometry

1768 **Supplementary Table 32.** Antibodies and dilutions used in confocal imaging

1769 **Supplementary Table 33.** Tabulation of select marker based 3D cytometry results
